# Supplementary material for: Peptide foldamer-based inhibitors of the SARS-CoV-2 S protein–human ACE2 interaction
Source: PubMed Central journal article supplement — J Enzyme Inhib Med Chem. 2023 Aug 21;38(1):2244693. doi: 10.1080/14756366.2023.2244693 (PMC10446788; doi:10.1080/14756366.2023.2244693), 2023-08-21
Supplement: IENZ_A_2244693_SM3703.pdf [file IENZ_A_2244693_SM3703.pdf]

# Supplementary Information

for

## **Peptide foldamer-based inhibitors of the SARS-CoV-2 S protein - human ACE2 interaction**

Violeta Marković, Jeelan Basha Shaik, Katarzyna Ożga, Agnieszka Ciesiołkiewicz, Juan

Lizandra Perez, Ewa Rudzińska-Szostak, Łukasz Berlicki\*

| <b>Table of contents</b>                                                                                                                                    | <b>page</b> |
|-------------------------------------------------------------------------------------------------------------------------------------------------------------|-------------|
| <b>Table S1.</b> Analytical data of ACEa1 and their analogues                                                                                               | S3          |
| <b>Table S2.</b> Analytical data of peptides <b>1-41</b>                                                                                                    | S4          |
| <b>Table S3.</b> Sequences of helix $\alpha$ 1 of ACE2 (ACE $\alpha$ 1) and their foldameric analogues.                                                     | S6          |
| <b>Figure S1.</b> Modeled complex of peptide <b>A1</b> and the RBD domain of protein S                                                                      | S7          |
| <b>Figure S2.</b> Comparison of CD spectra of peptides A1-3, and ACE $\alpha$ 1                                                                             | S7          |
| <b>Figure S3.</b> Comparison of BLI sensograms of peptides <b>ACE<math>\alpha</math>1</b> and <b>A2_v2</b>                                                  | S8          |
| <b>Figure S4-S65.</b> HPLC chromatograms                                                                                                                    | S9-S29      |
| <b>Figure S66-S127.</b> CD spectra                                                                                                                          | S30-S60     |
| <b>Figure S128-S189.</b> BLI sensograms                                                                                                                     | S61-S80     |
| <b>Table S4.</b> Chemical shifts of peptide <b>27</b> .                                                                                                     | S81         |
| <b>Table S5.</b> Interproton contacts of peptide <b>27</b>                                                                                                  | S82         |
| <b>Table S6.</b> Vicinal coupling constants ( $^3J_{HNHA}$ ) determined from $^1\text{H}$ NMR spectrum for peptide <b>27</b> .                              | S84         |
| <b>Table S7.</b> NMR calculation statistics for peptide <b>27</b>                                                                                           | S84         |
| Interaction energy calculations                                                                                                                             | S85         |
| <b>Table S8.</b> Peptide-RBD of S protein interaction energies calculated using MMGBSA method                                                               | S85         |
| Molecular dynamics                                                                                                                                          | S86         |
| <b>Figure S190.</b> RMSD and radius of gyration ( $R_g$ ) for complexes of peptides <b>1</b> and <b>27</b> with RBD of the S protein during MD simulations. | S87         |
| <b>References</b>                                                                                                                                           | S88         |

**Table S1.** Analytical data of ACEa1 and their analogues

| Name           | MS calculated                    | MS found                         | analytical HPLC      |          | preparative HPLC     |          |
|----------------|----------------------------------|----------------------------------|----------------------|----------|----------------------|----------|
|                |                                  |                                  | Retention time (min) | gradient | Retention time (min) | gradient |
| ACE $\alpha$ 1 | 934.7869 [M + 3H <sup>+</sup> ]  | 934.7861 [M + 3H <sup>+</sup> ]  | 13.29                | A        | 19.76                | A        |
| A1             | 950.1515 [M + 3H <sup>+</sup> ]  | 950.1512 [M + 3H <sup>+</sup> ]  | 17.26                | A        | 23.85                | A        |
| A1a            | 1212.6628 [M + H <sup>+</sup> ]  | 1212.6626 [M + H <sup>+</sup> ]  | 14.86                | A        | 16.89                | A        |
| A1b            | 626.3138 [M + 2H <sup>+</sup> ]  | 626.3176 [M + 2H <sup>+</sup> ]  | 13.59                | A        | 14.19                | A        |
| A1c            | 650.3044 [M + 2H <sup>+</sup> ]  | 650.3006 [M + 2H <sup>+</sup> ]  | 20.65                | A        | 17.61                | A        |
| A1_v1          | 961.5113 [M + 3H <sup>+</sup> ]  | 961.5126 [M + 3H <sup>+</sup> ]  | 15.20                | A        | 23.83                | A        |
| A1_v2          | 1453.7725 [M + 2H <sup>+</sup> ] | 1453.7930 [M + 2H <sup>+</sup> ] | 16.13                | A        | 24.91                | A        |
| A1_v3          | 970.1794 [M + 3H <sup>+</sup> ]  | 970.1803 [M + 3H <sup>+</sup> ]  | 15.98                | A        | 25.43                | A        |
| A1_v4          | 1428.2338 [M + 2H <sup>+</sup> ] | 1428.2454 [M + 2H <sup>+</sup> ] | 15.67                | A        | 25.11                | A        |
| A2             | 1395.7150 [M + 2H <sup>+</sup> ] | 1395.7090 [M + 2H <sup>+</sup> ] | 25.98                | A        | 24.57                | A        |
| A2a            | 1155.6050 [M + H <sup>+</sup> ]  | 1155.6067 [M + H <sup>+</sup> ]  | 16.49                | A        | 18.37                | A        |
| A2b            | 642.8266 [M + 2H <sup>+</sup> ]  | 642.8256 [M + 2H <sup>+</sup> ]  | 10.66                | A        | 15.94                | A        |
| A2c            | 633.3123 [M + 2H <sup>+</sup> ]  | 633.3179 [M + 2H <sup>+</sup> ]  | 11.42                | A        | 17.53                | A        |
| A2_v1          | 1412.7548 [M + 2H <sup>+</sup> ] | 1412.8201 [M + 2H <sup>+</sup> ] | 17.22                | A        | 32.59                | B        |
| A2_v2          | 1424.2627 [M + 2H <sup>+</sup> ] | 1424.3079 [M + 2H <sup>+</sup> ] | 18.18                | A        | 34.28                | B        |
| A2_v3          | 1425.7570 [M + 2H <sup>+</sup> ] | 1425.7865 [M + 2H <sup>+</sup> ] | 18.58                | A        | 35.94                | B        |
| A2_v4          | 1399.2255 [M + 2H <sup>+</sup> ] | 1399.2761 [M + 2H <sup>+</sup> ] | 18.17                | A        | 35.36                | B        |
| A3             | 949.4796 [M + 3H <sup>+</sup> ]  | 949.4785 [M + 2H <sup>+</sup> ]  | 15.50                | A        | 33.74                | A        |
| A3a            | 1172.6316 [M + H <sup>+</sup> ]  | 1172.6313 [M + H <sup>+</sup> ]  | 13.02                | A        | 15.34                | A        |
| A3b            | 1286.6169 [M + H <sup>+</sup> ]  | 1286.6163 [M + H <sup>+</sup> ]  | 7.92                 | B        | 15.26                | A        |
| A3c            | 1301.6166 [M + H <sup>+</sup> ]  | 1301.6171 [M + H <sup>+</sup> ]  | 12.90                | A        | 19.53                | A        |

**Analytical HPLC** program (eluent A: 0.05% TFA in H<sub>2</sub>O, eluent B: 0.05% TFA in ACN, flow 0.9 mL/min, column: ReproSil Saphir 100 C18, 5 $\mu$ , 150 x 4.6 mm):

A: t=0 min, 90 % A; t=2 min, 90% A; t=32 min, 10% A,

B: t=0 min, 90 % A; t=2 min, 90% A; t=20 min, 10% A.

**Preparative HPLC** programs (eluent A: 0.05% TFA in H<sub>2</sub>O, eluent B: 0.05% TFA in ACN, flow 10 mL/min):

A: t=0 min, 90 % A; t=6 min, 90 % A; t=10 min, 75% A; t=20 min, 60% A; t=30 min, 60% A; t=35 min, 10 % A,

B: t=0 min, 90 % A; t=6 min, 90 % A; t=10 min, 75% A; t=40 min, 45% A; t=42 min, 10 % A.

**Table S2.** Analytical data of peptides **1-41**

| Name      | MS calculated                                | MS found                                         | analytical HPLC      |          | preparative HPLC     |          |
|-----------|----------------------------------------------|--------------------------------------------------|----------------------|----------|----------------------|----------|
|           |                                              |                                                  | Retention time (min) | gradient | Retention time (min) | gradient |
| <b>1</b>  | 991.0601 [M + 2H <sup>+</sup> ]              | 991.0590 [M + 2H <sup>+</sup> ]                  | 14.63                | A        | 31.06                | C        |
| <b>2</b>  | 998.5693 [M + 2H <sup>+</sup> ]              | 998.5263 [M + 2H <sup>+</sup> ]                  | 13.58                | A        | 20.63                | A        |
| <b>3</b>  | 1034.5630 [M + 2H <sup>+</sup> ]             | 1034.4657 [M + 2H <sup>+</sup> ]                 | 13.57                | A        | 20.40                | A        |
| <b>4</b>  | 1035.0670 [M + 2H <sup>+</sup> ]             | 1035.0679 [M + 2H <sup>+</sup> ]                 | 13.38                | A        | 20.28                | A        |
| <b>5</b>  | 1091.4665 [M K <sup>+</sup> H <sup>+</sup> ] | 1091.4868 [M + K <sup>+</sup> + H <sup>+</sup> ] | 16.63                | A        | 26.17                | A        |
| <b>6</b>  | 1135.5807 [M + 2H <sup>+</sup> ]             | 1135.5791 [M + 2H <sup>+</sup> ]                 | 18.85                | A        | 46.00                | E        |
| <b>7</b>  | 1079.0386 [M + 2H <sup>+</sup> ]             | 1079.0906 [M + 2H <sup>+</sup> ]                 | 15.08                | A        | 27.117               | B        |
| <b>8</b>  | 1116.0313 [M + 2H <sup>+</sup> ]             | 1116.0376 [M + 2H <sup>+</sup> ]                 | 15.29                | A        | 27.507               | B        |
| <b>9</b>  | 1115.5363 [M + 2H <sup>+</sup> ]             | 1115.5863 [M + 2H <sup>+</sup> ]                 | 14.84                | A        | 26.233               | B        |
| <b>10</b> | 1151.5323 [M + 2H <sup>+</sup> ]             | 1151.5377 [M + 2H <sup>+</sup> ]                 | 15.00                | A        | 26.407               | B        |
| <b>11</b> | 1147.5337 [M + 2H <sup>+</sup> ]             | 1147.5325 [M + 2H <sup>+</sup> ]                 | 16.65                | A        | 26.177               | B        |
| <b>12</b> | 1161.5549 [M + 2H <sup>+</sup> ]             | 1161.5541 [M + 2H <sup>+</sup> ]                 | 15.43                | A        | 28.007               | B        |
| <b>13</b> | 1139.0078 [M + 2H <sup>+</sup> ]             | 1139.0553 [M + 2H <sup>+</sup> ]                 | 14.24                | A        | 24.517               | B        |
| <b>14</b> | 1160.0131 [M + 2H <sup>+</sup> ]             | 1160.0117 [M + 2H <sup>+</sup> ]                 | 16.34                | A        | 31.773               | B        |
| <b>15</b> | 1184.0313 [M + 2H <sup>+</sup> ]             | 1184.0369 [M + 2H <sup>+</sup> ]                 | 14.51                | A        | 24.89                | B        |
| <b>16</b> | 1176.0338 [M + 2H <sup>+</sup> ]             | 1176.0411 [M + 2H <sup>+</sup> ]                 | 15.68                | A        | 27.203               | B        |
| <b>17</b> | 1158.5402 [M + 2H <sup>+</sup> ]             | 1158.5487 [M + 2H <sup>+</sup> ]                 | 14.98                | A        | 32.353               | B        |
| <b>18</b> | 1151.5419 [M + 2H <sup>+</sup> ]             | 1151.5477 [M + 2H <sup>+</sup> ]                 | 15.05                | A        | 32.127               | B        |
| <b>19</b> | 1184.5653 [M + 2H <sup>+</sup> ]             | 1184.5657 [M + 2H <sup>+</sup> ]                 | 16.62                | A        | 33.000               | B        |

|    |                                  |                                  |       |   |        |   |
|----|----------------------------------|----------------------------------|-------|---|--------|---|
| 20 | 1167.5731 [M + 2H <sup>+</sup> ] | 1167.5747 [M + 2H <sup>+</sup> ] | 16.52 | A | 33.383 | B |
| 21 | 1167.5731 [M + 2H <sup>+</sup> ] | 1167.5735 [M + 2H <sup>+</sup> ] | 16.71 | A | 31.04  | B |
| 22 | 1142.0494 [M + 2H <sup>+</sup> ] | 1142.0483 [M + 2H <sup>+</sup> ] | 15.27 | A | 26.483 | B |
| 23 | 1150.0470 [M + 2H <sup>+</sup> ] | 1150.0481 [M + 2H <sup>+</sup> ] | 15.09 | A | 26.89  | B |
| 24 | 1125.0574 [M + 2H <sup>+</sup> ] | 1125.0574 [M + 2H <sup>+</sup> ] | 15.3  | A | 27.117 | B |
| 25 | 1171.0760 [M + 2H <sup>+</sup> ] | 1171.0754 [M + 2H <sup>+</sup> ] | 15.25 | A | 29.48  | B |
| 26 | 1173.0629 [M + 2H <sup>+</sup> ] | 1173.0623 [M + 2H <sup>+</sup> ] | 15.89 | A | 27.22  | B |
| 27 | 1182.5840 [M + 2H <sup>+</sup> ] | 1182.5743 [M + 2H <sup>+</sup> ] | 15.02 | A | 32.71  | C |
| 28 | 1178.56 [M + 2H <sup>+</sup> ]   | 1178.56 [M + 2H <sup>+</sup> ]   | 15.75 | A | 28.25  | B |
| 29 | 1168.5627 [M + 2H <sup>+</sup> ] | 1168.5641 [M + 2H <sup>+</sup> ] | 15.7  | A | 27.00  | B |
| 30 | 1168.5627 [M + 2H <sup>+</sup> ] | 1168.5638 [M + 2H <sup>+</sup> ] | 15.82 | A | 26.89  | B |
| 31 | 1192.1051 [M + 2H <sup>+</sup> ] | 1192.1146 [M + 2H <sup>+</sup> ] | 14.79 | A | 25.01  | C |
| 32 | 1189.0903 [M + 2H <sup>+</sup> ] | 1189.1252 [M + 2H <sup>+</sup> ] | 15.16 | A | 27.99  | C |
| 33 | 1190.0933 [M + 2H <sup>+</sup> ] | 1190.0872 [M + 2H <sup>+</sup> ] | 15.58 | A | 32.23  | B |
| 34 | 1211.5868 [M + 2H <sup>+</sup> ] | 1211.6257 [M + 2H <sup>+</sup> ] | 15.14 | A | 33.43  | E |
| 35 | 1189.5918 [M + 2H <sup>+</sup> ] | 1189.5957 [M + 2H <sup>+</sup> ] | 15.50 | A | 33.40  | E |
| 36 | 1186.5922 [M + 2H <sup>+</sup> ] | 1186.5850 [M + 2H <sup>+</sup> ] | 14.18 | A | 23.49  | C |
| 37 | 1207.5974 [M + 2H <sup>+</sup> ] | 1207.5916 [M + 2H <sup>+</sup> ] | 14.68 | A | 27.32  | C |
| 38 | 1199.5762 [M + 2H <sup>+</sup> ] | 1199.5793 [M + 2H <sup>+</sup> ] | 15.05 | A | 29.77  | B |
| 39 | 1208.0751 [M + 2H <sup>+</sup> ] | 1208.0784 [M + 2H <sup>+</sup> ] | 14.46 | A | 28.32  | C |
| 40 | 1220.5997 [M + 2H <sup>+</sup> ] | 1220.6147 [M + 2H <sup>+</sup> ] | 15.91 | A | 28.80  | D |
| 41 | 1203.5894 [M + 2H <sup>+</sup> ] | 1203.5493 [M + 2H <sup>+</sup> ] | 15.68 | A | 27.15  | D |

**Analytical HPLC** program (eluent A: 0.05% TFA in H<sub>2</sub>O, eluent B: 0.05% TFA in ACN, flow 0.9 mL/min):

A: t=0 min, 90 % A; t=2 min, 90% A; t=32 min, 10% A (ReproSil Saphir 100 C18, 5 $\mu$ , 150 x 4.6 mm column).

**Preparative HPLC** programs (eluent A: 0.05% TFA in H<sub>2</sub>O, eluent B: 0.05% TFA in ACN, flow 10 mL/min):

A: t=0 min, 90 % A; t=6 min, 90 % A; t=10 min, 75% A; t=20 min, 60% A; t=30 min, 60% A; t=35 min, 10 % A,

B: t=0 min, 90 % A; t=6 min, 90 % A; t=10 min, 75% A; t=40 min, 45% A; t=42 min, 10 % A,

C: t=0 min, 85 % A; t=6 min, 85 % A; t=10 min, 73% A; t=40 min, 50% A; t=42 min, 10 % A,  
D: t=0 min, 85 % A; t=6 min, 85 % A; t=10 min, 65% A; t=40 min, 50% A; t=42 min, 10 % A,  
E: t=0 min, 85 % A; t=6 min, 85 % A; t=10 min, 70% A; t=40 min, 50% A; t=42 min, 10 % A.

**Table S3.** Sequences of helix  $\alpha 1$  of ACE2 (ACE $\alpha 1$ ) and their foldameric analogues. Residues interacting with protein S are marker in red. Mutated residues are shown in green and blue. *Trans*-(1*S*,2*S*)-2-aminocyclopentanecarboxylic acid residues are shown as black pentagons.

| Entry | Peptide        | Amino acid sequence                      |
|-------|----------------|------------------------------------------|
| 1     | ACE $\alpha 1$ | IIEEQAKTFLDKFNHEAEDLFYQS-NH <sub>2</sub> |
| 2     | A1             | IIEEQKTFDKNHEEDFYQ-NH <sub>2</sub>       |
| 3     | A1a            | IIEEQKTFD-NH <sub>2</sub>                |
| 4     | A1b            | FDKNHEE-NH <sub>2</sub>                  |
| 5     | A1c            | HEEDFYQ-NH <sub>2</sub>                  |
| 6     | A1_v1          | IIEEQKHF EY NSE HM FRQ-NH <sub>2</sub>   |
| 7     | A1_v2          | IIEEQKHF EW NSE HM FRQ-NH <sub>2</sub>   |
| 8     | A1_v3          | IIEEQKYF EY NSE HM FRQ-NH <sub>2</sub>   |
| 9     | A1_v4          | IIEEQKHF EY NSE HM FEQ-NH <sub>2</sub>   |
| 10    | A2             | IIEQA TFDKFNHEEDLYQ-NH <sub>2</sub>      |
| 11    | A2a            | IIEQA TFD-NH <sub>2</sub>                |
| 12    | A2b            | FDKFNHEE-NH <sub>2</sub>                 |
| 13    | A2c            | HEEDLYQ-NH <sub>2</sub>                  |
| 14    | A2_v1          | IIEQA HF EYF SE HML RQ-NH <sub>2</sub>   |
| 15    | A2_v2          | IIEQA HF EW F SE HML RQ-NH <sub>2</sub>  |
| 16    | A2_v3          | IIEQA YF EYF SE HML RQ-NH <sub>2</sub>   |
| 17    | A2_v4          | IIEQA HF EYF SE HML EQ-NH <sub>2</sub>   |
| 18    | A3             | IIEQAKTFLDKFNHEAEDLFYQ-NH <sub>2</sub>   |
| 19    | A3a            | IIEQAKTFD-NH <sub>2</sub>                |
| 20    | A3b            | FDKFNHEE-NH <sub>2</sub>                 |
| 21    | A3c            | HEEDLFYQ-NH <sub>2</sub>                 |

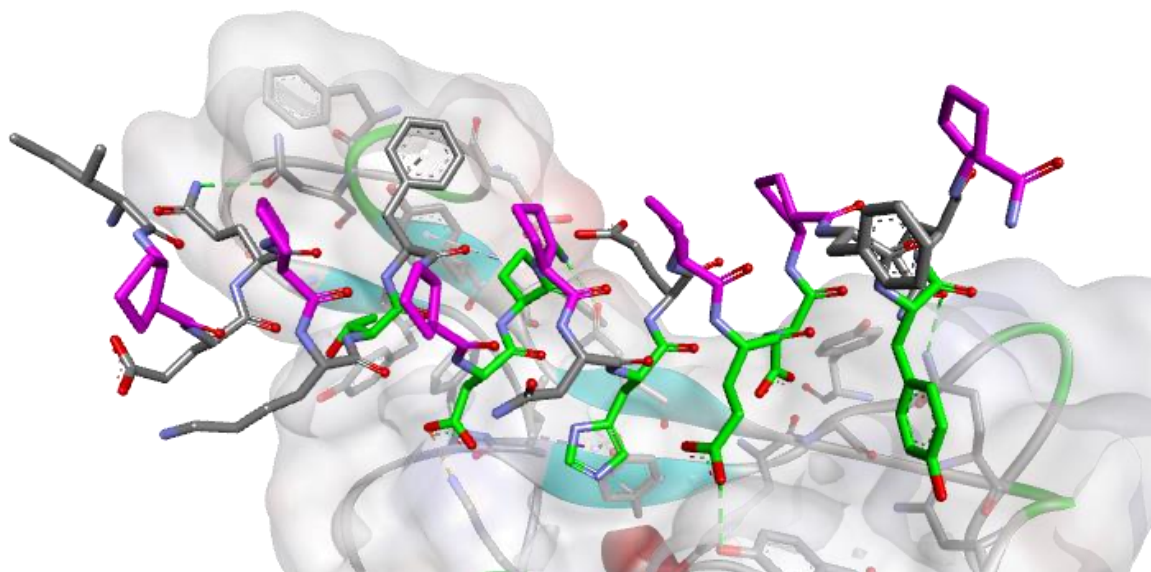

**Figure S1.** Modeled complex of peptide **A1** and the RBD domain of protein S (*trans*-ACPC residues forming “ $\beta$ -stripe” are colored pink).

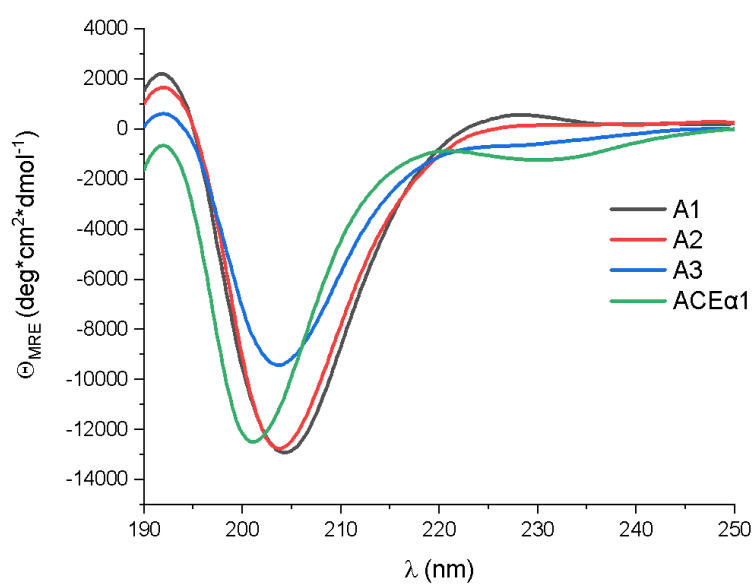

**Figure S2.** Comparison of CD spectra of peptides A1-3, and ACE $\alpha$ 1 dissolved in potassium phosphate buffer, 50 mM, pH 7.5.

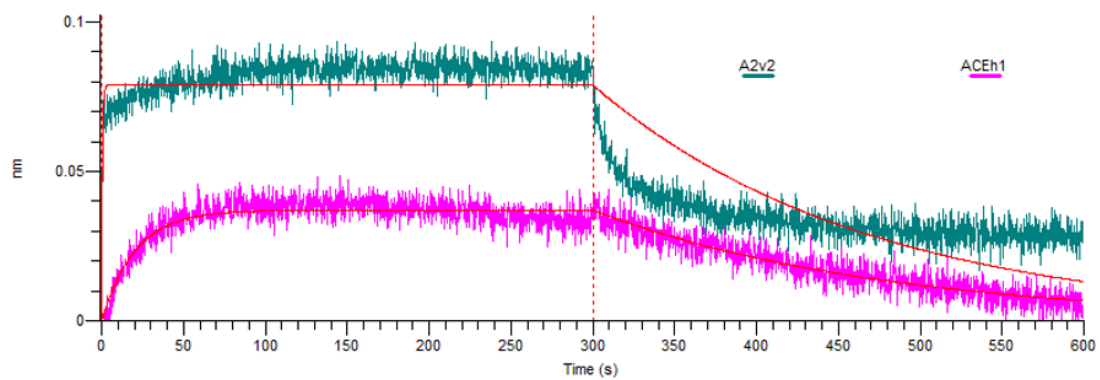

**Figure S3.** Comparison of BLI sensograms of peptides **ACE $\alpha$ 1** and **A2\_v2**.



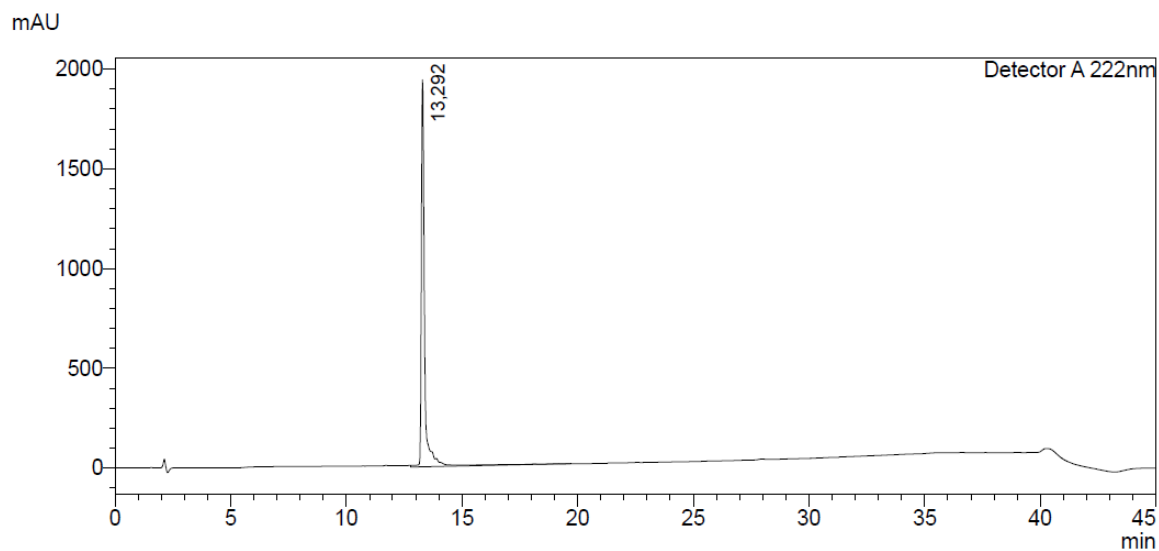

**Figure S4.** HPLC chromatogram of peptide ACE $\alpha$ 1.

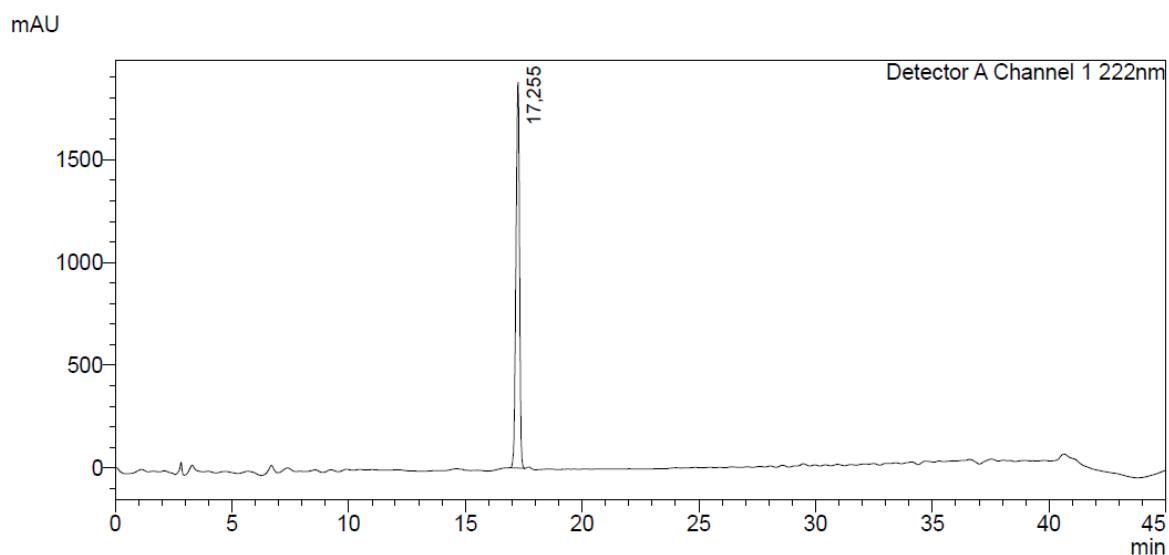

**Figure S5.** HPLC chromatogram of peptide A1.

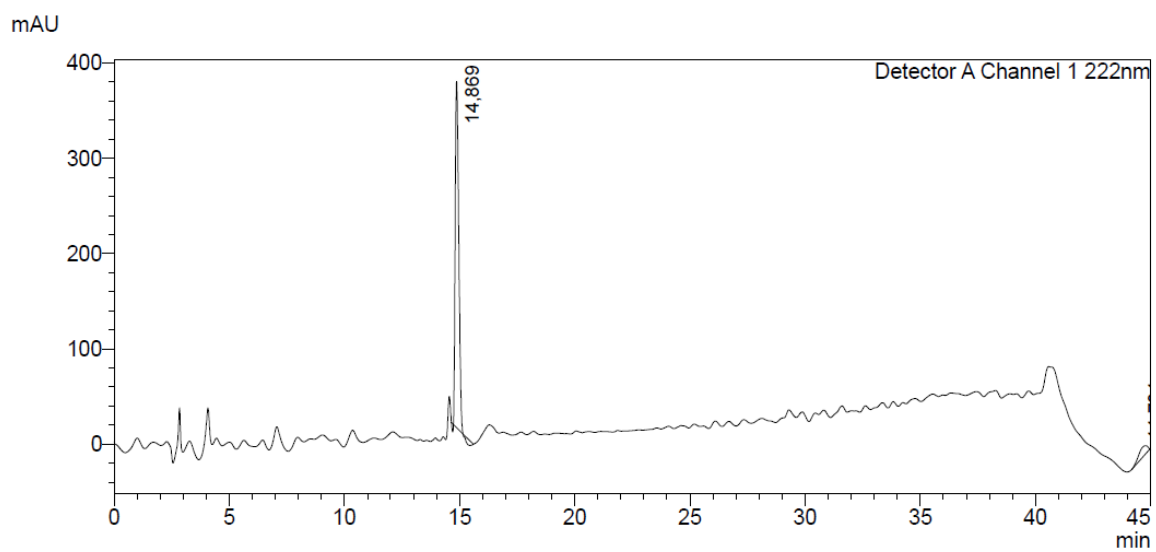

**Figure S6.** HPLC chromatogram of peptide A1a.

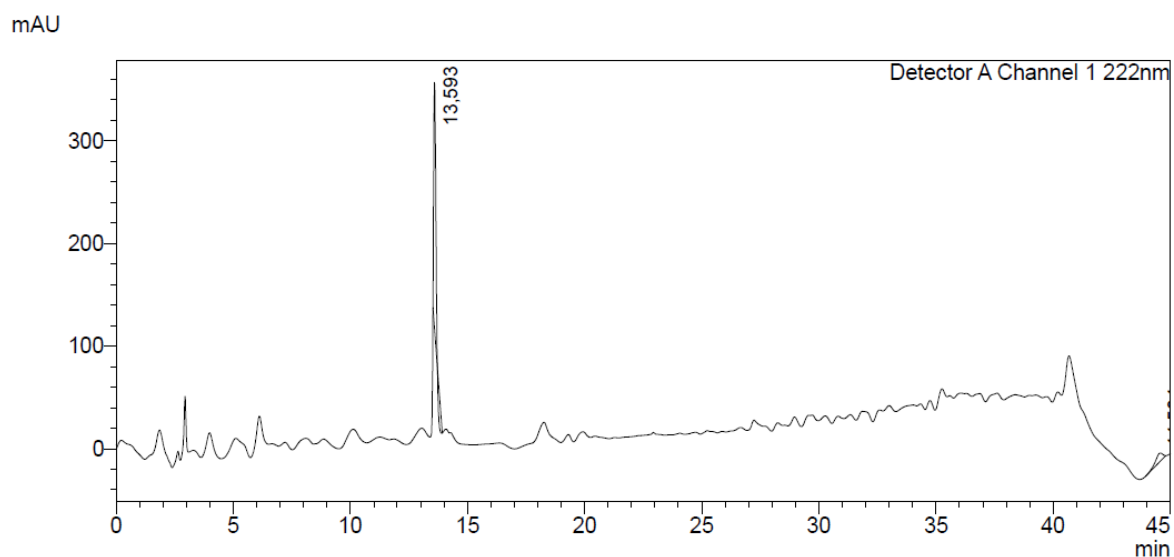

**Figure S7.** HPLC chromatogram of peptide **A1b**.

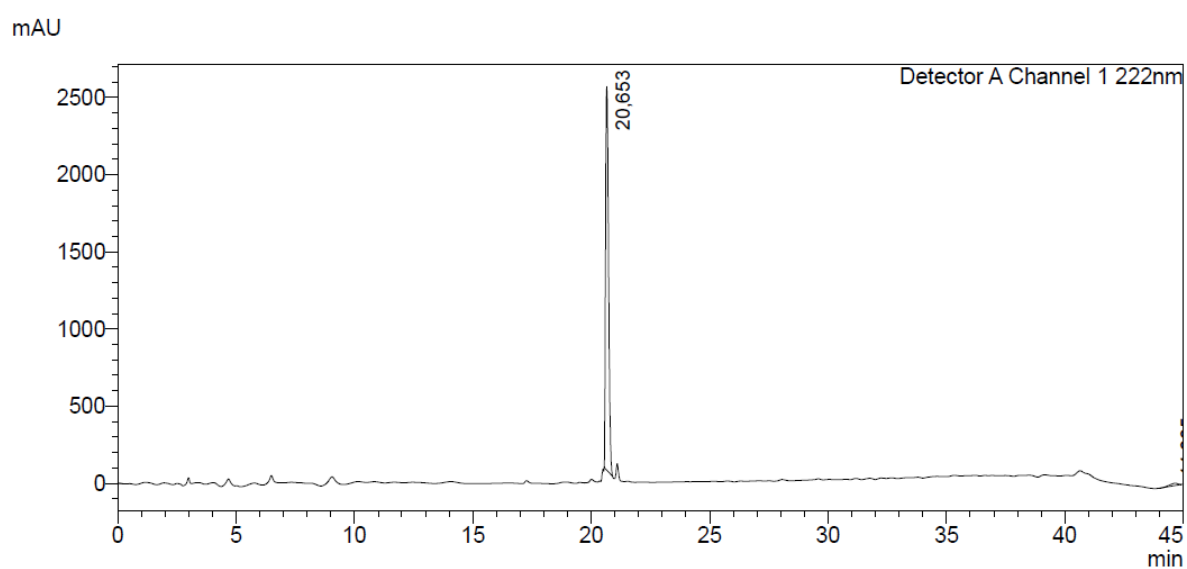

**Figure S8.** HPLC chromatogram of peptide **A1c**.

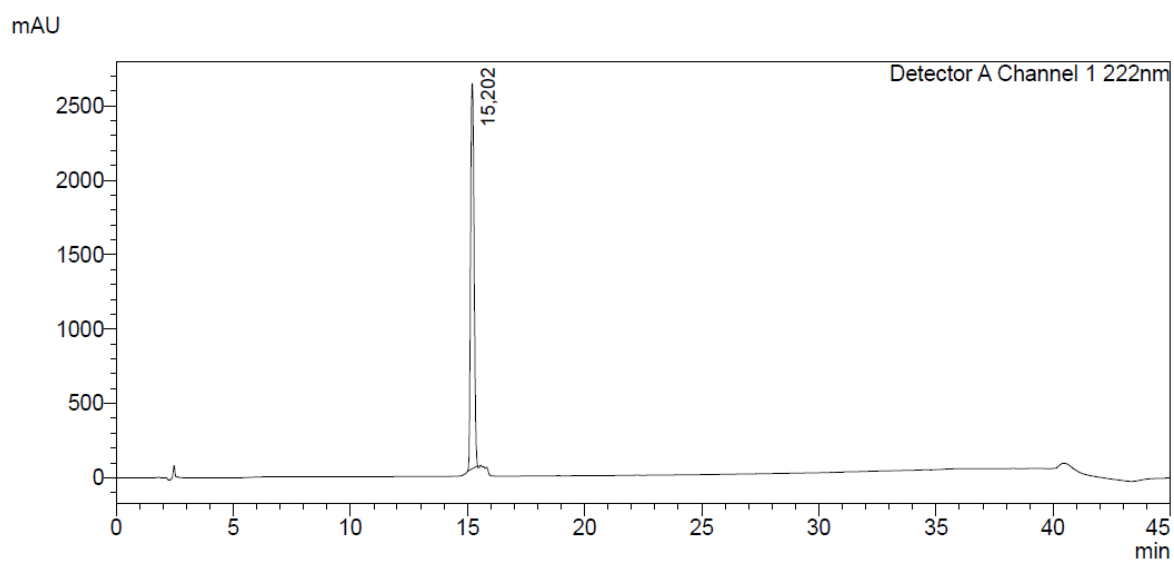

**Figure S9.** HPLC chromatogram of peptide **A1v1**.

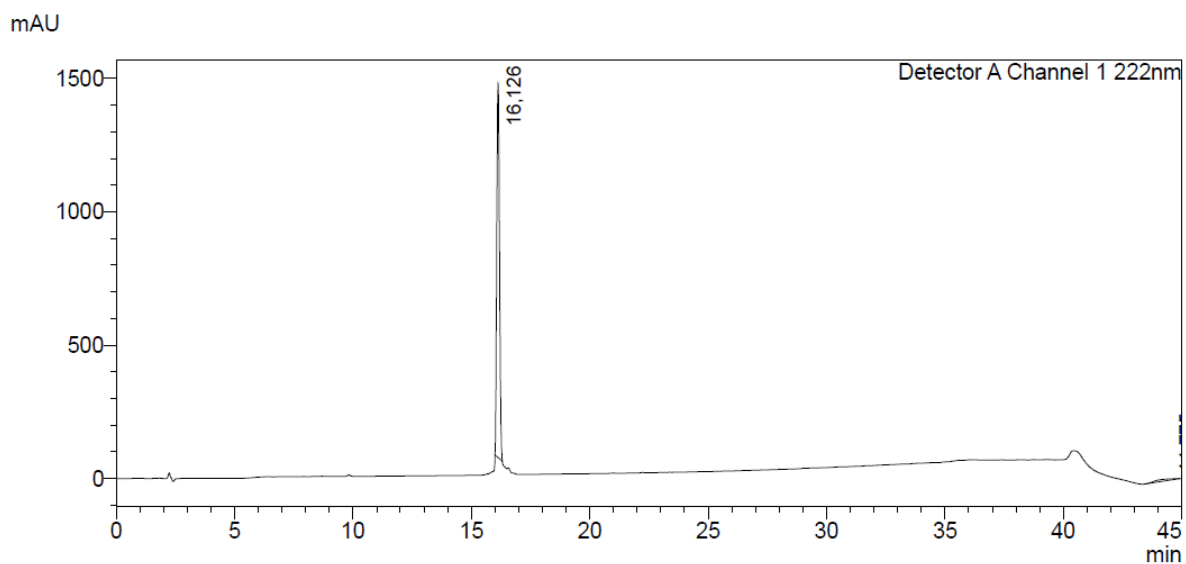

**Figure S10.** HPLC chromatogram of peptide A1v2.

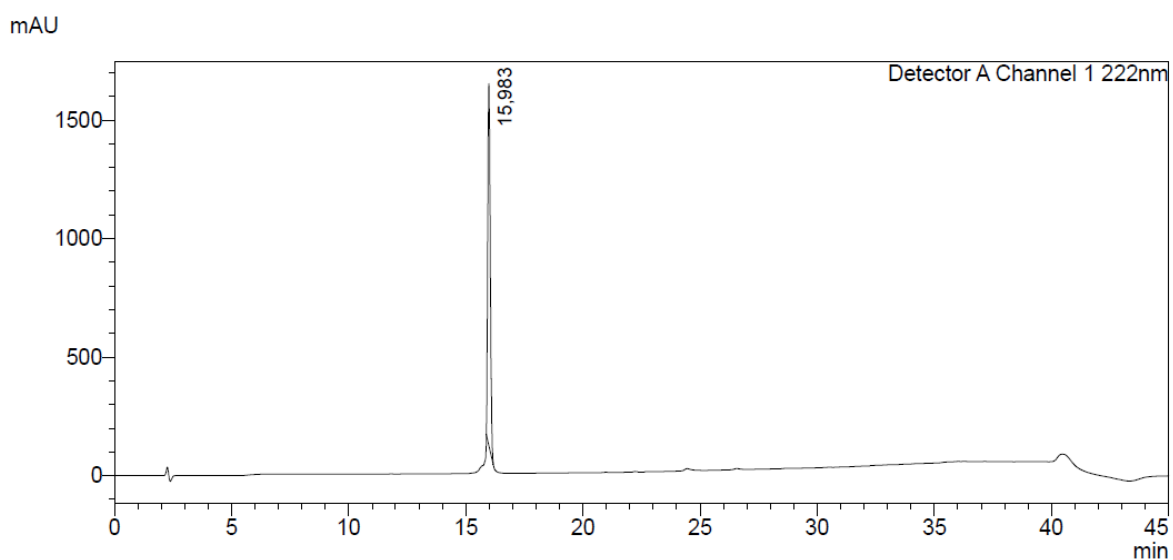

**Figure S11.** HPLC chromatogram of peptide A1v3.

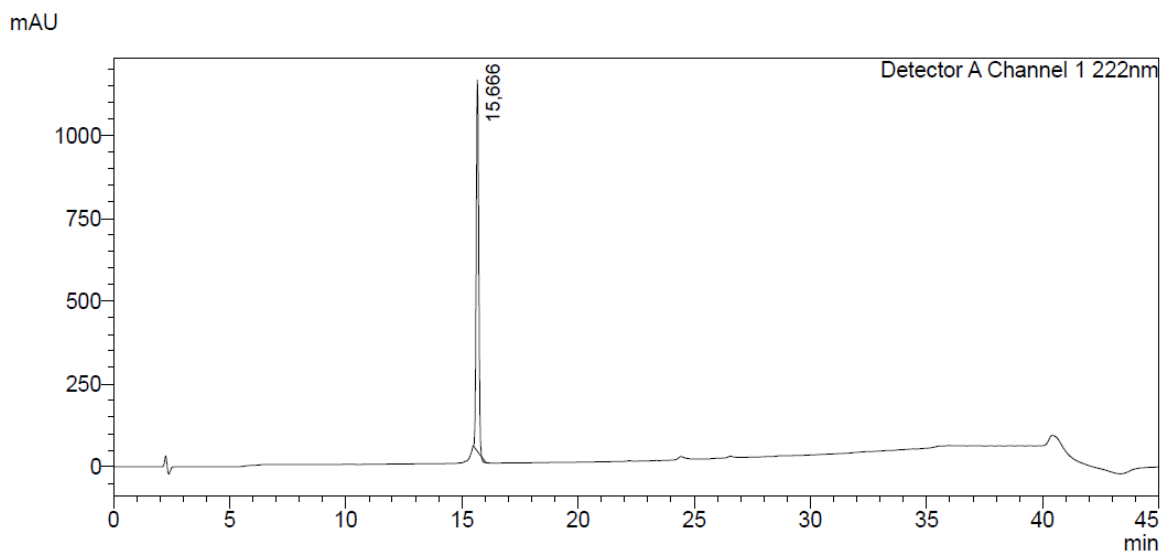

**Figure S12.** HPLC chromatogram of peptide A1v4.

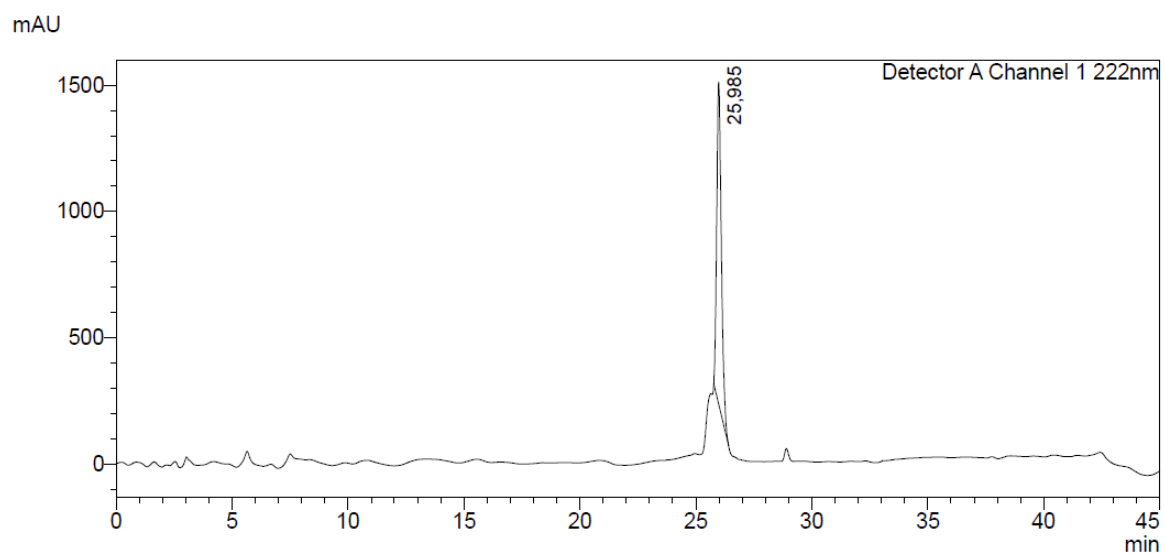

**Figure S13.** HPLC chromatogram of peptide **A2**.

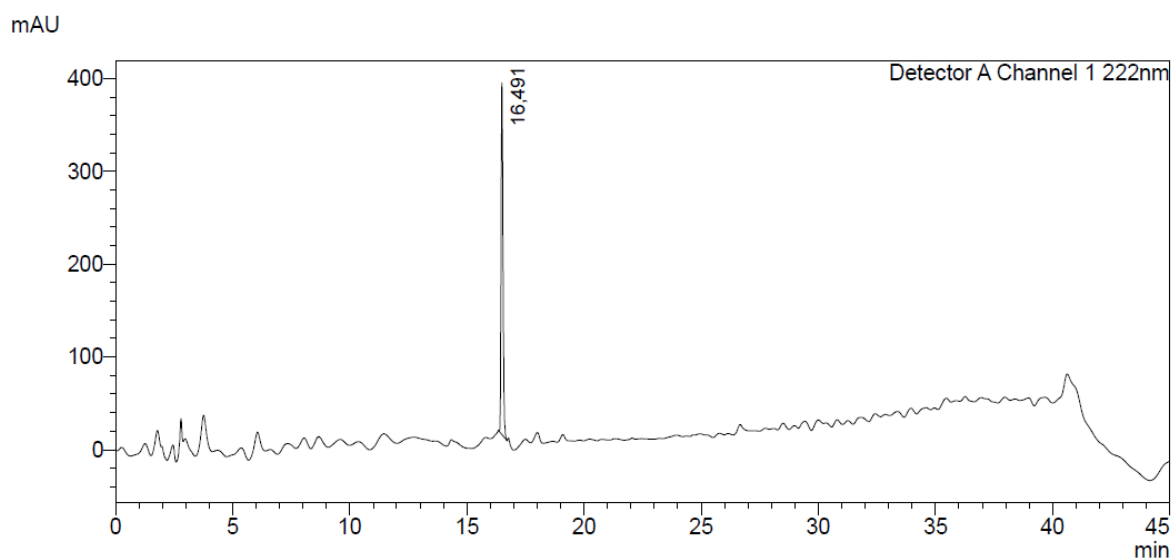

**Figure S14.** HPLC chromatogram of peptide **A2a**.

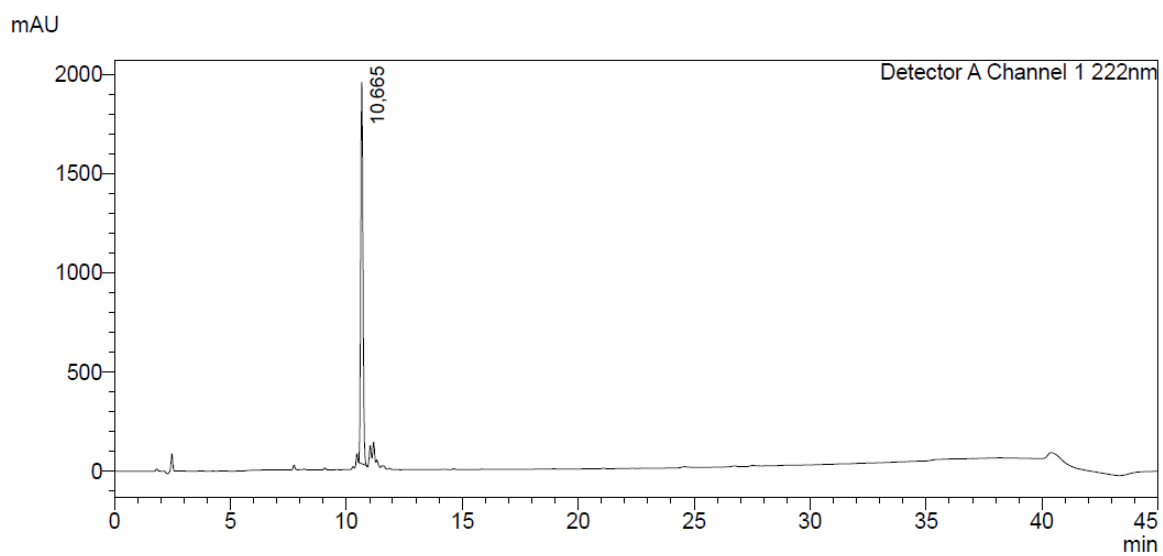

**Figure S15.** HPLC chromatogram of peptide **A2b**.

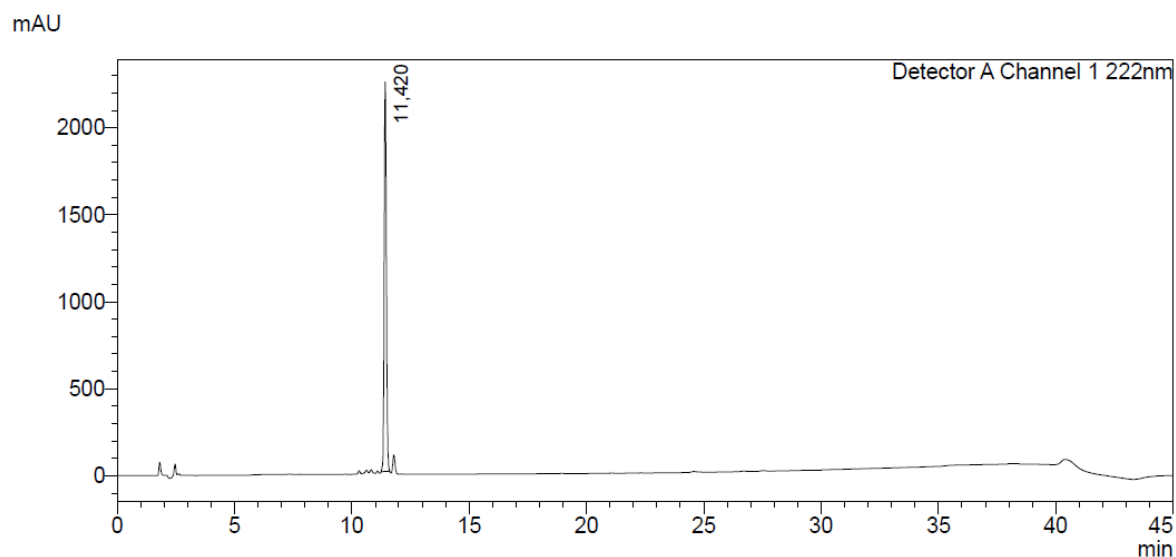

**Figure S16.** HPLC chromatogram of peptide **A2c**.

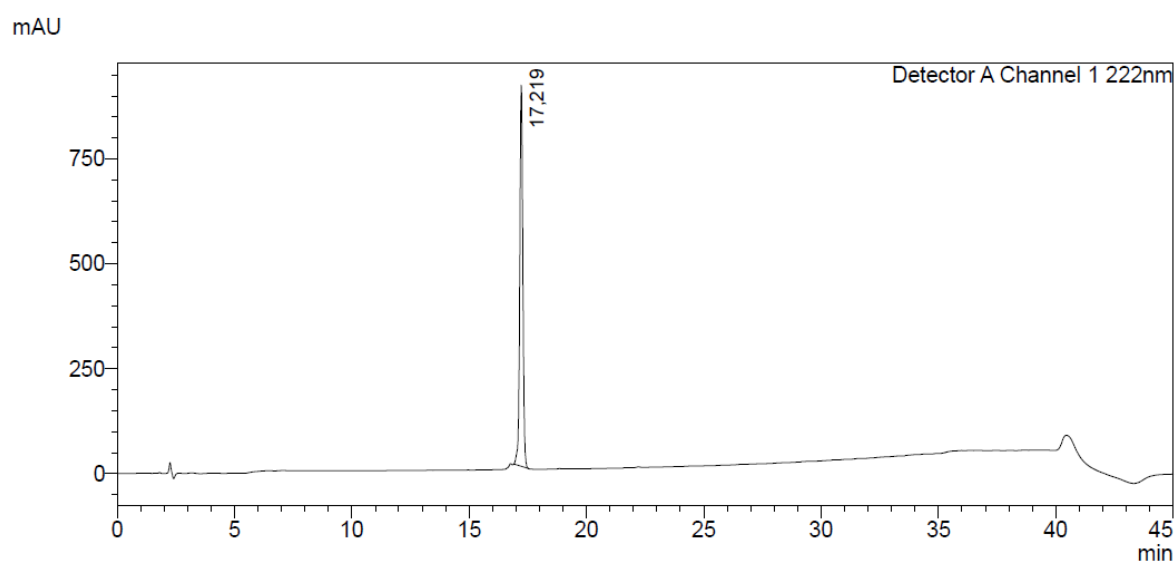

**Figure S17.** HPLC chromatogram of peptide **A2v1**.

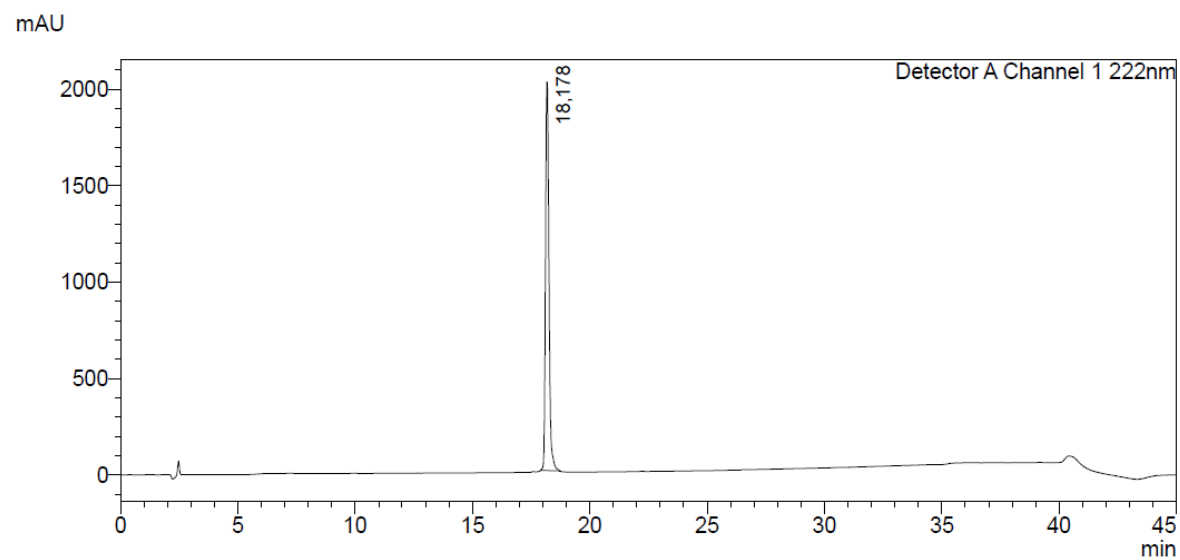

**Figure S18.** HPLC chromatogram of peptide **A2v2**.

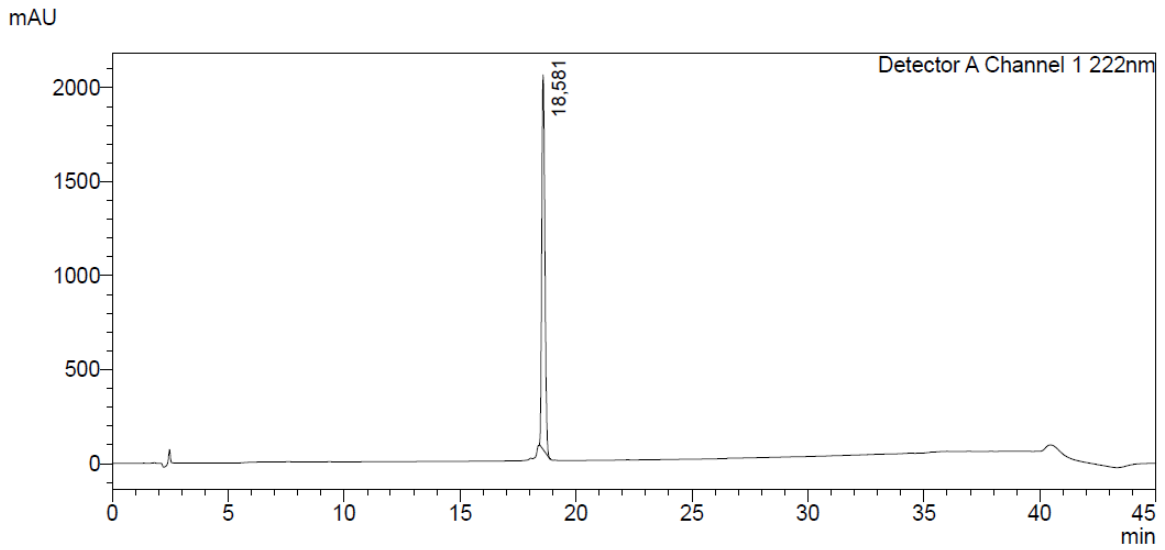

**Figure S19.** HPLC chromatogram of peptide **A2v3**.

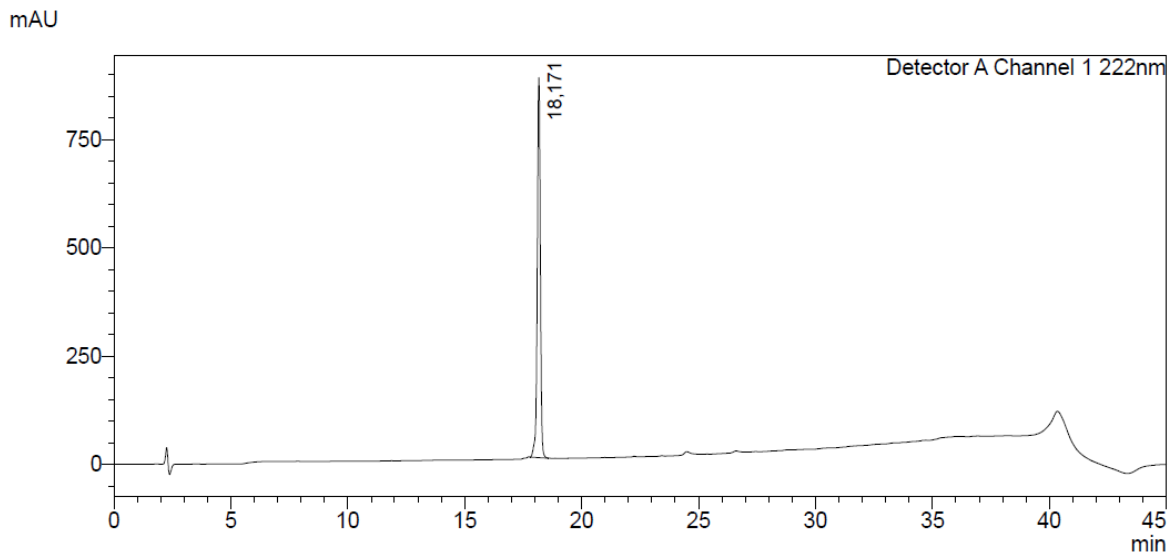

**Figure S20.** HPLC chromatogram of peptide **A2v4**.

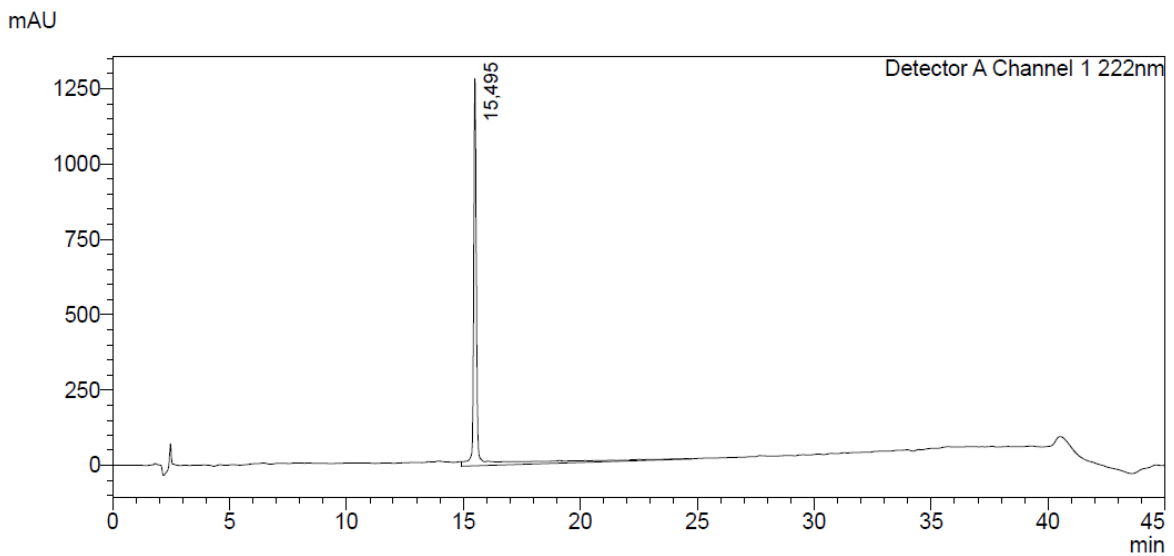

**Figure S21.** HPLC chromatogram of peptide **A3**.

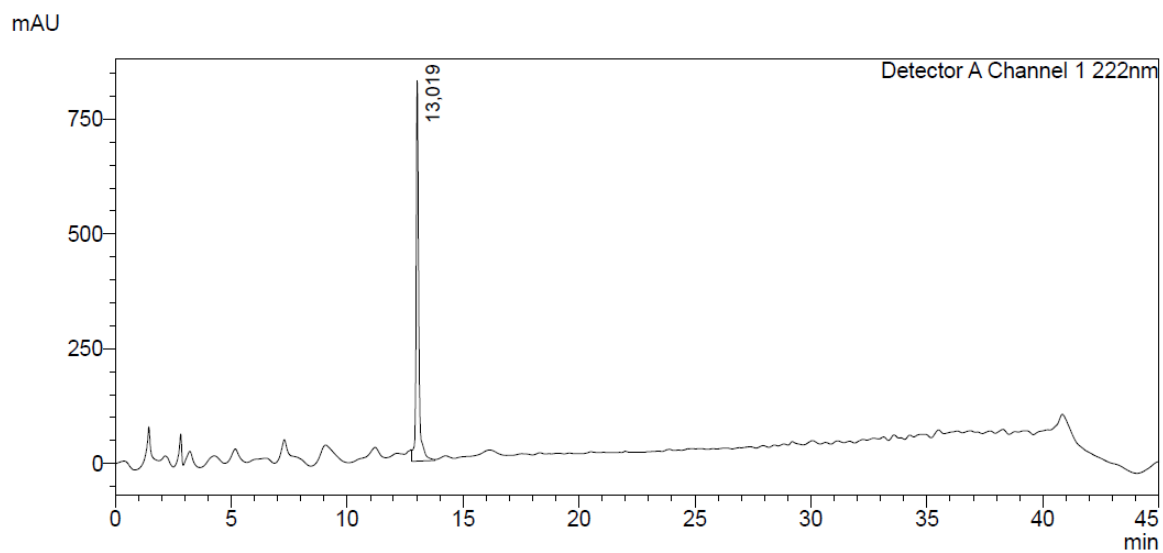

**Figure S22.** HPLC chromatogram of peptide A3a.

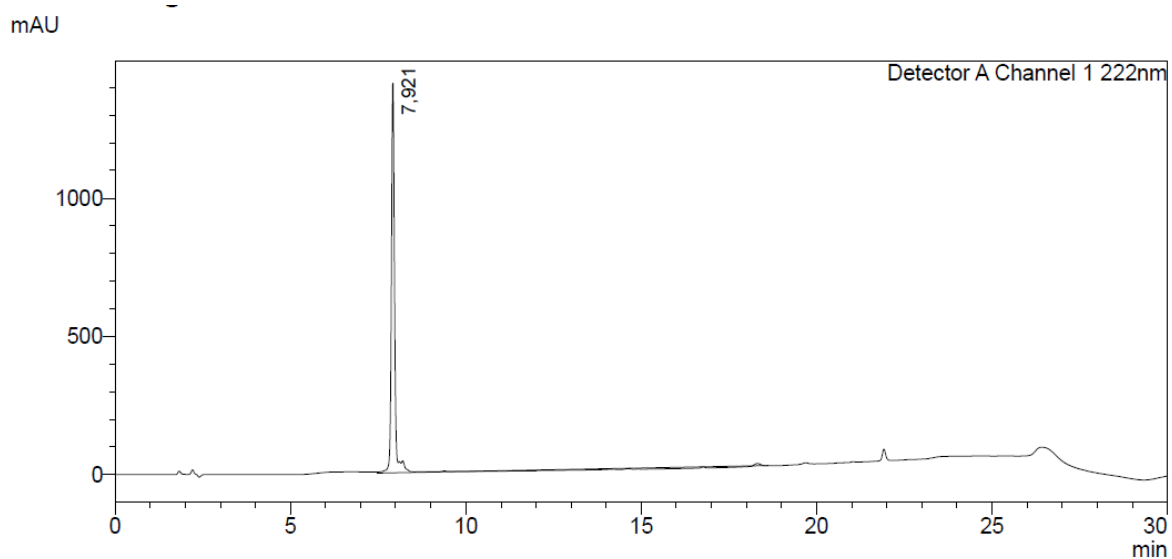

**Figure S23.** HPLC chromatogram of peptide A3b.

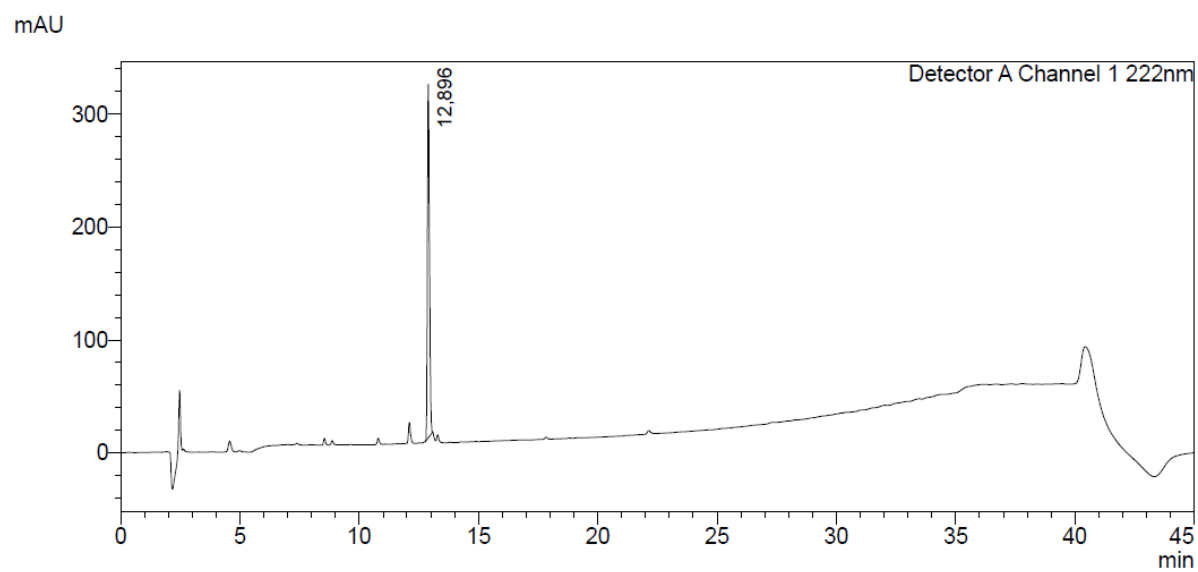

**Figure S24.** HPLC chromatogram of peptide A3c.

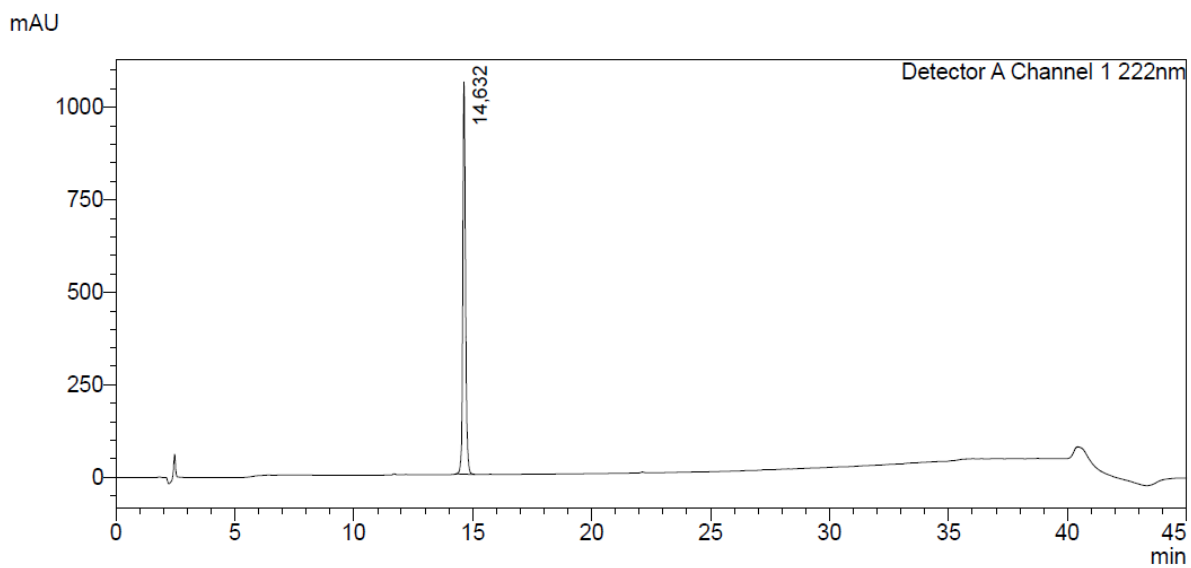

**Figure S25.** HPLC chromatogram of peptide 1.

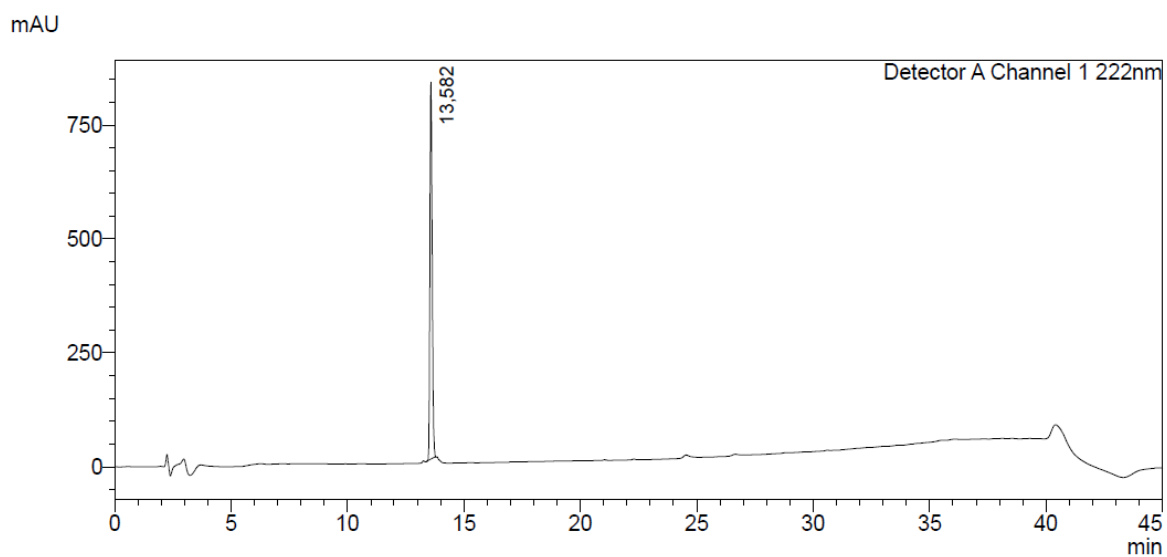

**Figure S26.** HPLC chromatogram of peptide 2.

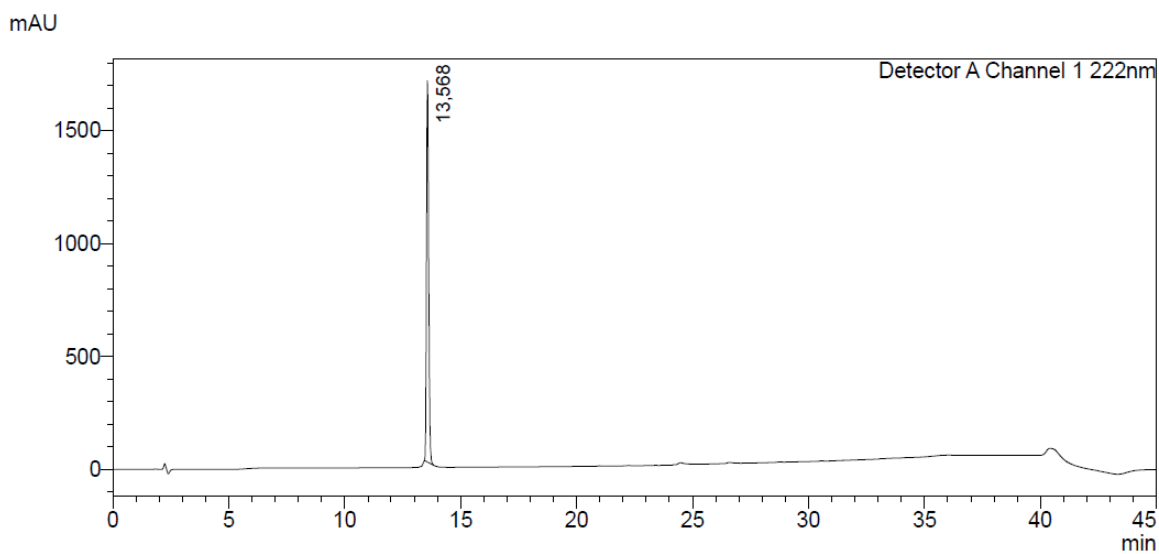

**Figure S27.** HPLC chromatogram of peptide 3.



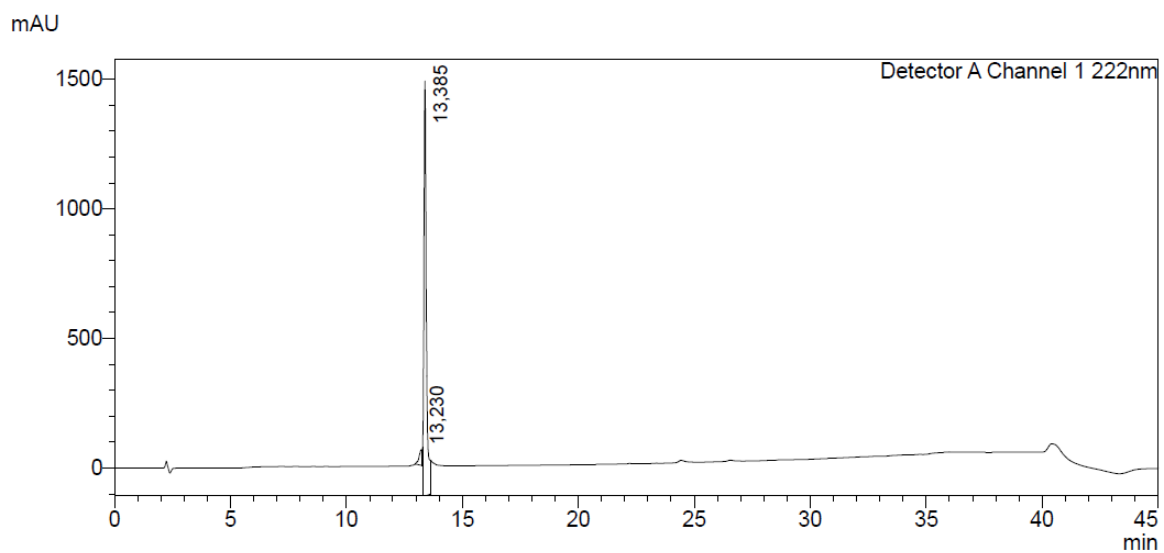

**Figure S28.** HPLC chromatogram of peptide 4.

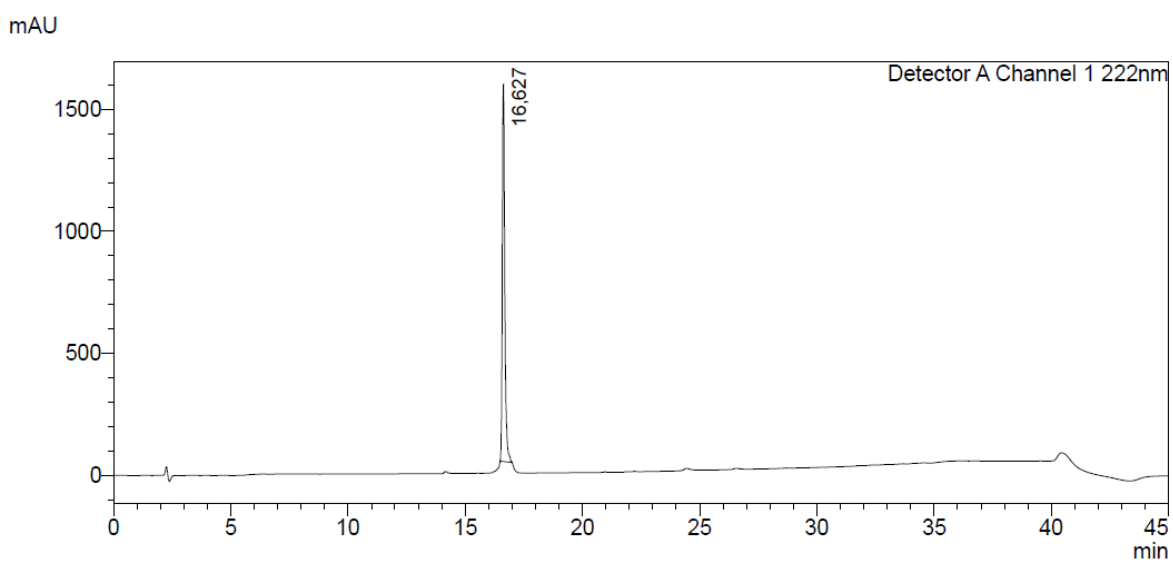

**Figure S29.** HPLC chromatogram of peptide 5.

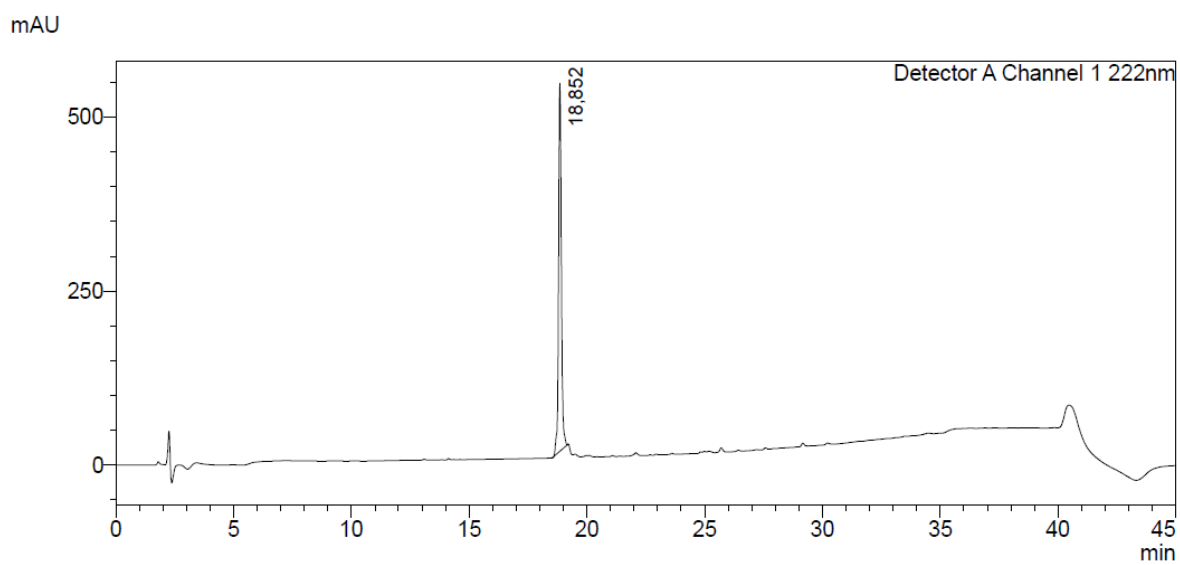

**Figure S30.** HPLC chromatogram of peptide 6.

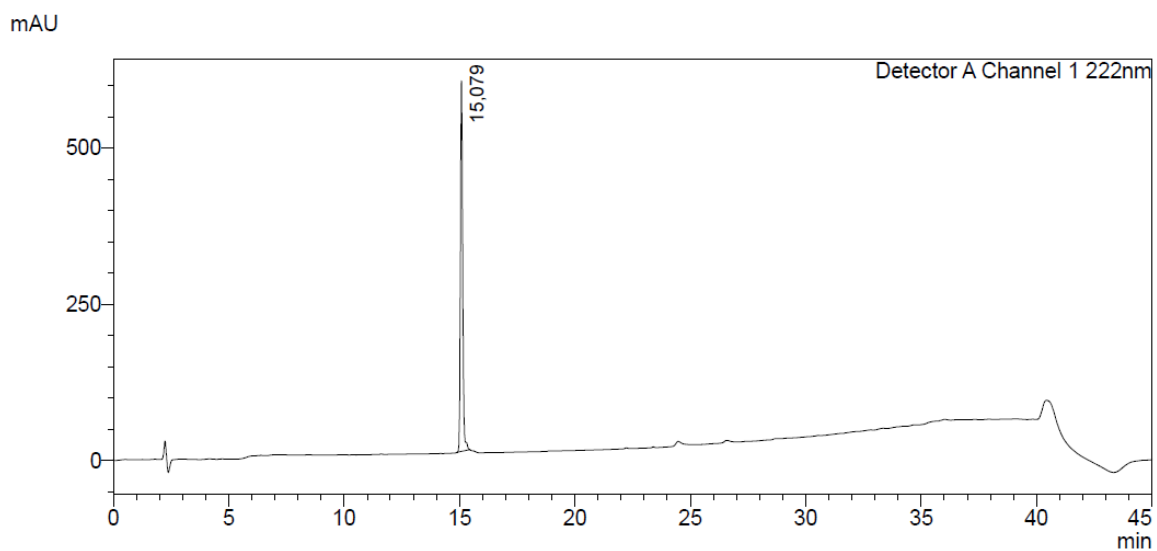

**Figure S31.** HPLC chromatogram of peptide 7.

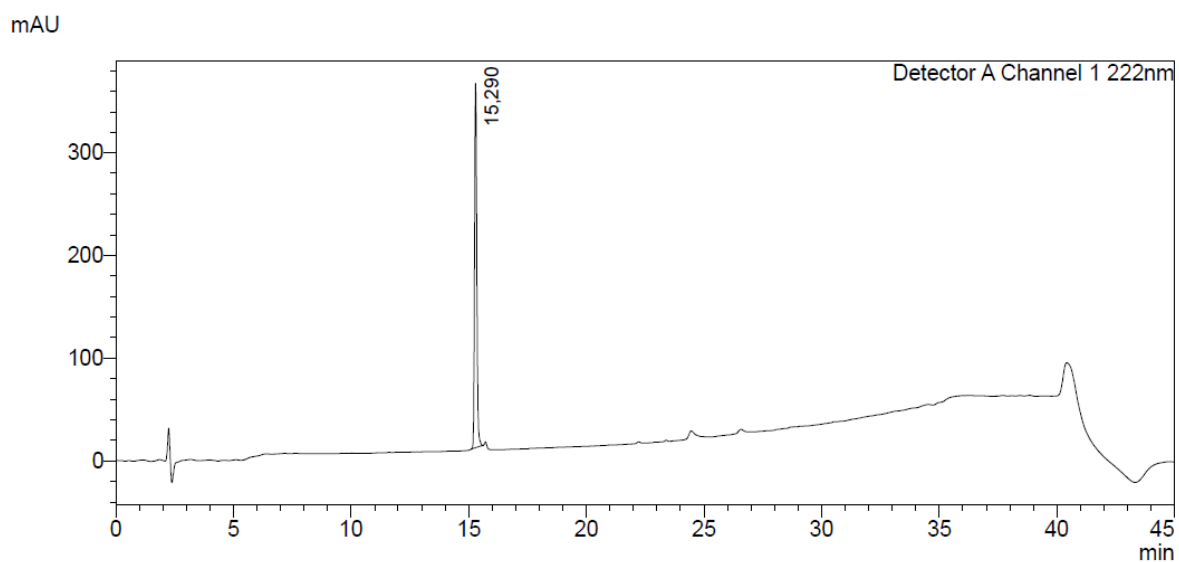

**Figure S32.** HPLC chromatogram of peptide 8.

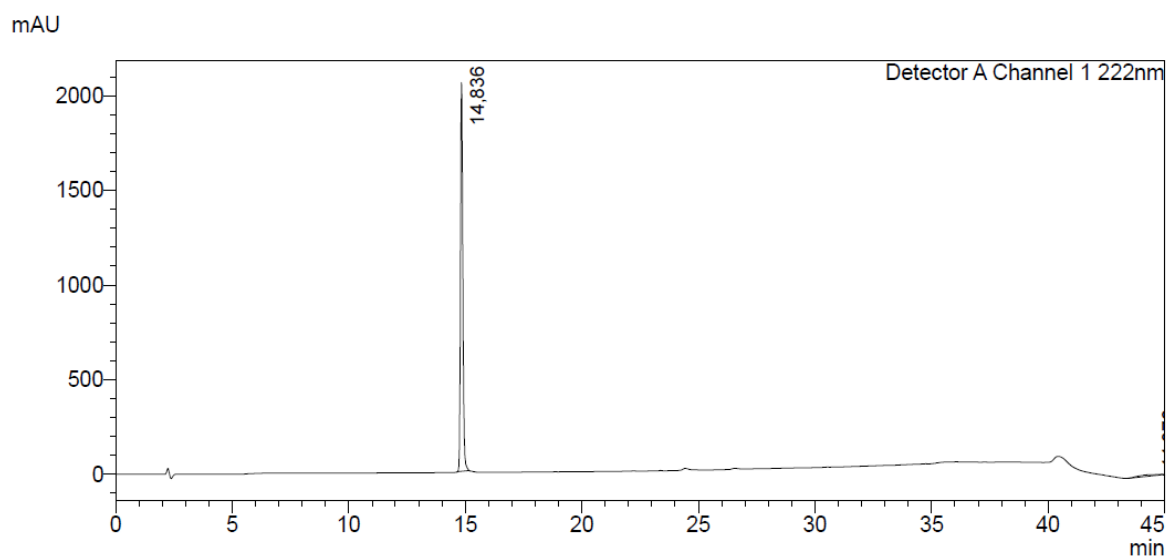

**Figure S33.** HPLC chromatogram of peptide 9.

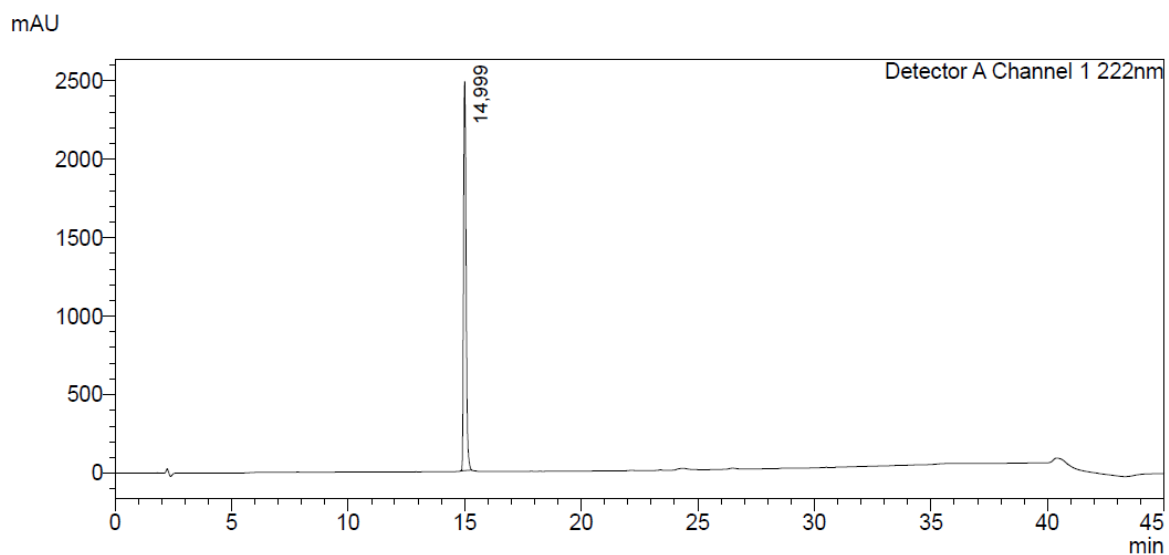

**Figure S34.** HPLC chromatogram of peptide 10.

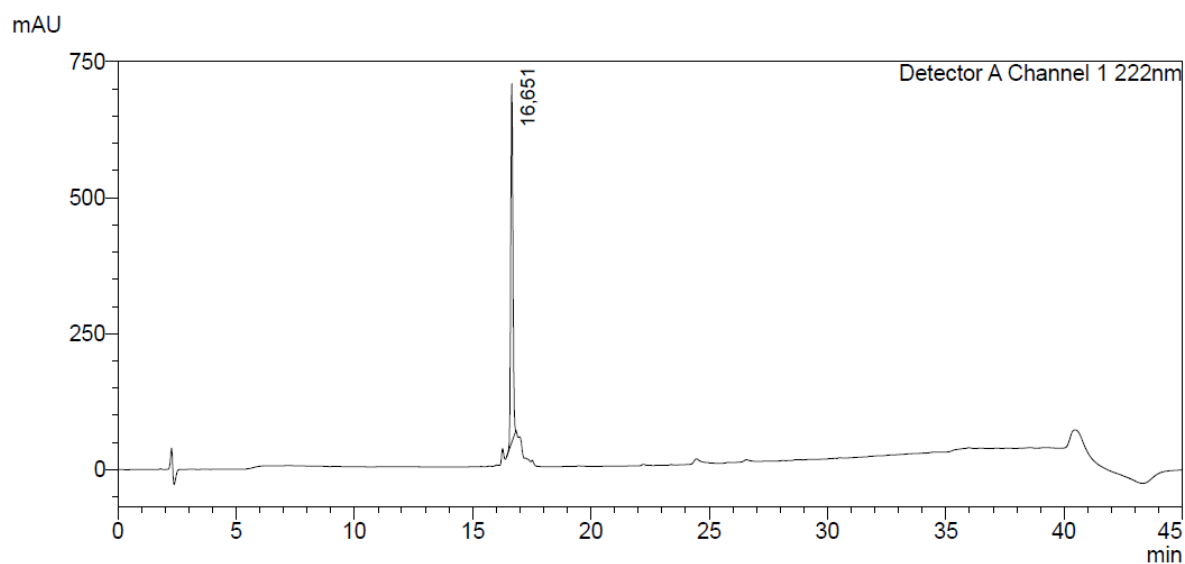

**Figure S35.** HPLC chromatogram of peptide 11.

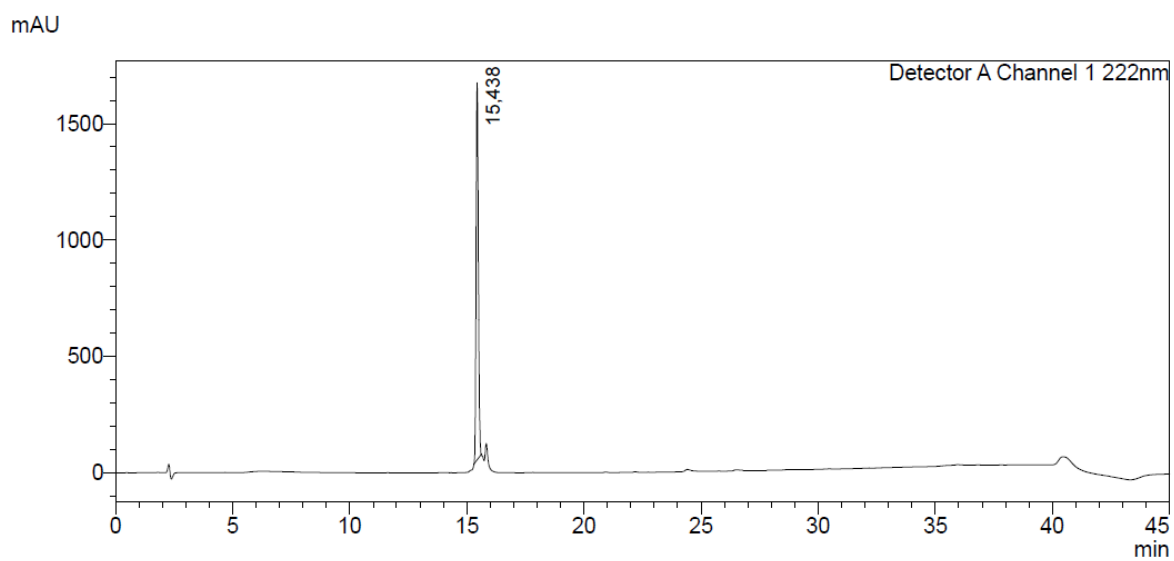

**Figure S36.** HPLC chromatogram of peptide 12.

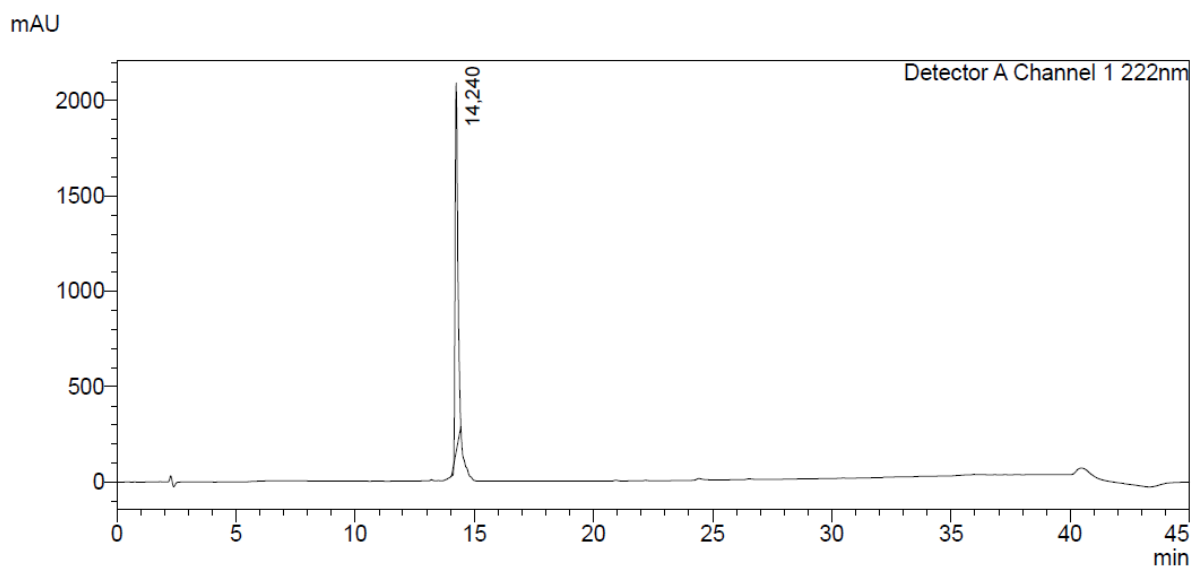

**Figure S37.** HPLC chromatogram of peptide 13.

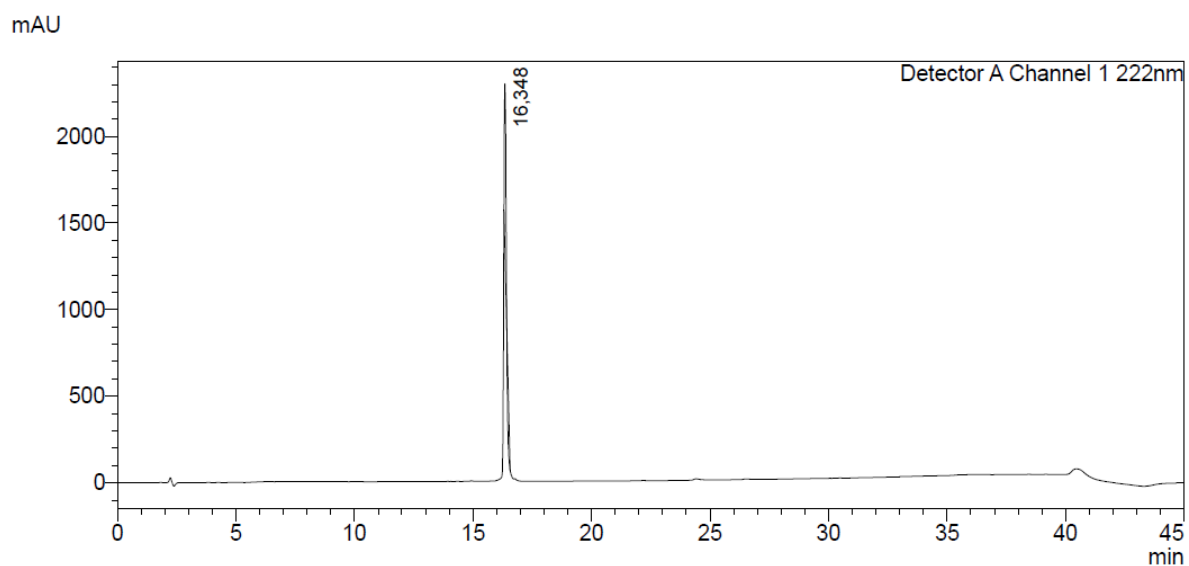

**Figure S38.** HPLC chromatogram of peptide 14.

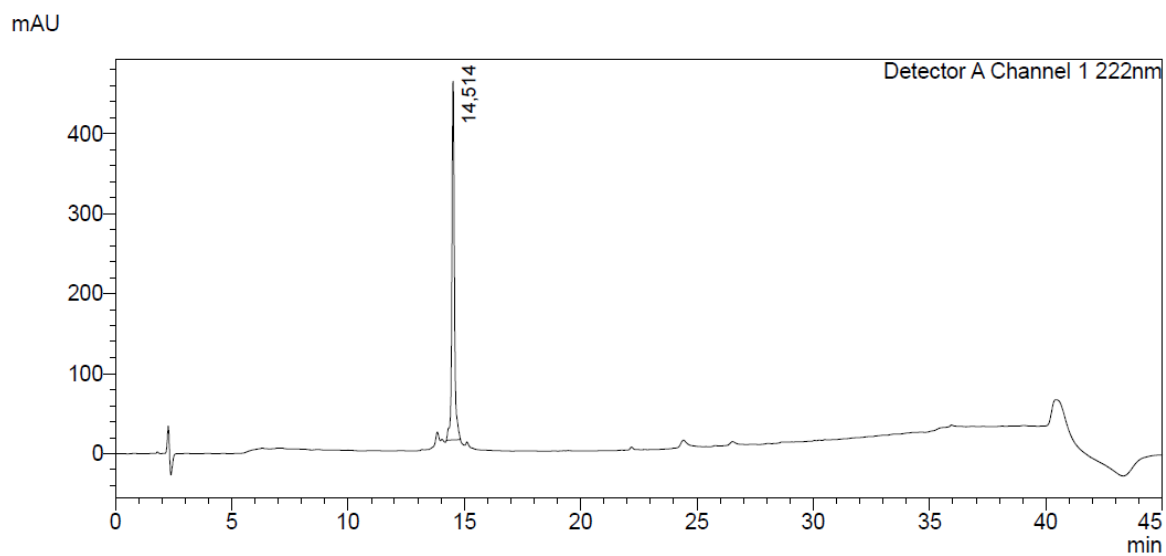

**Figure S39.** HPLC chromatogram of peptide 15.

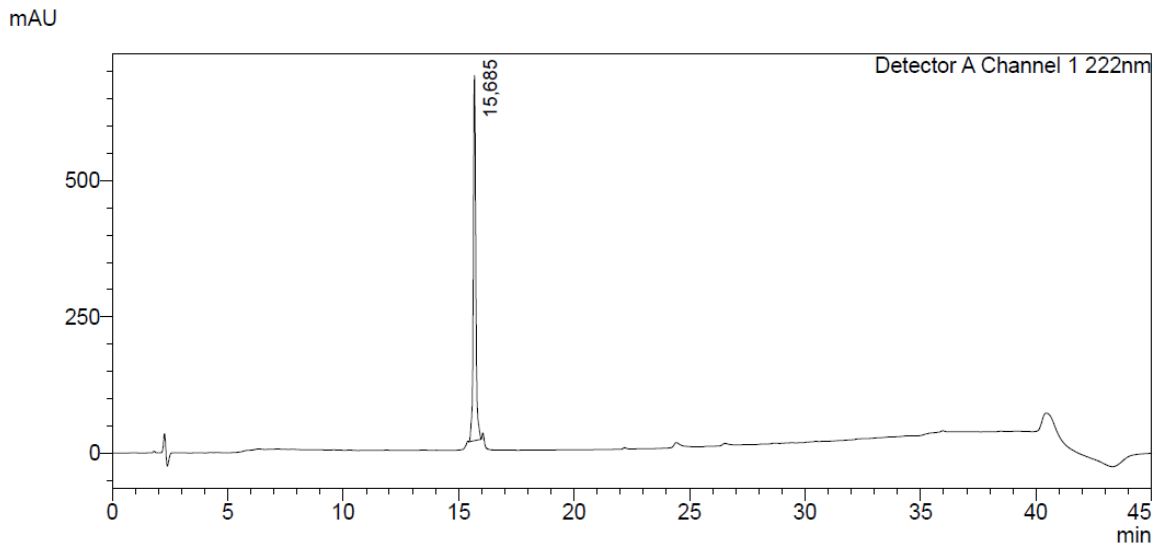

**Figure S40.** HPLC chromatogram of peptide **16**.

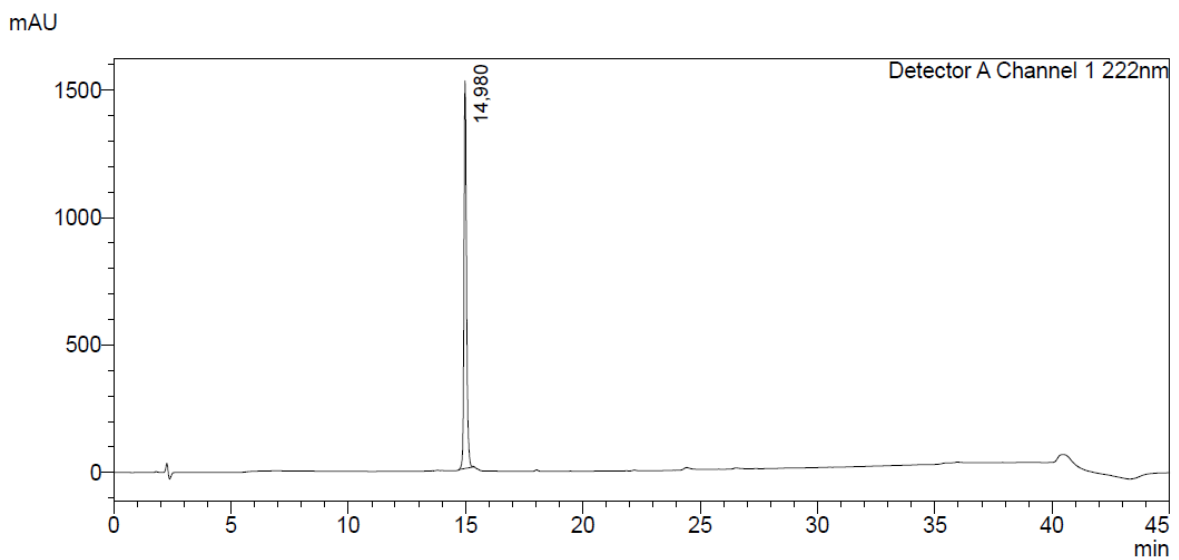

**Figure S41.** HPLC chromatogram of peptide **17**.

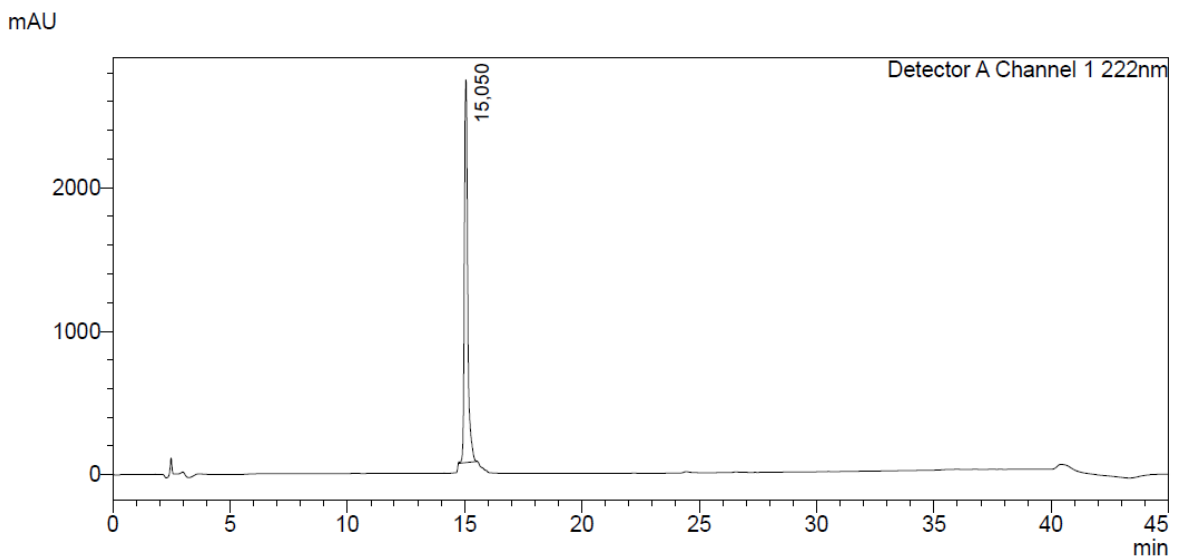

**Figure S42.** HPLC chromatogram of peptide **18**.

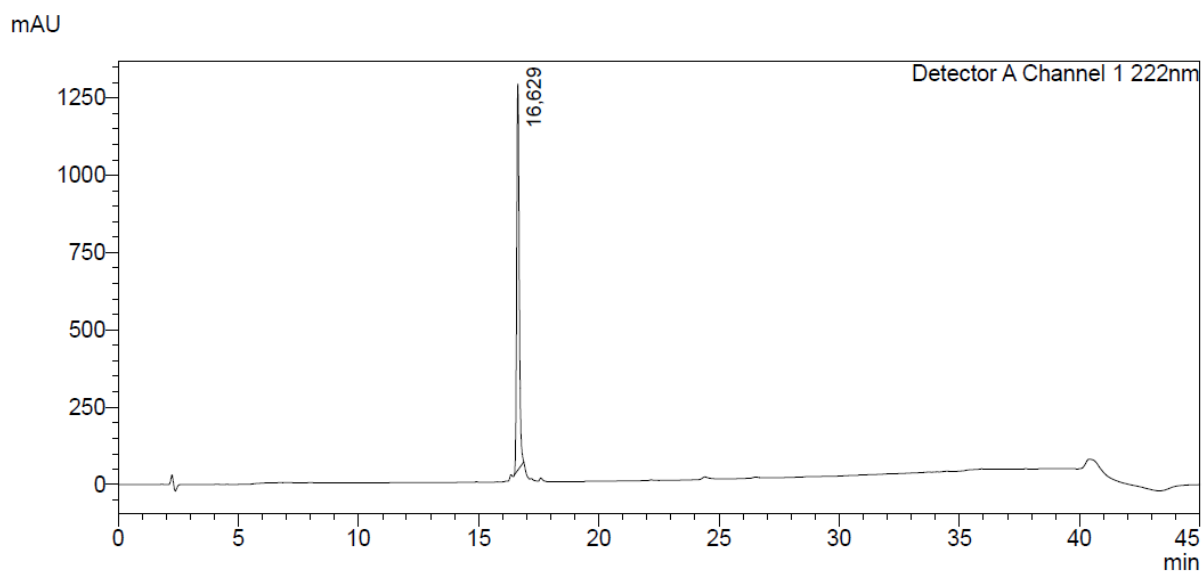

**Figure S43.** HPLC chromatogram of peptide 19.

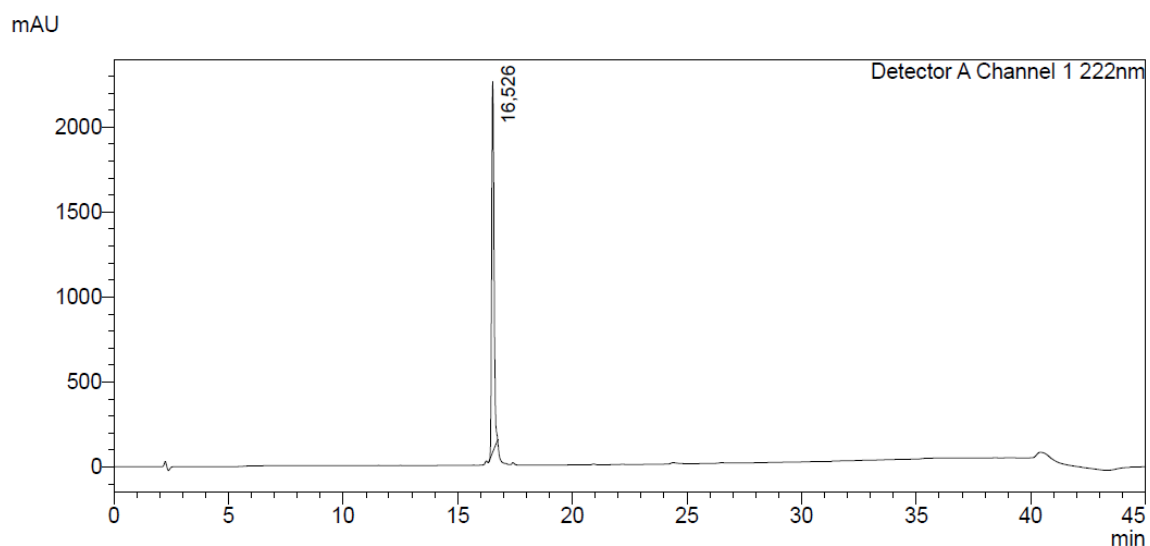

**Figure S44.** HPLC chromatogram of peptide 20.

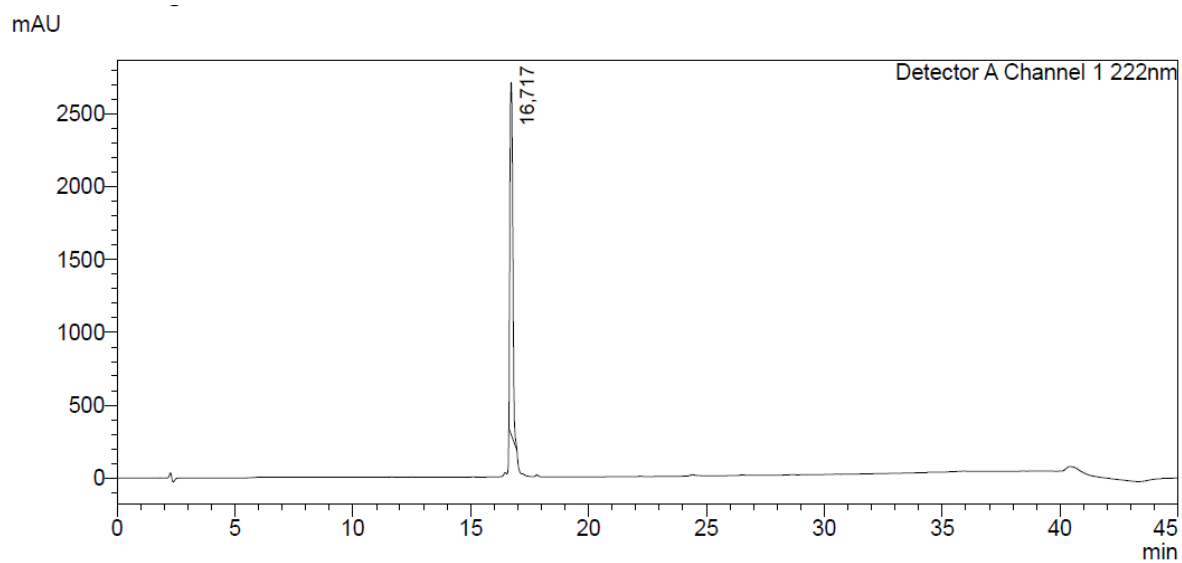

**Figure S45.** HPLC chromatogram of peptide 21.

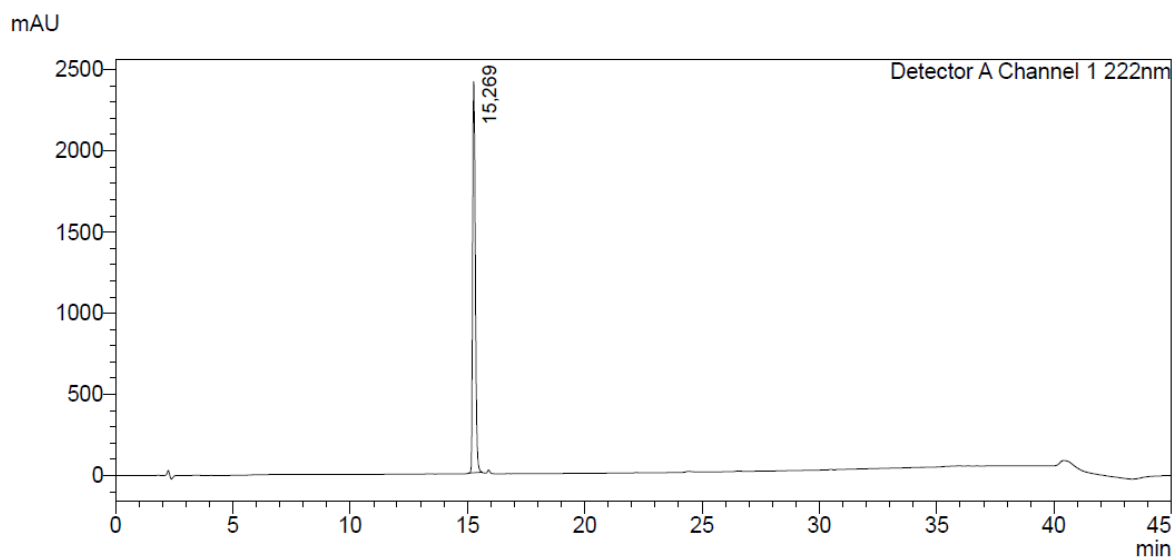

**Figure S46.** HPLC chromatogram of peptide **22**.

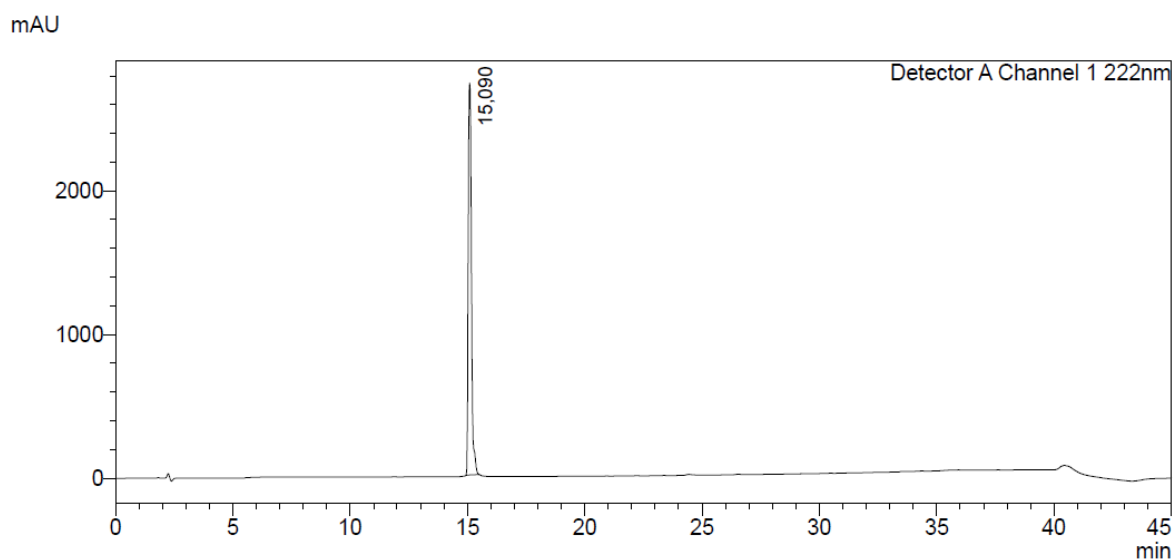

**Figure S47.** HPLC chromatogram of peptide **23**.

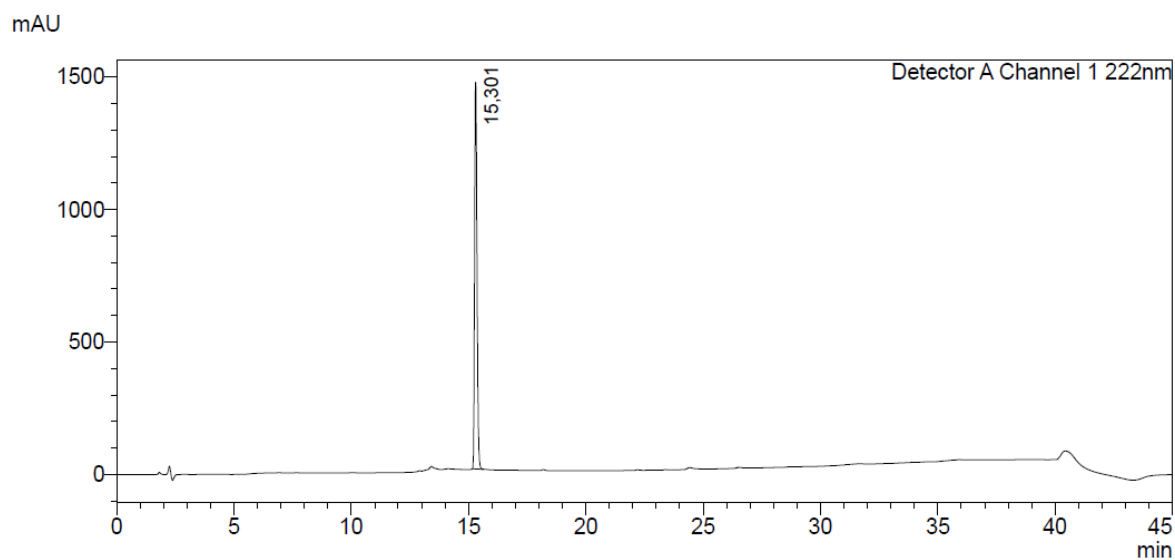

**Figure S48.** HPLC chromatogram of peptide **24**.

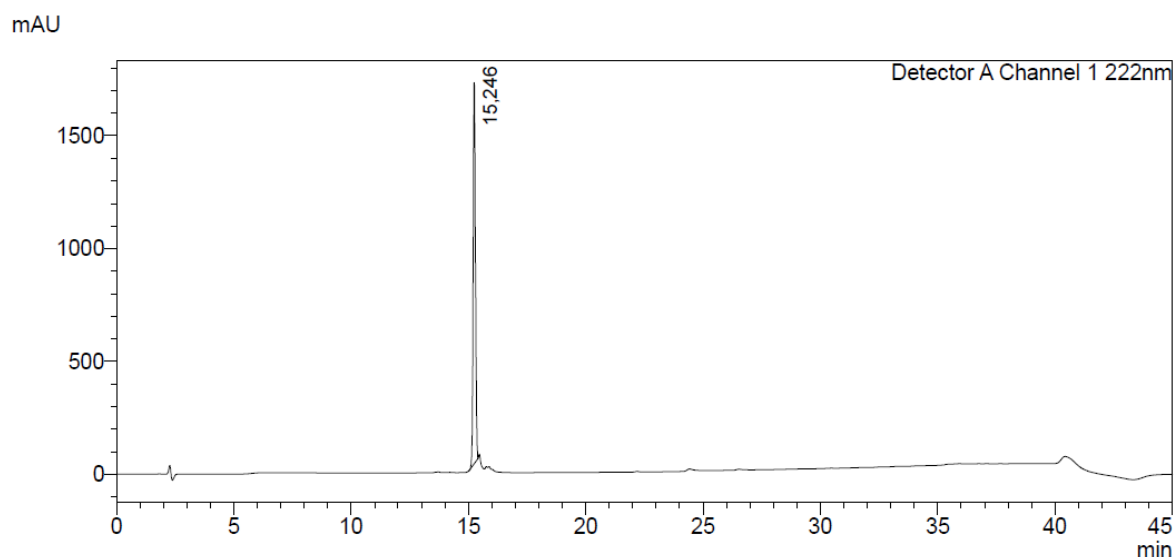

**Figure S49.** HPLC chromatogram of peptide 25.

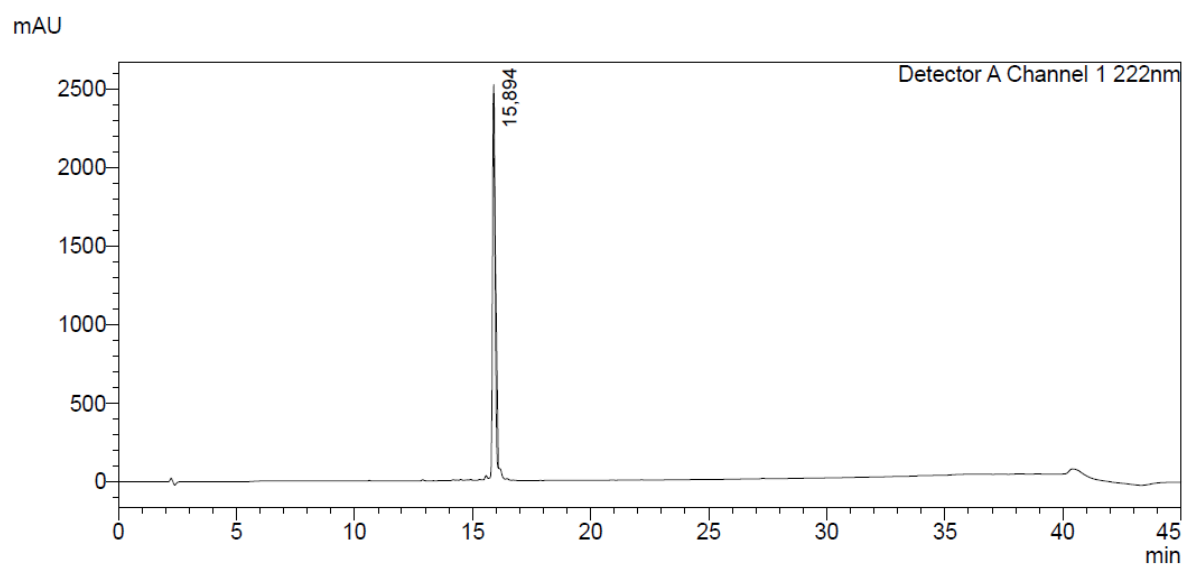

**Figure S50.** HPLC chromatogram of peptide 26.

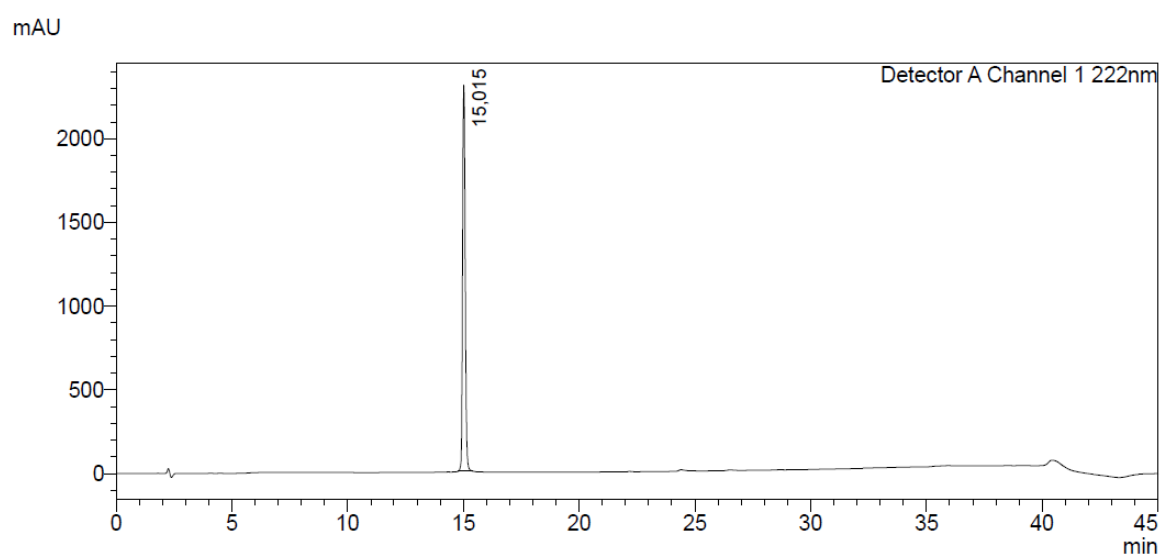

**Figure S51.** HPLC chromatogram of peptide 27.



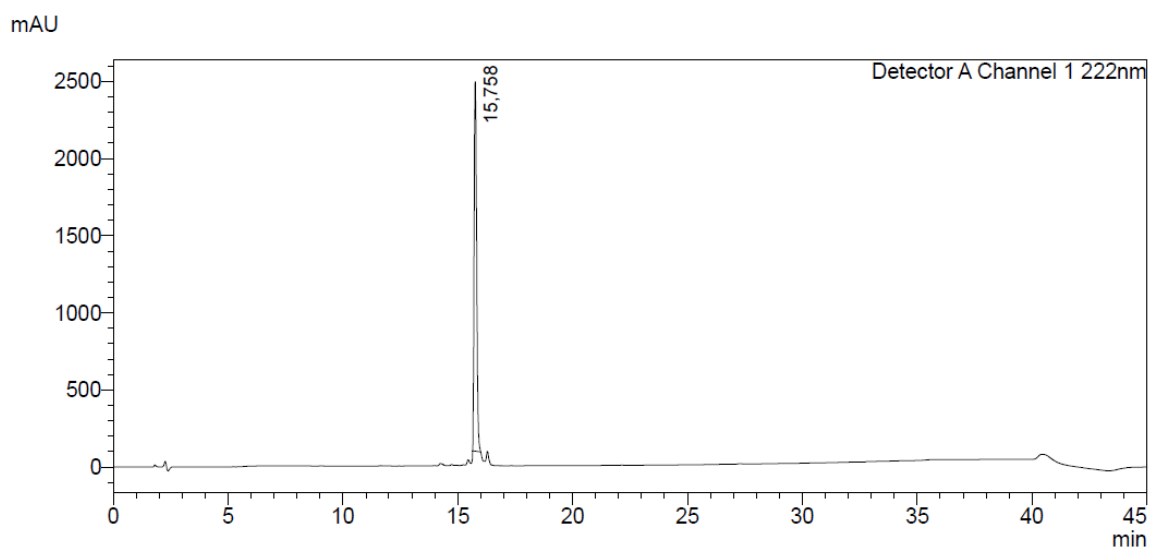

**Figure S52.** HPLC chromatogram of peptide **28**.

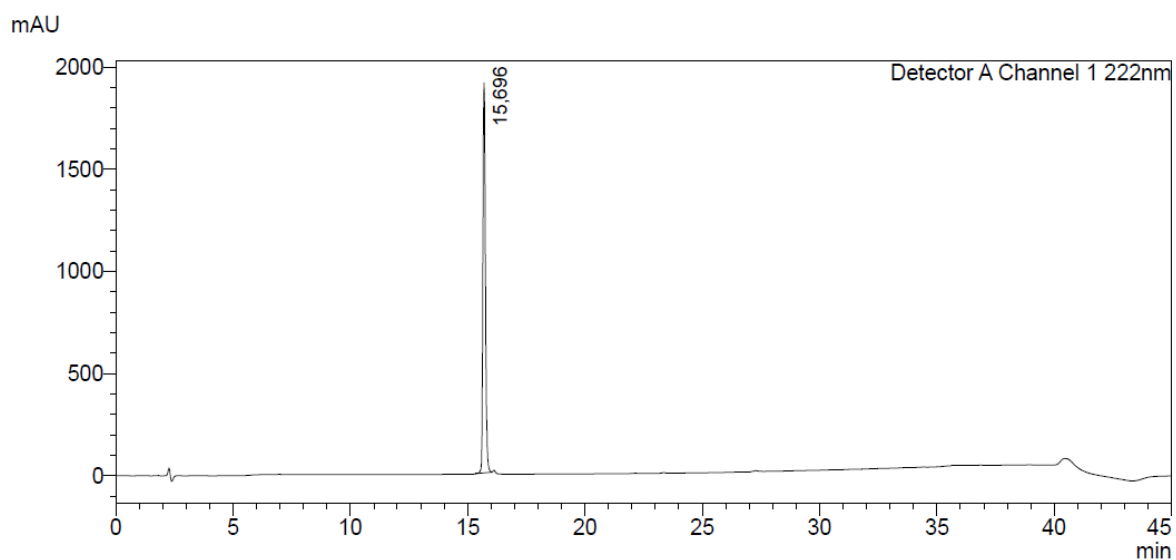

**Figure S53.** HPLC chromatogram of peptide **29**.

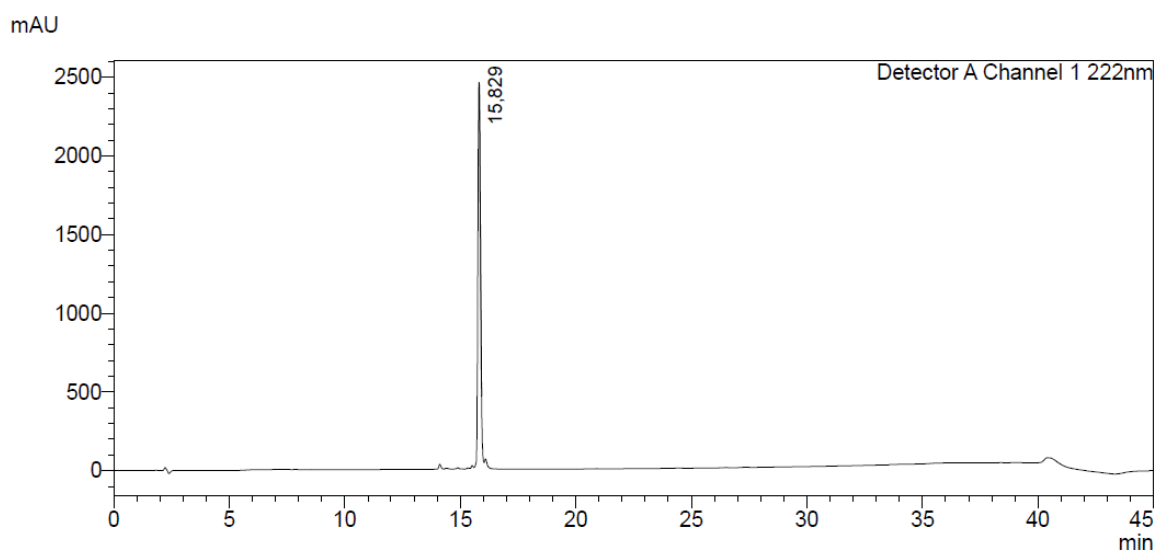

**Figure S54.** HPLC chromatogram of peptide **30**.

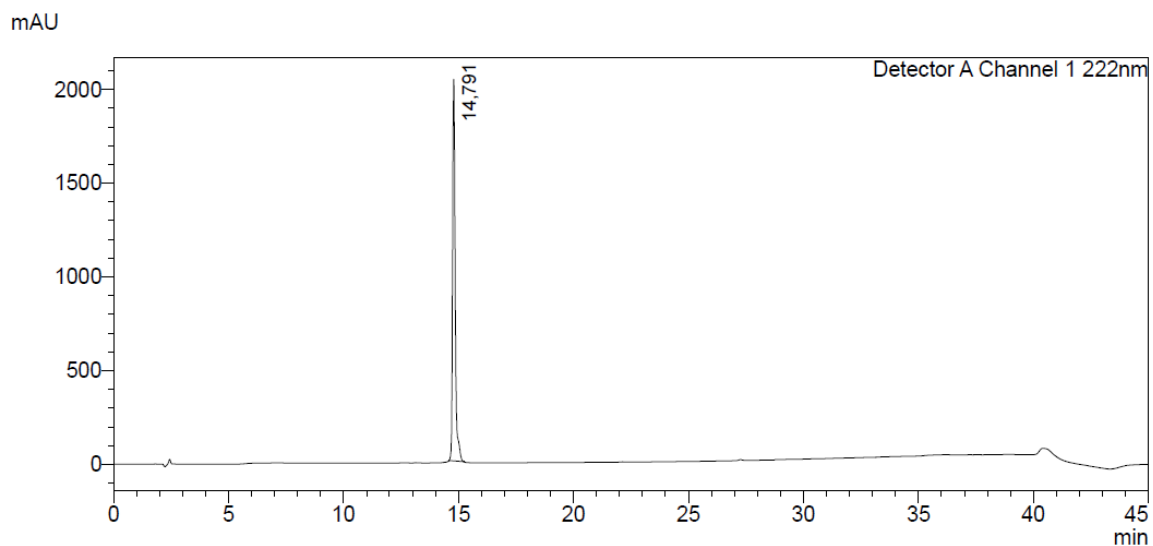

**Figure S55.** HPLC chromatogram of peptide **31**.

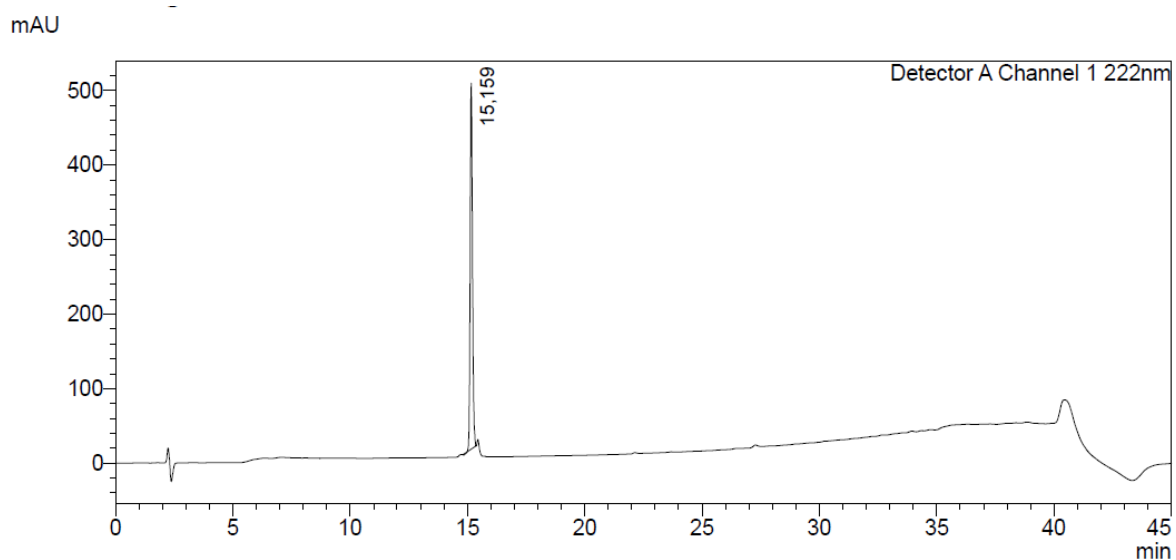

**Figure S56.** HPLC chromatogram of peptide **32**.

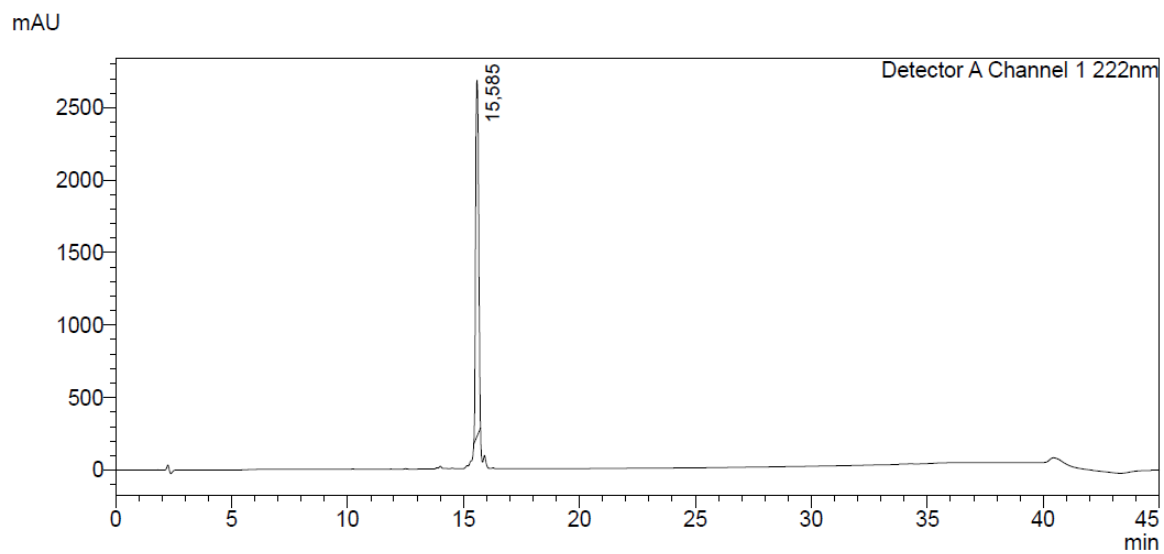

**Figure S57.** HPLC chromatogram of peptide **33**.

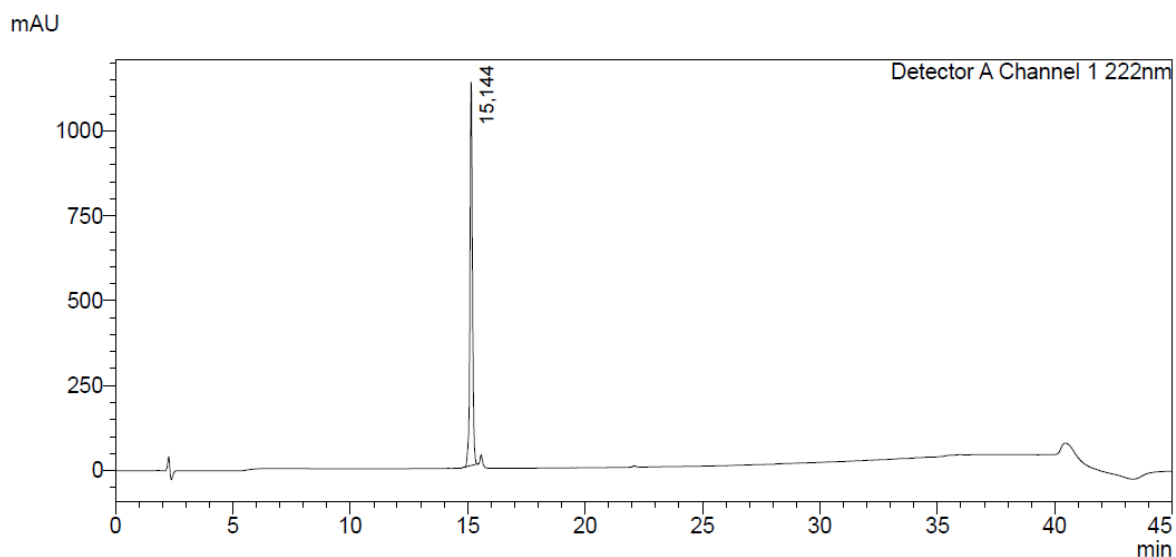

**Figure S58.** HPLC chromatogram of peptide **34**.

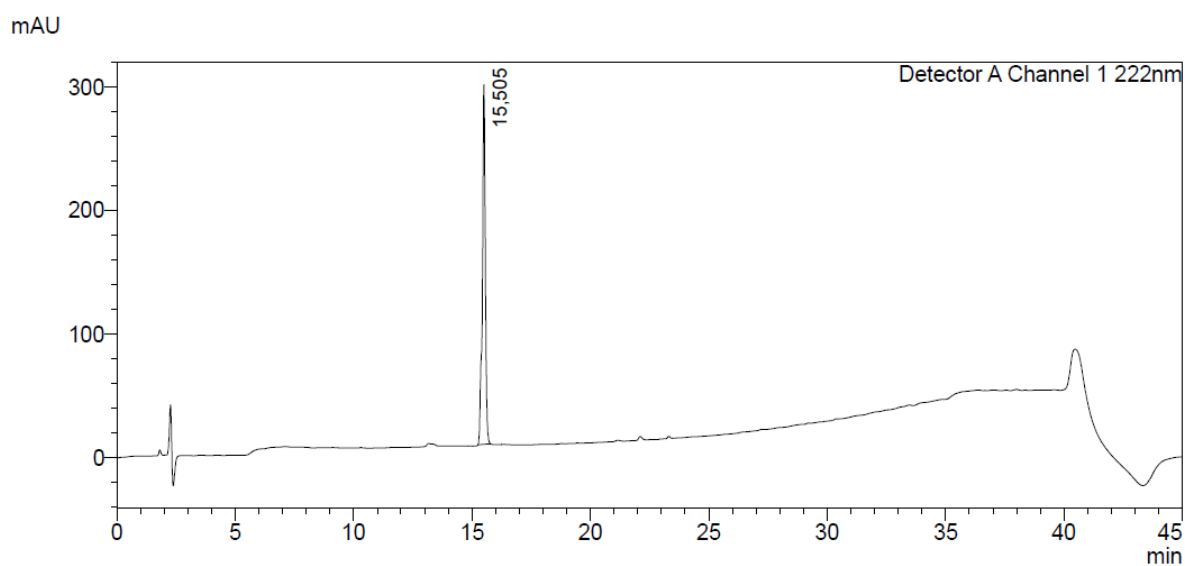

**Figure S59.** HPLC chromatogram of peptide **35**.

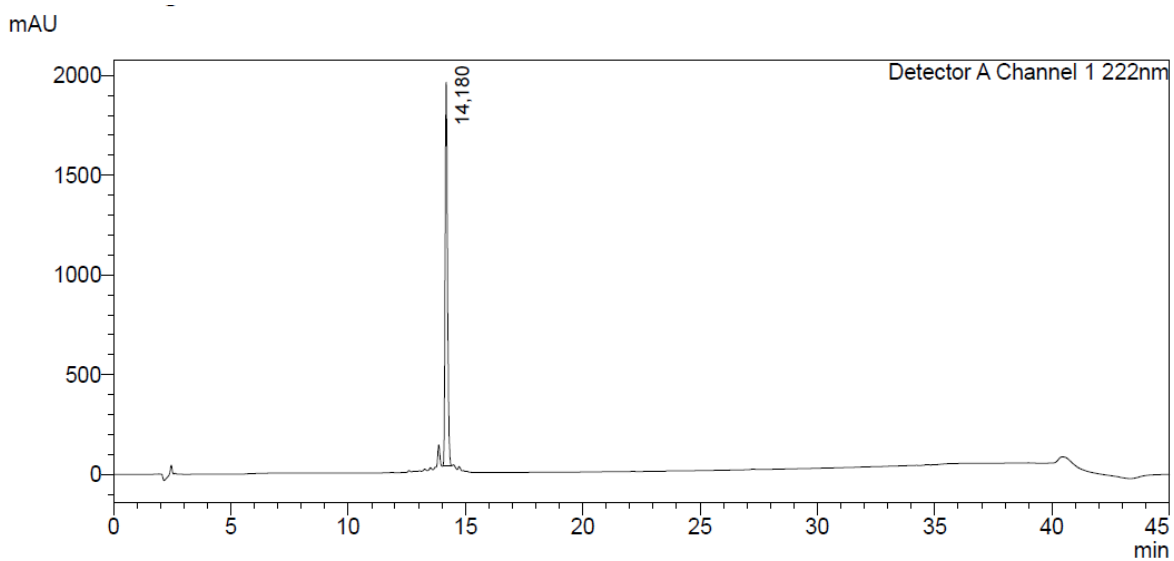

**Figure S60.** HPLC chromatogram of peptide **36**.

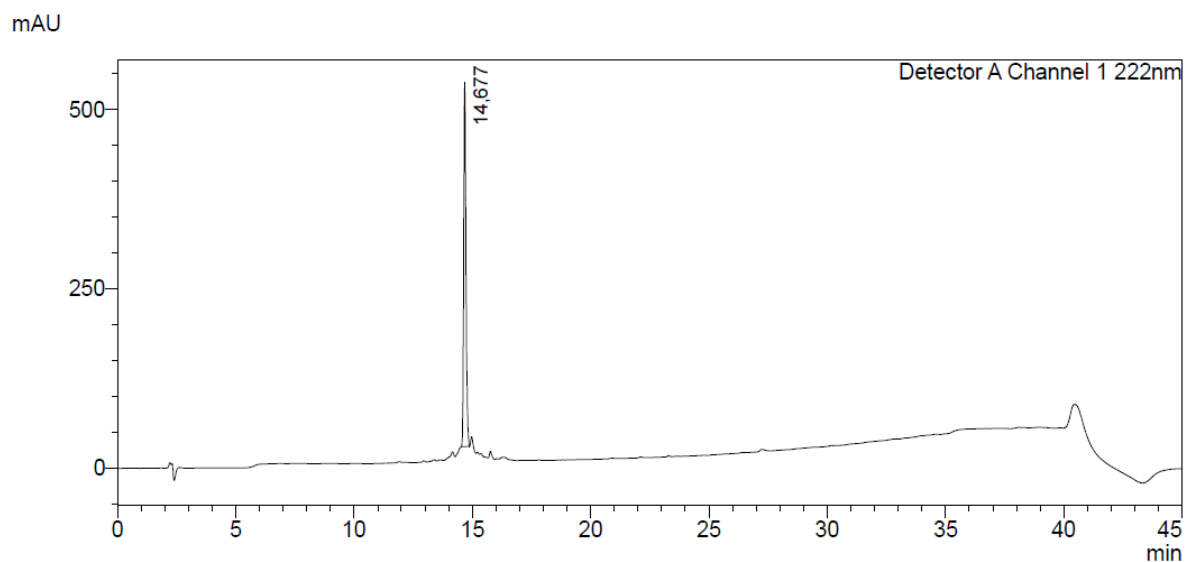

**Figure S61.** HPLC chromatogram of peptide **37**.

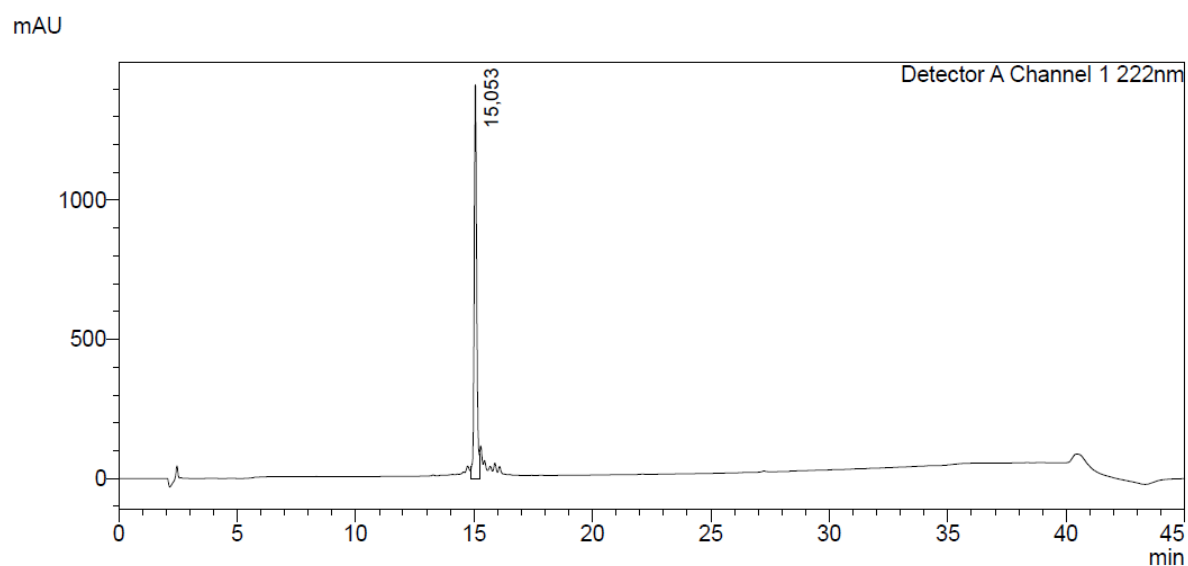

**Figure S62.** HPLC chromatogram of peptide **38**.

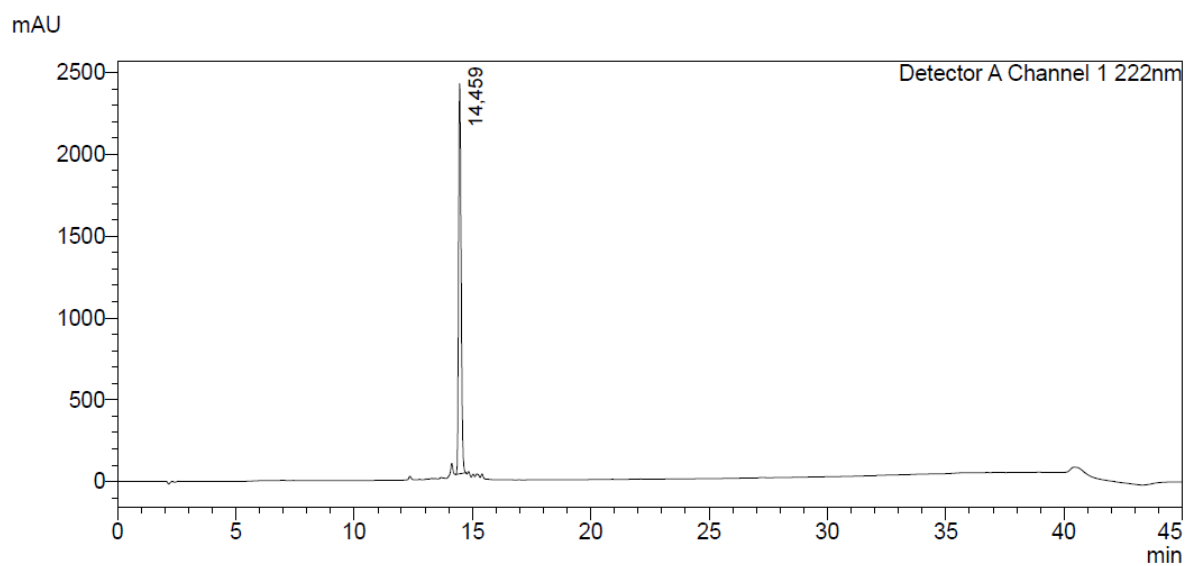

**Figure S63.** HPLC chromatogram of peptide **39**.

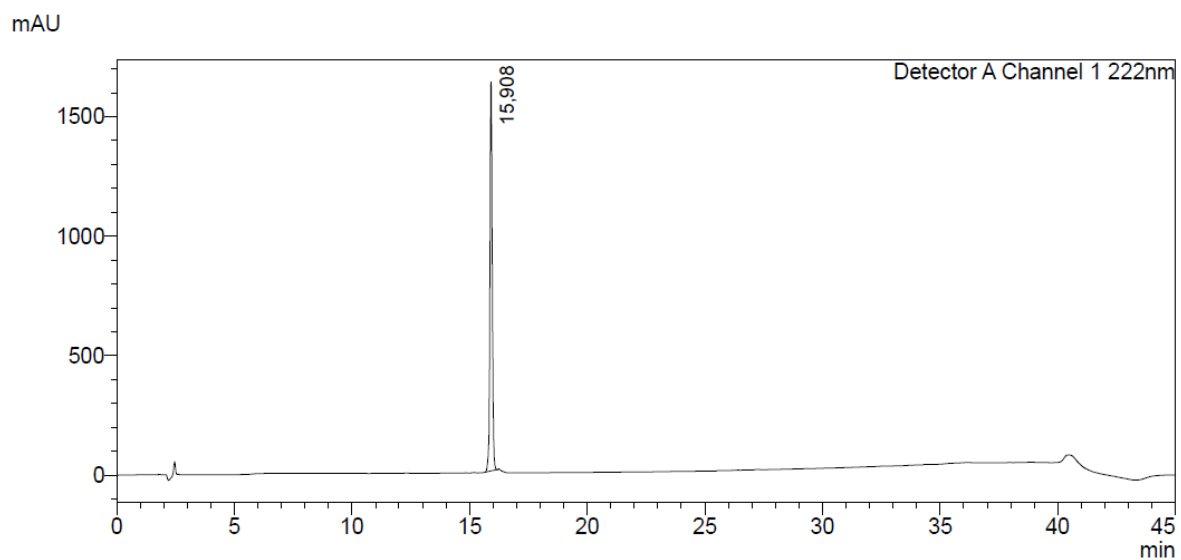

**Figure S64.** HPLC chromatogram of peptide **40**.

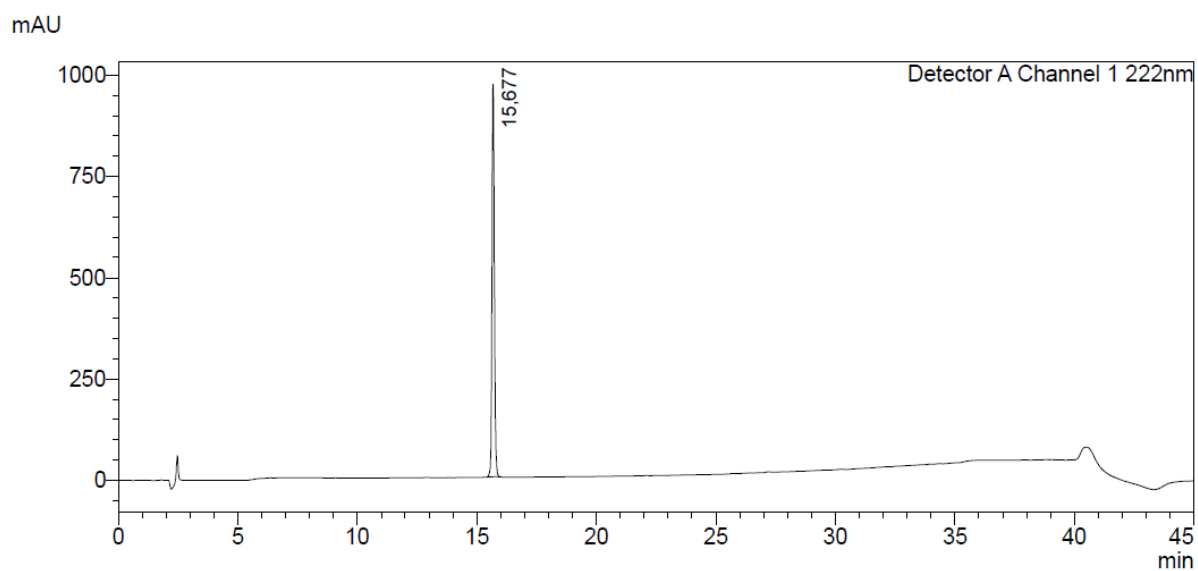

**Figure S65.** HPLC chromatogram of peptide **41**.

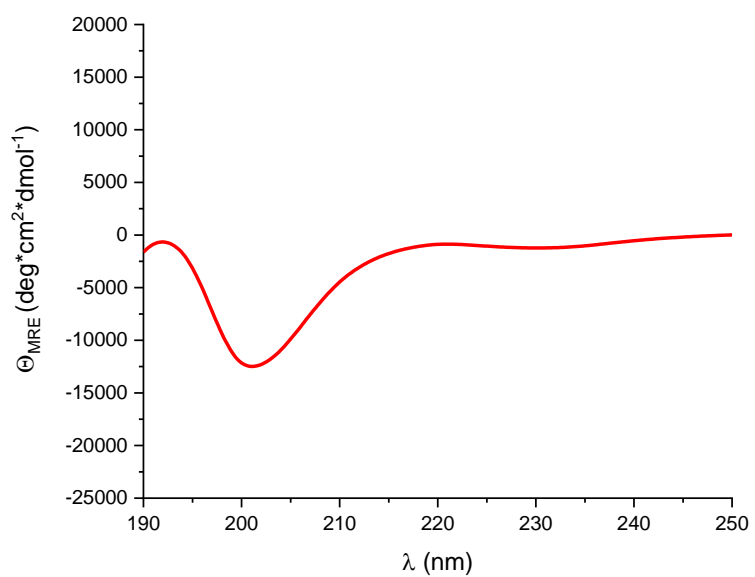

**Figure S66.** CD spectrum of peptide ACE $\alpha$ 1.

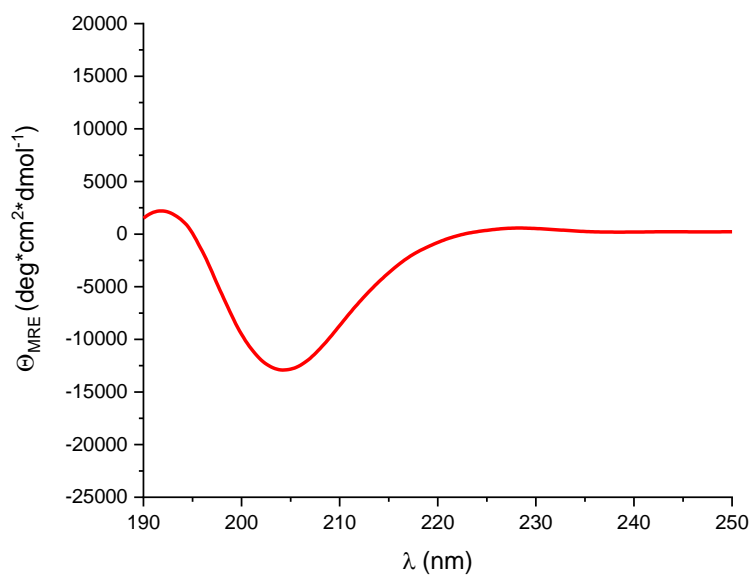

**Figure S67.** CD spectrum of peptide A1.

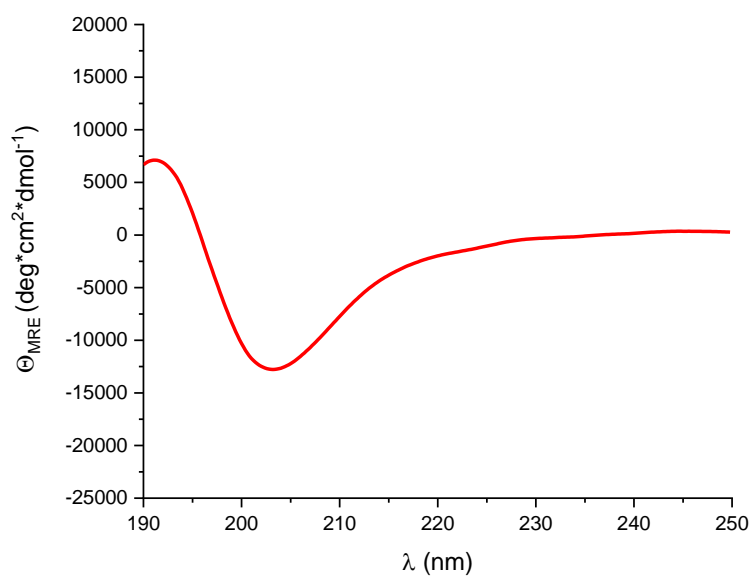

**Figure S68.** CD spectrum of peptide **A1a**.

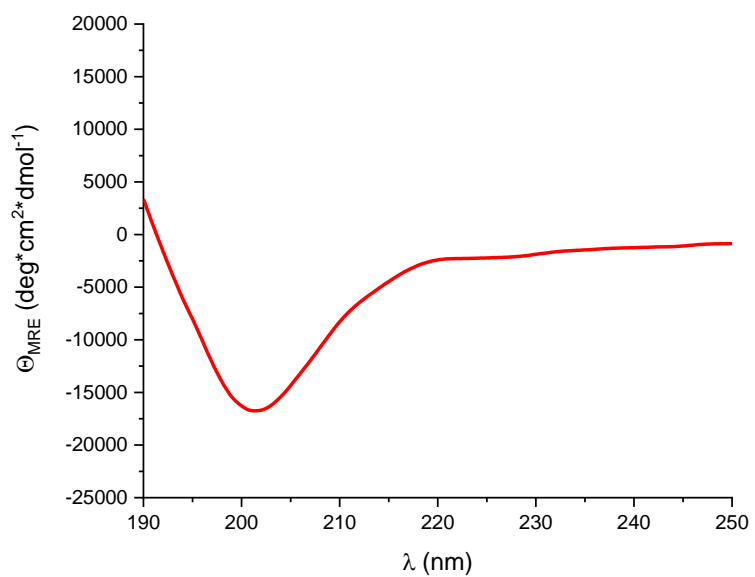

**Figure S69.** CD spectrum of peptide **A1b**.

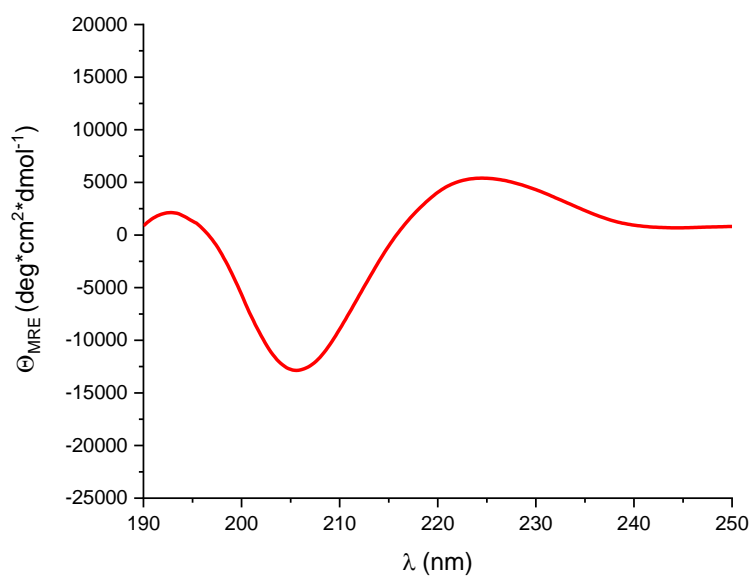

**Figure S70.** CD spectrum of peptide **A1c**.

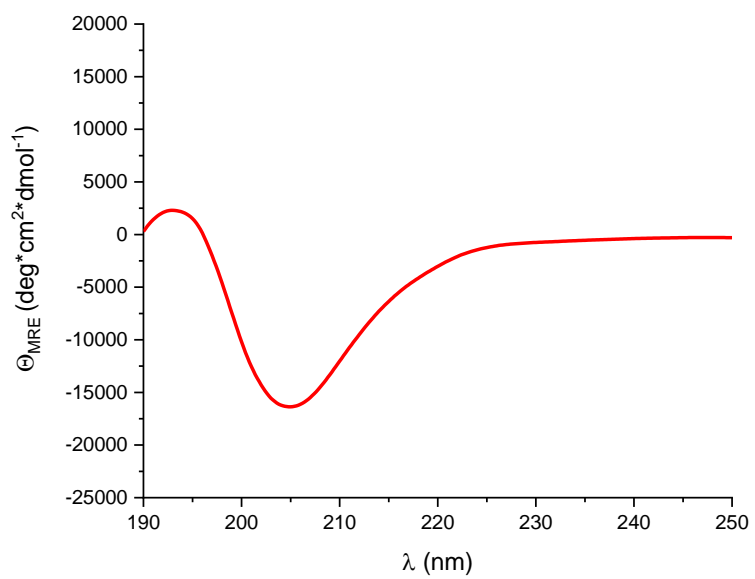

**Figure S71.** CD spectrum of peptide **A1v1**.



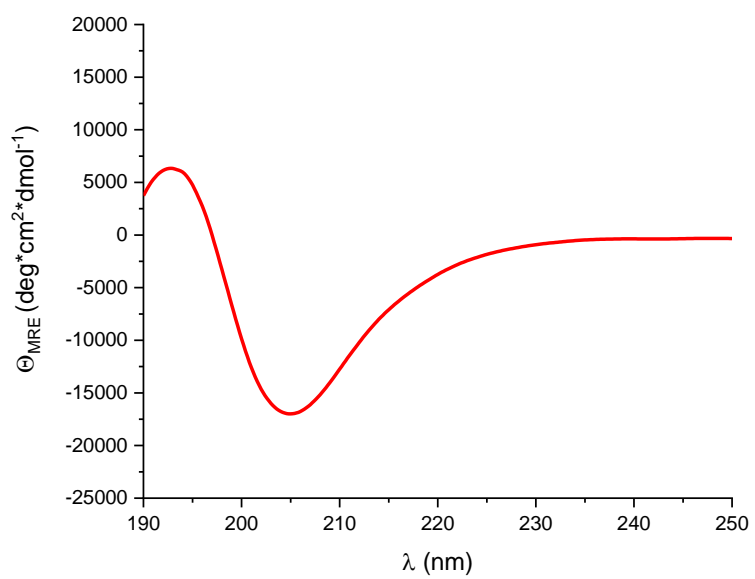

**Figure S72.** CD spectrum of peptide **A1v2**.

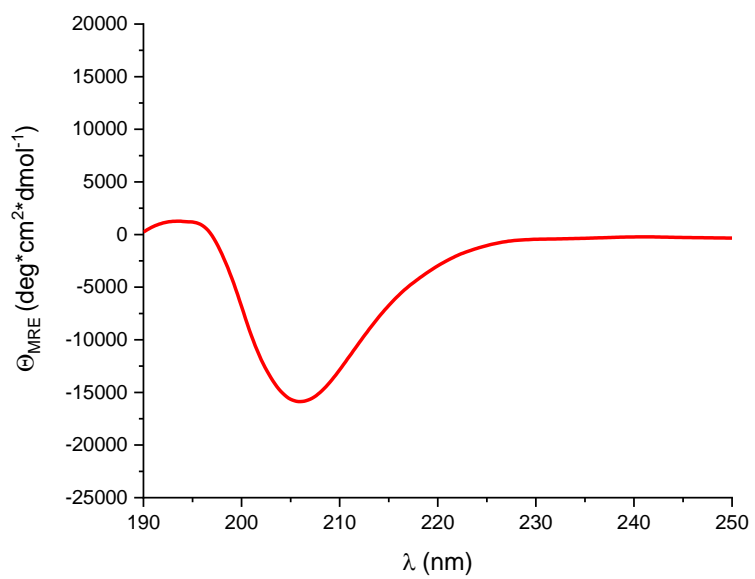

**Figure S73.** CD spectrum of peptide **A1v3**.

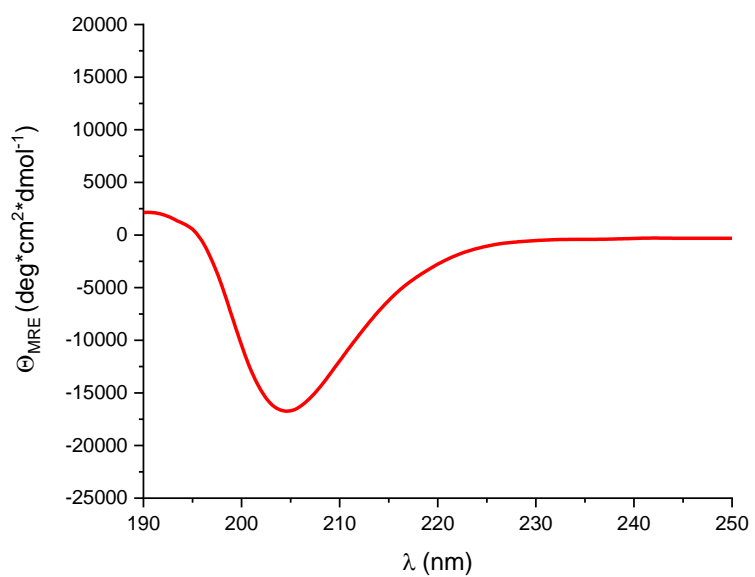

**Figure S74.** CD spectrum of peptide **A1v4**.

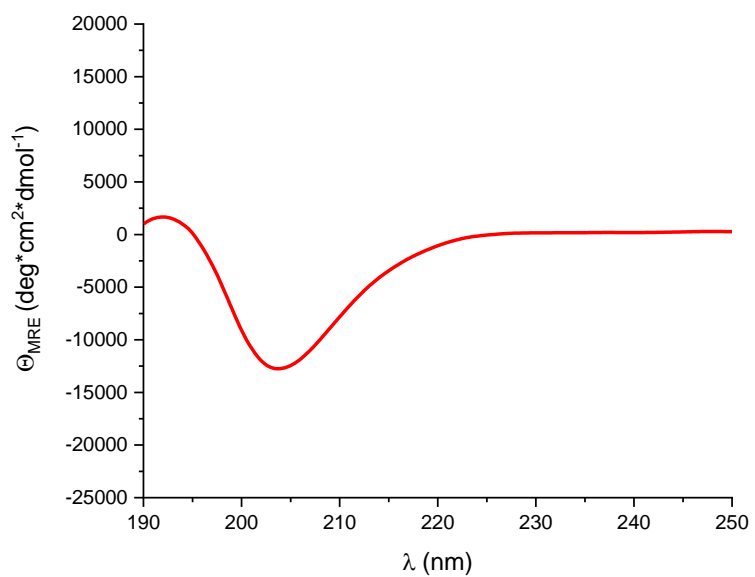

**Figure S75.** CD spectrum of peptide **A2**.

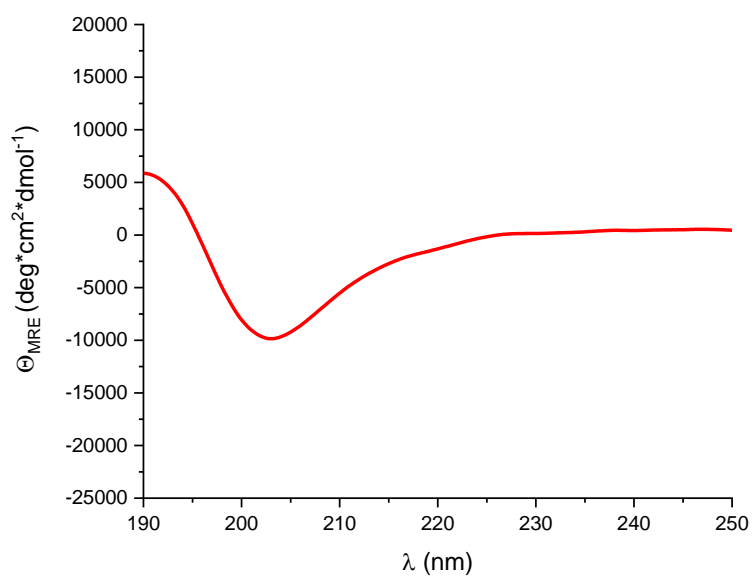

**Figure S76.** CD spectrum of peptide **A2a**.

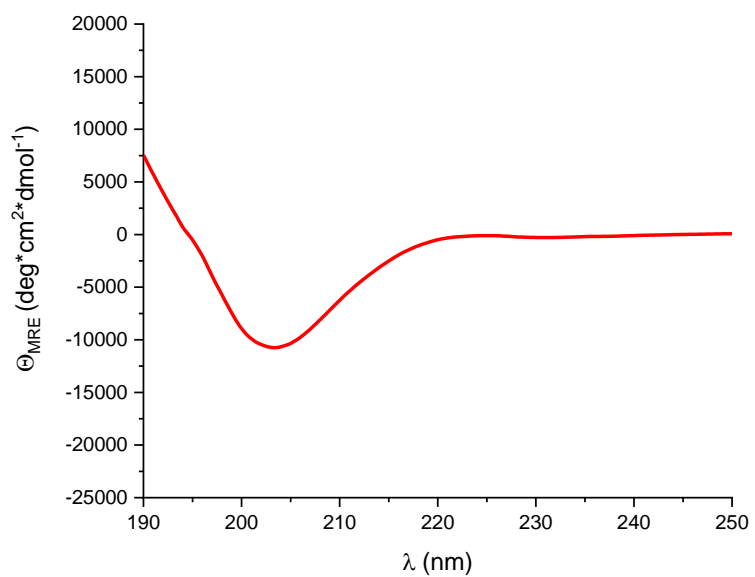

**Figure S77.** CD spectrum of peptide **A2b**.

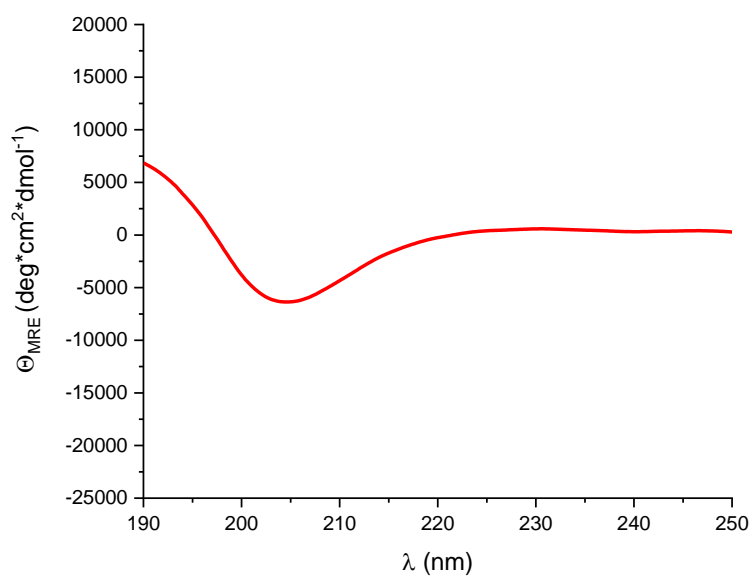

**Figure S78.** CD spectrum of peptide **A2c**.

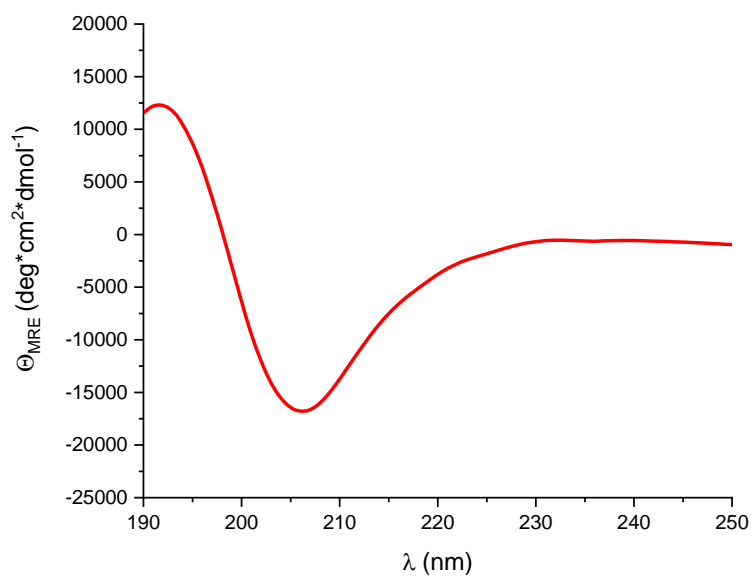

**Figure S79.** CD spectrum of peptide **A2v1**.

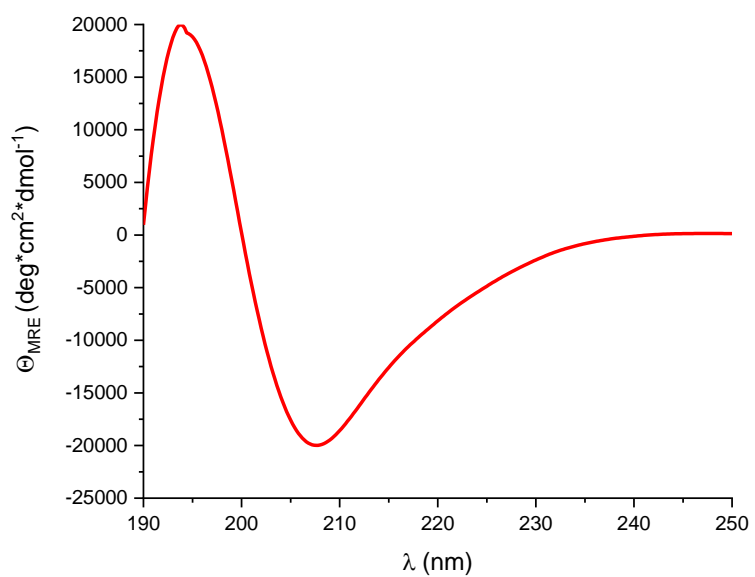

**Figure S80.** CD spectrum of peptide A2v2.

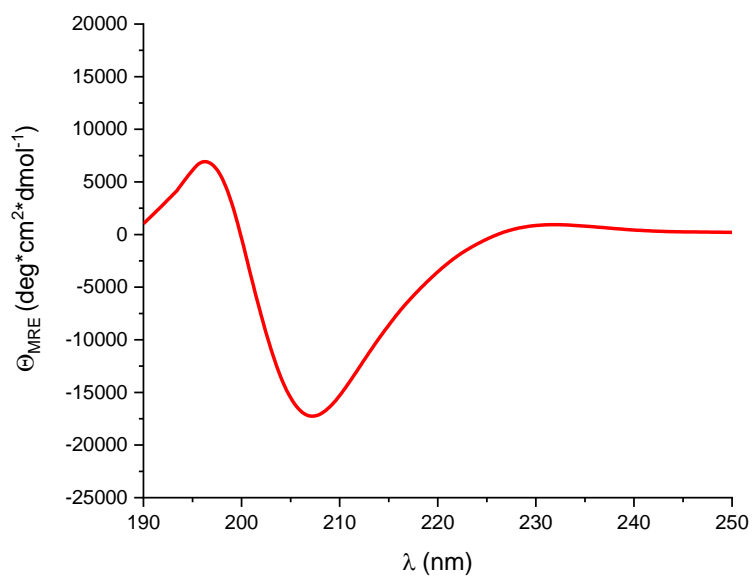

**Figure S81.** CD spectrum of peptide A2v3.

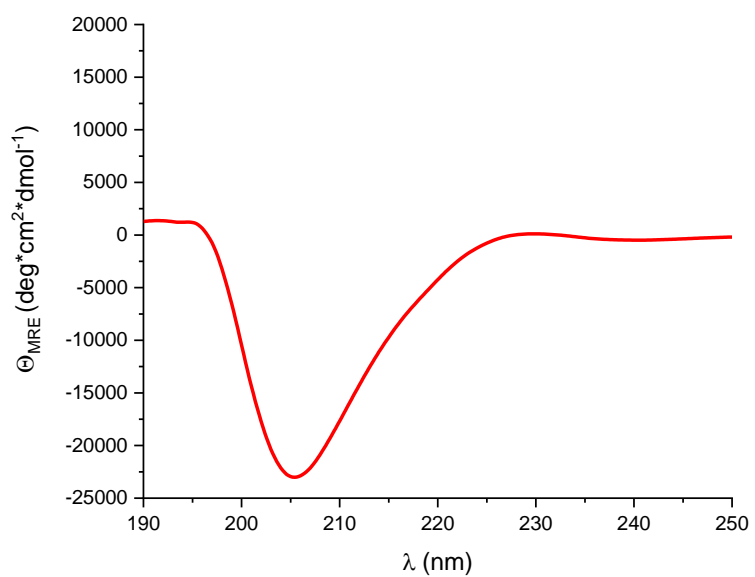

**Figure S82.** CD spectrum of peptide **A2v4**.

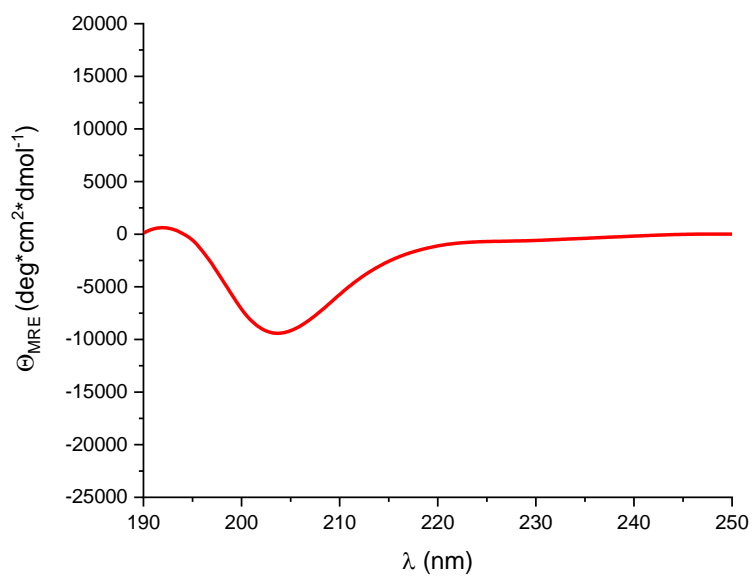

**Figure S83.** CD spectrum of peptide **A3**.

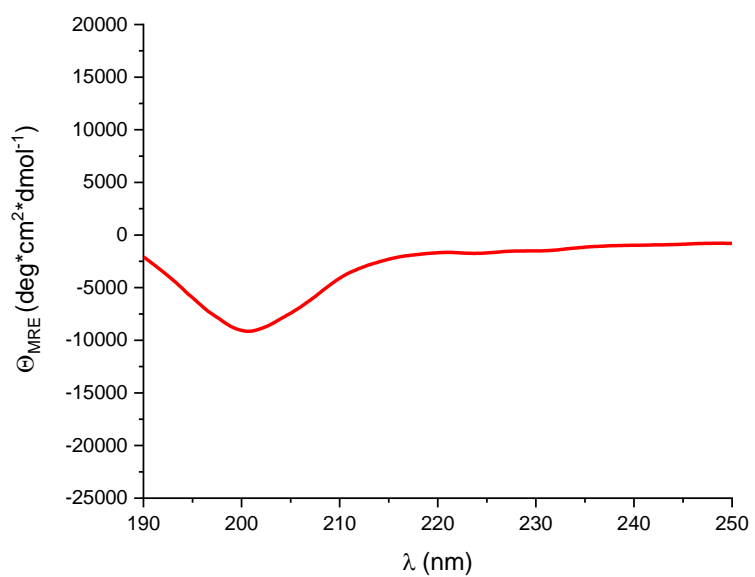

**Figure S84.** CD spectrum of peptide **A3a**.

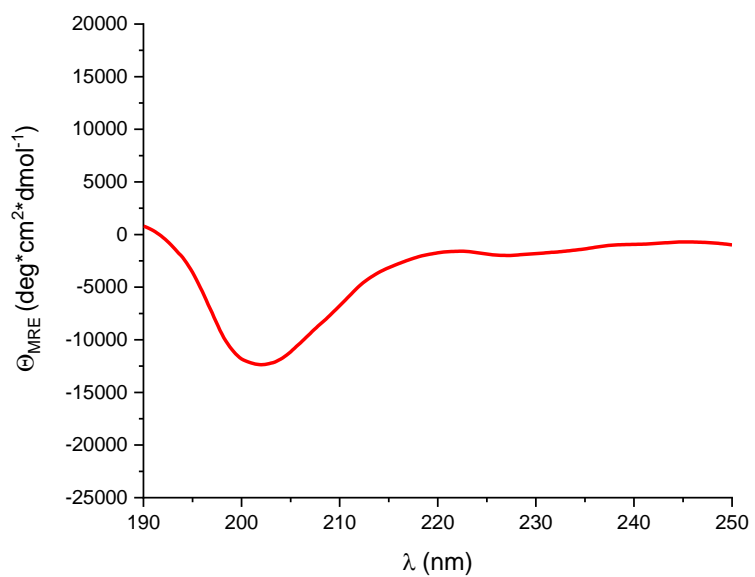

**Figure S85.** CD spectrum of peptide **A3b**.

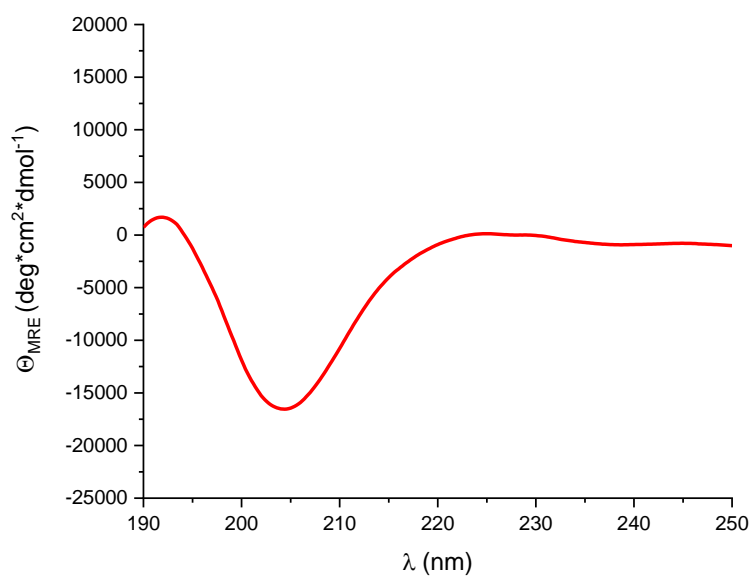

**Figure S86.** CD spectrum of peptide **A3c**.

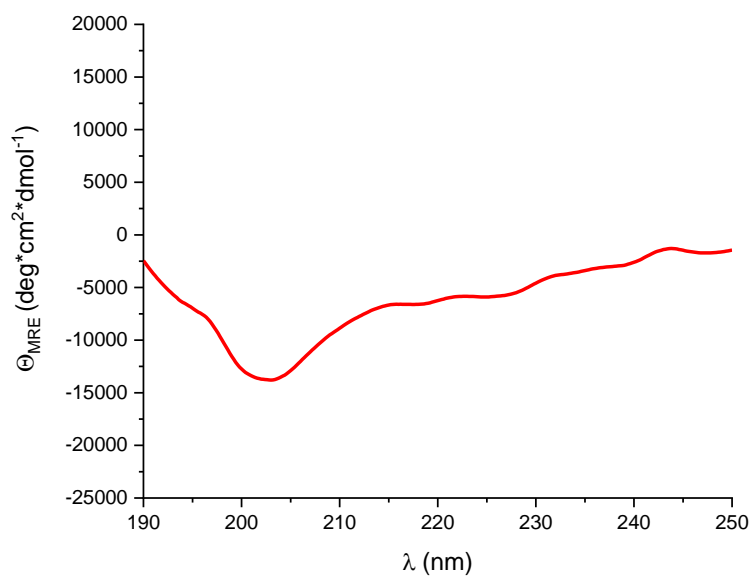

**Figure S87.** CD spectrum of peptide **1**.



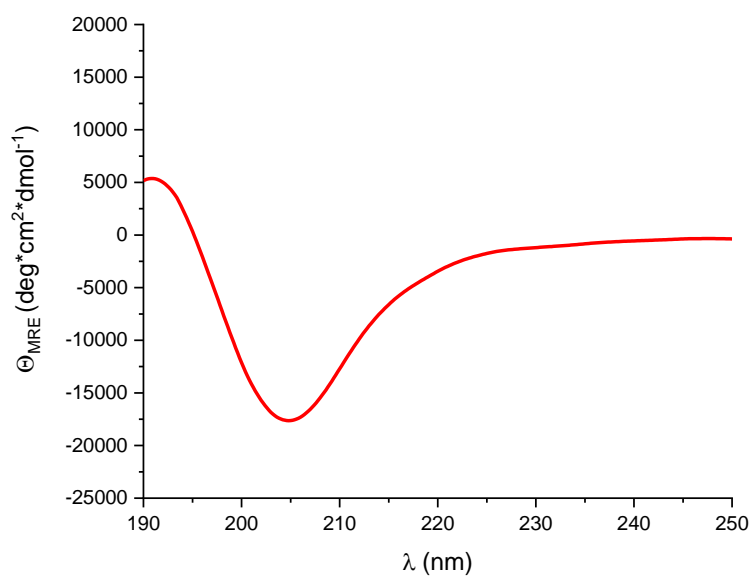

**Figure S88.** CD spectrum of peptide 2.

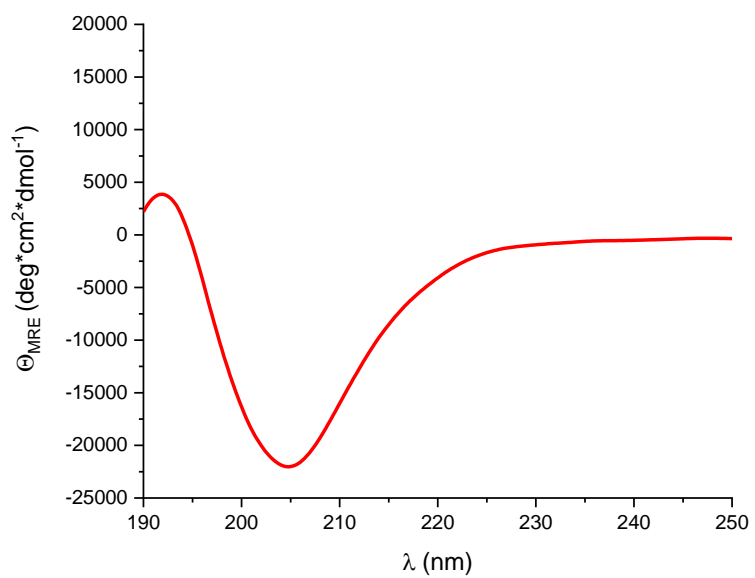

**Figure S89.** CD spectrum of peptide 3.

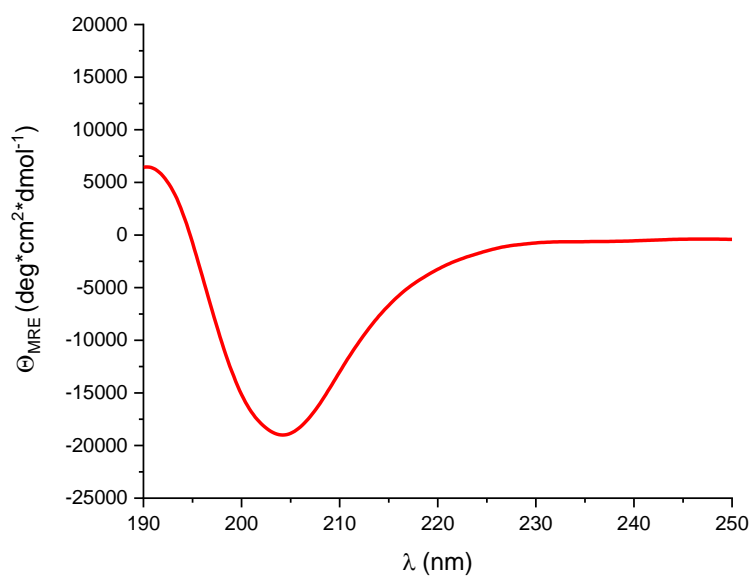

**Figure S90.** CD spectrum of peptide 4.

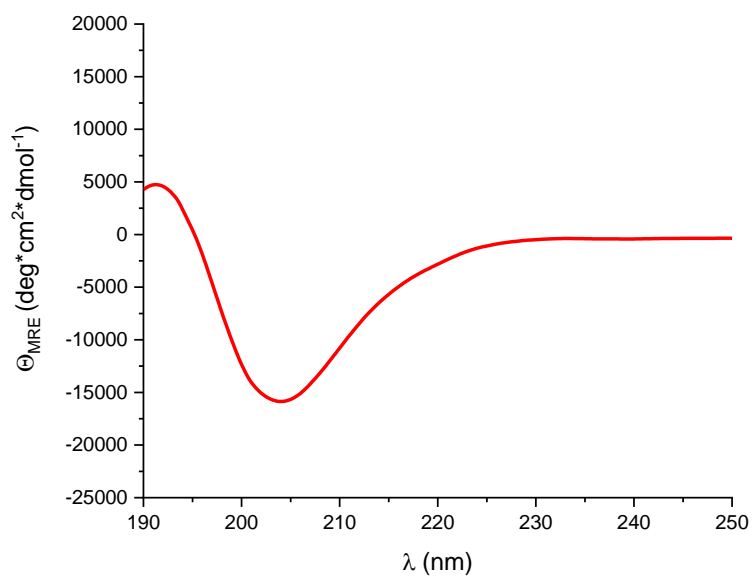

**Figure S91.** CD spectrum of peptide 5.

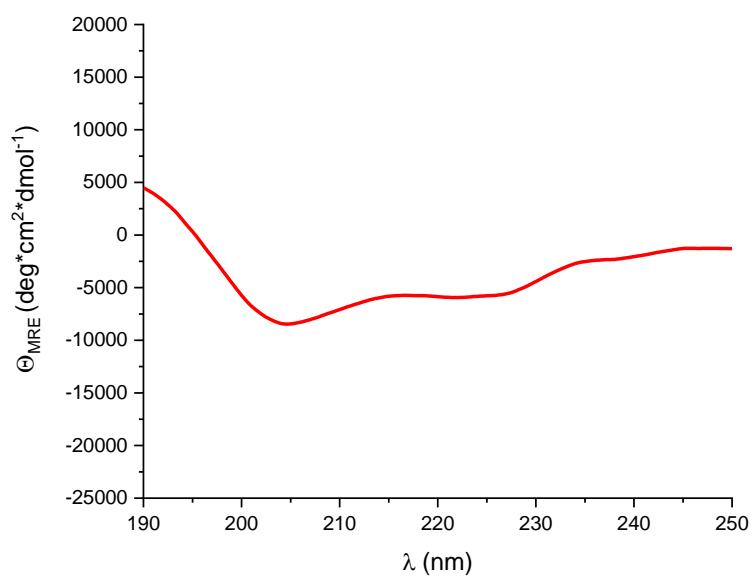

**Figure S92.** CD spectrum of peptide **6**.

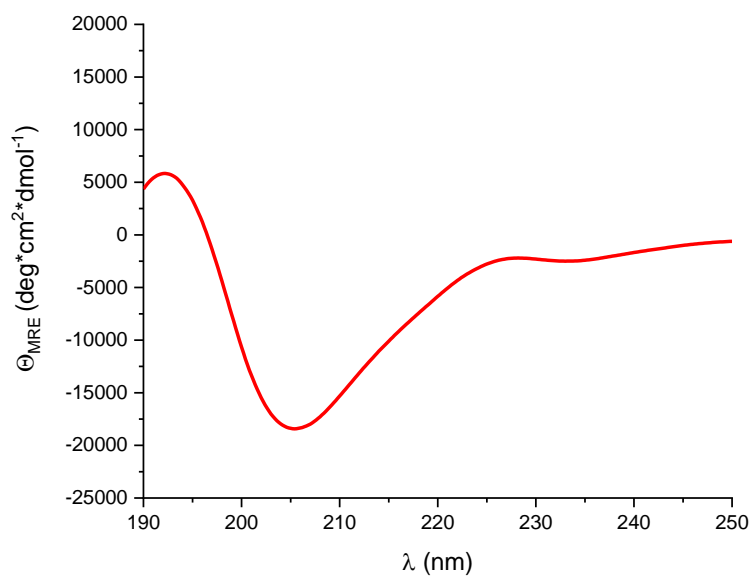

**Figure S93.** CD spectrum of peptide **7**.

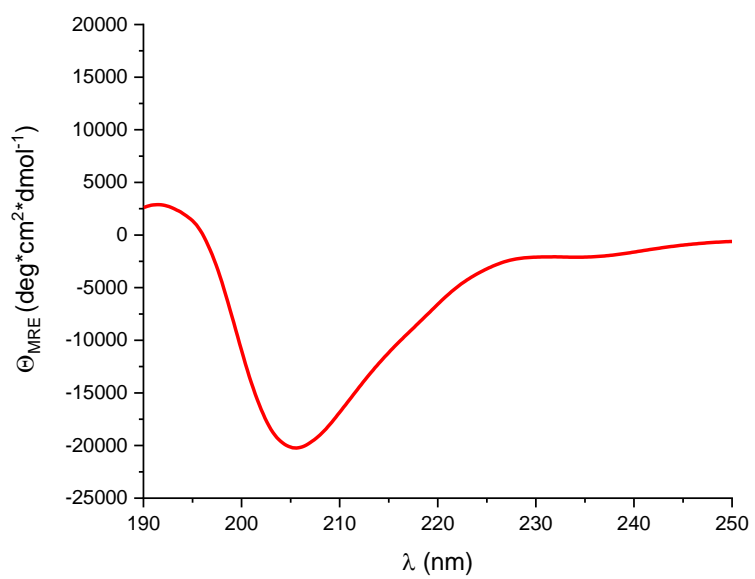

**Figure S94.** CD spectrum of peptide **8**.

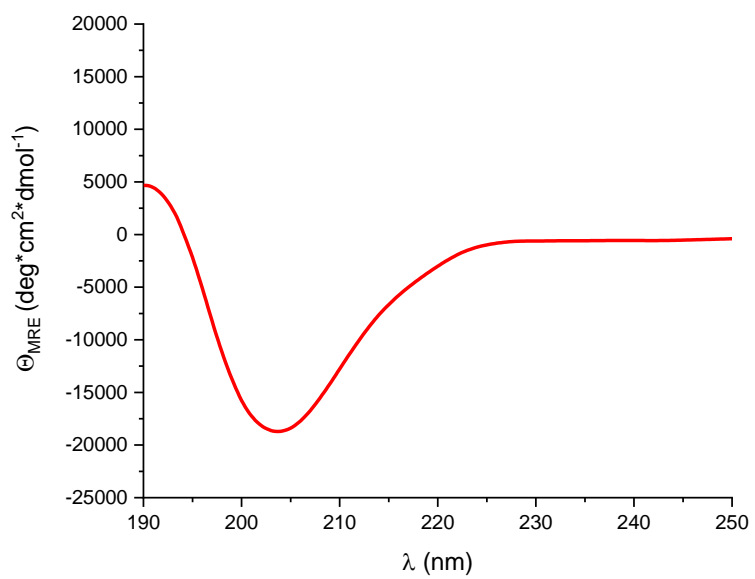

**Figure S95.** CD spectrum of peptide **9**.

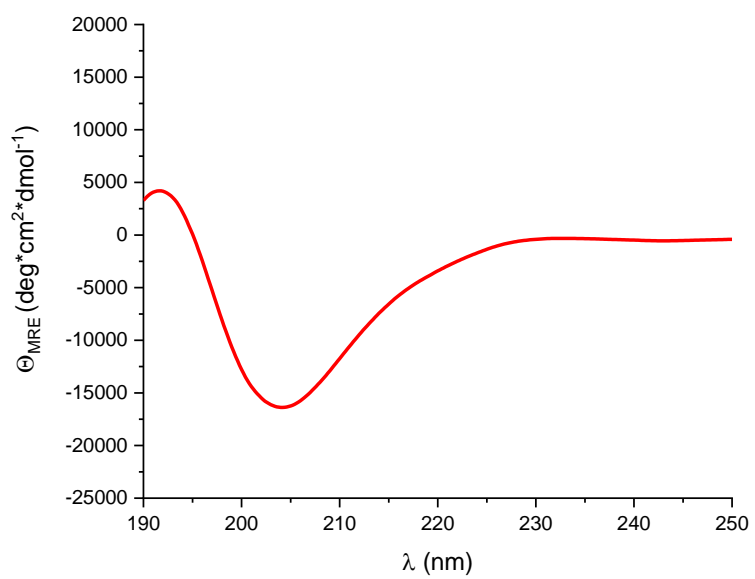

**Figure S96.** CD spectrum of peptide **10**.

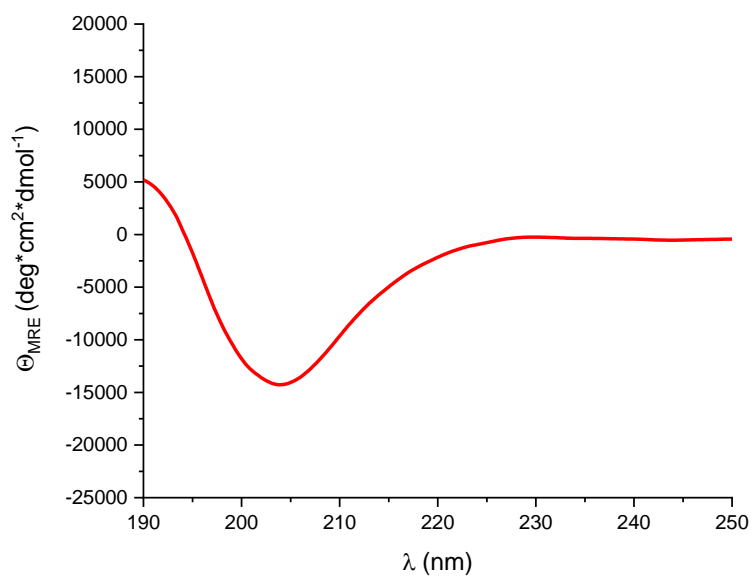

**Figure S97.** CD spectrum of peptide **11**.

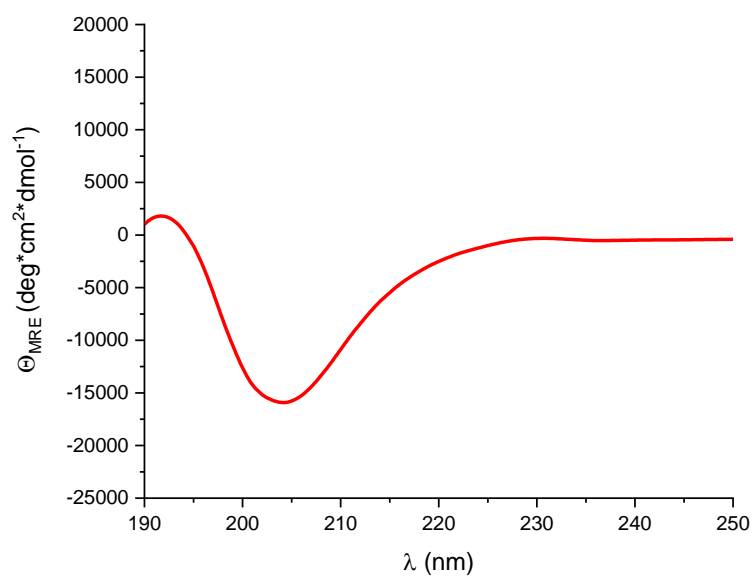

**Figure S98.** CD spectrum of peptide **12**.

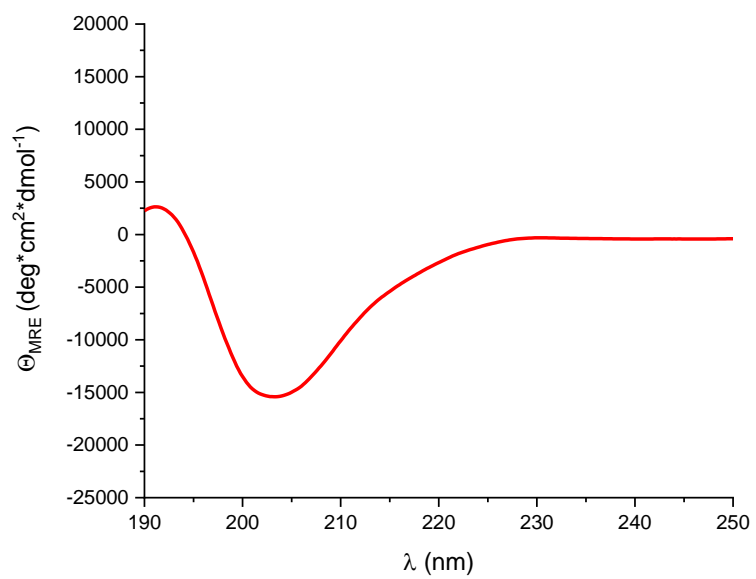

**Figure S99.** CD spectrum of peptide **13**.

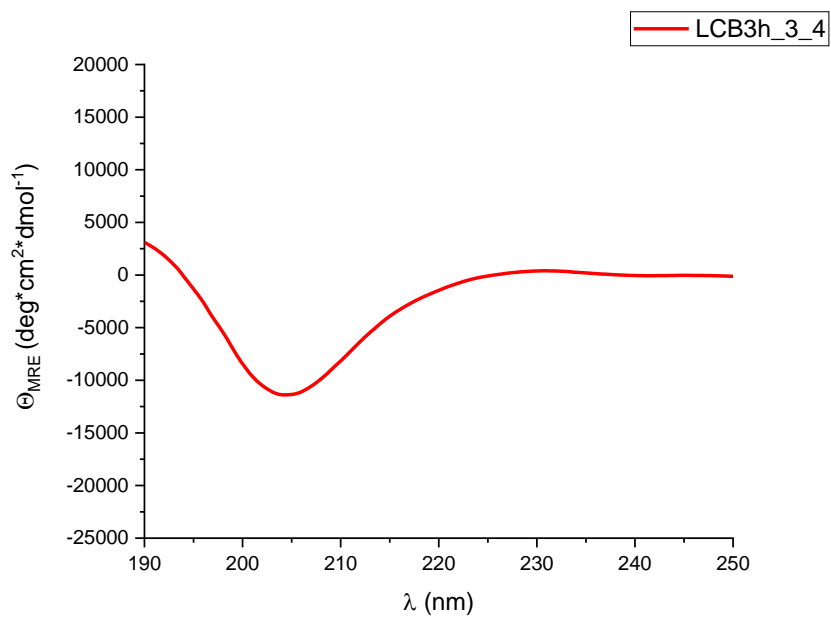

**Figure S100.** CD spectrum of peptide 14.

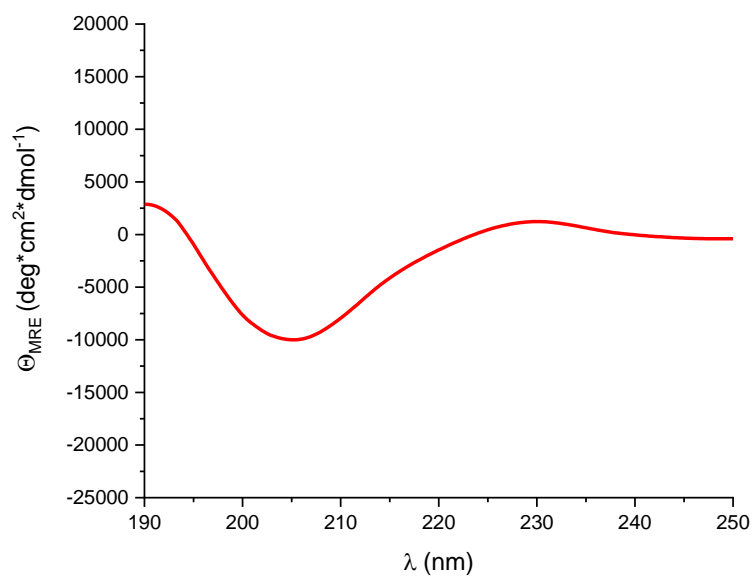

**Figure S101.** CD spectrum of peptide 15.

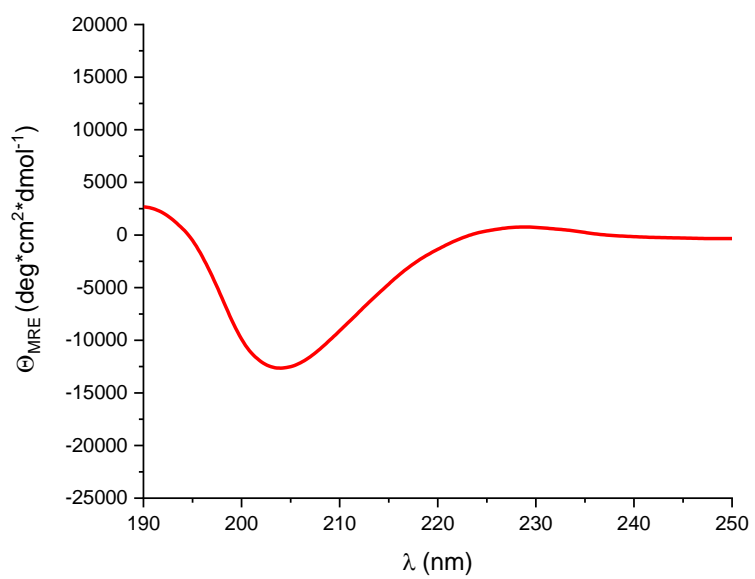

**Figure S102.** CD spectrum of peptide 16.

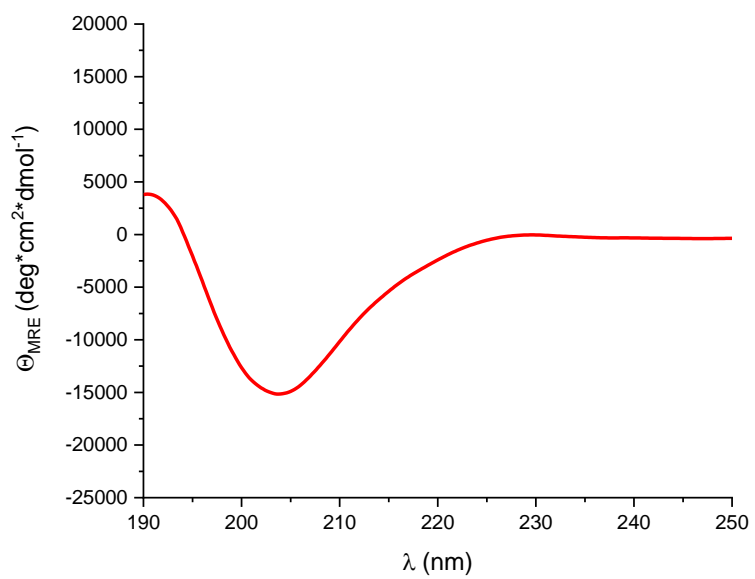

**Figure S103.** CD spectrum of peptide 17.



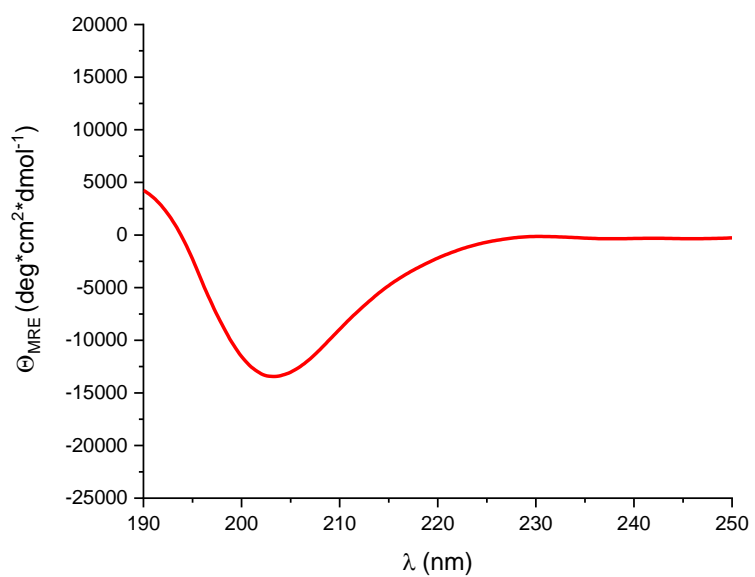

**Figure S104.** CD spectrum of peptide **18**.

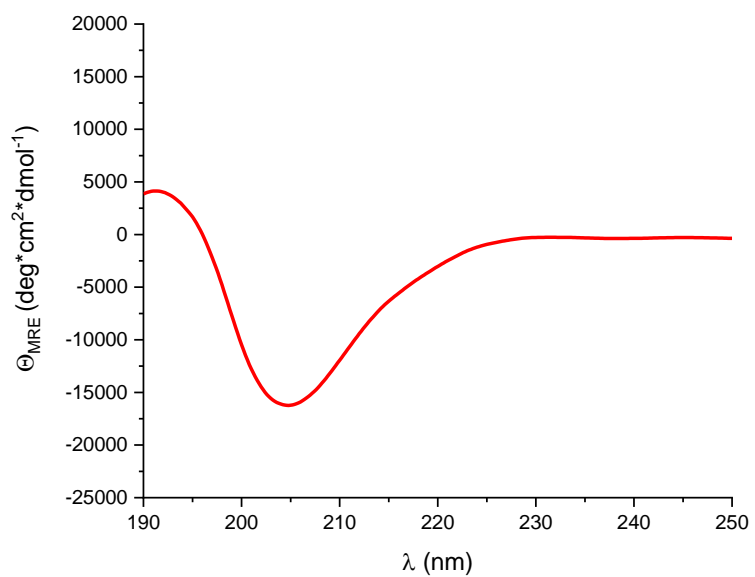

**Figure S105.** CD spectrum of peptide **19**.

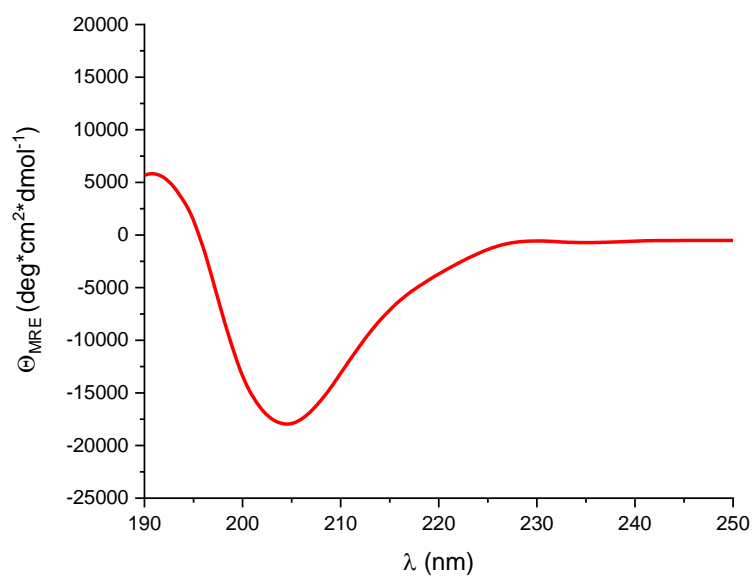

**Figure S106.** CD spectrum of peptide **20**.

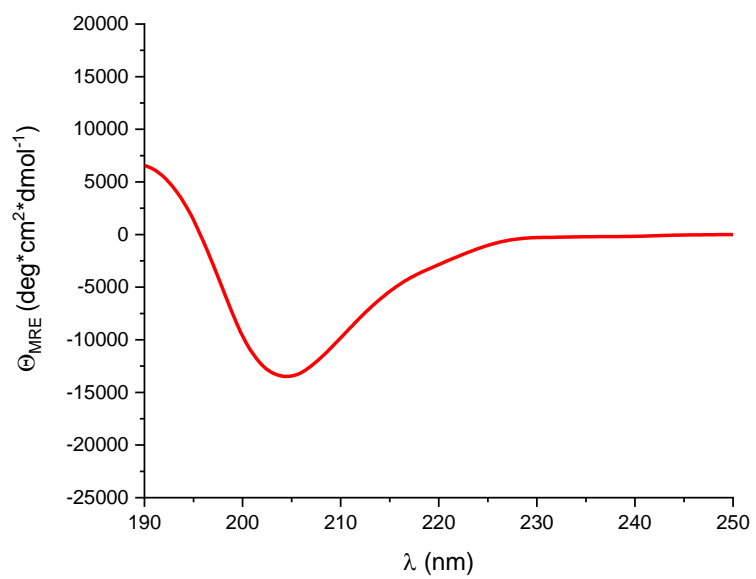

**Figure S107.** CD spectrum of peptide **21**.

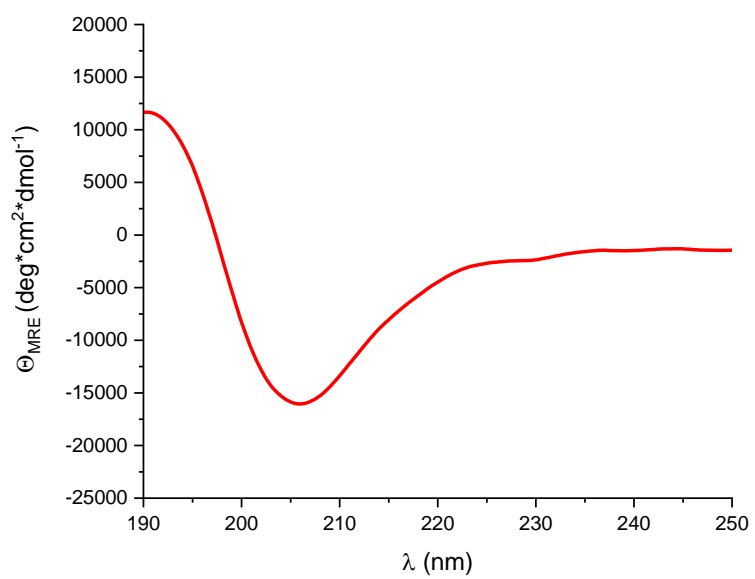

**Figure S108.** CD spectrum of peptide **22**.

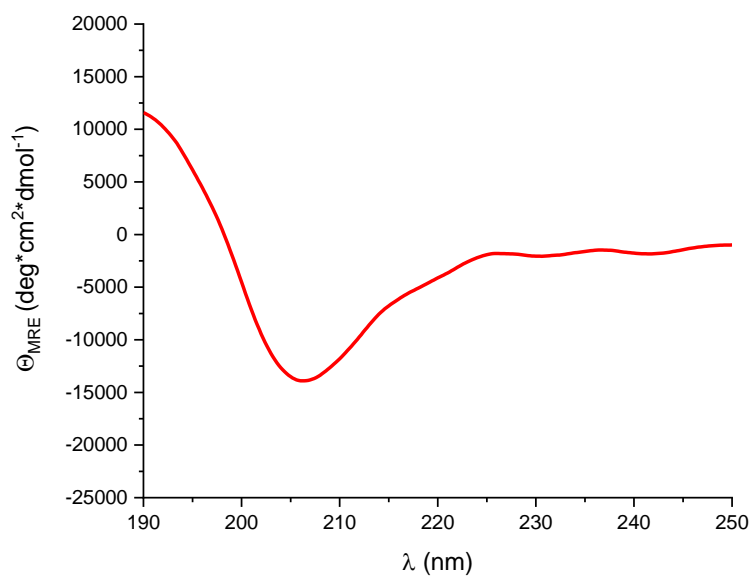

**Figure S109.** CD spectrum of peptide **23**.

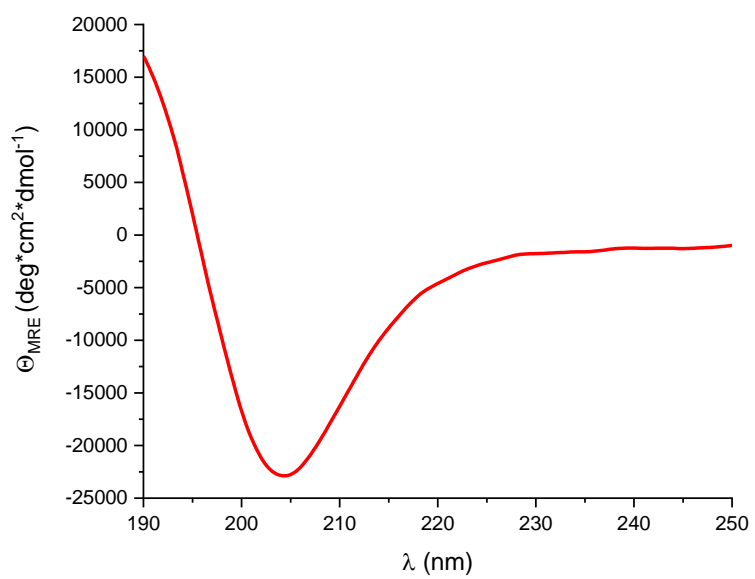

**Figure S110.** CD spectrum of peptide **24**.

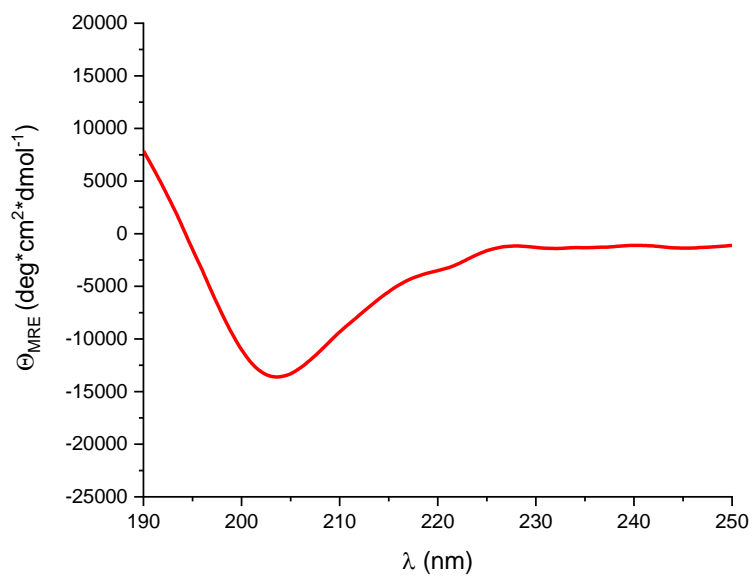

**Figure S111.** CD spectrum of peptide **25**.

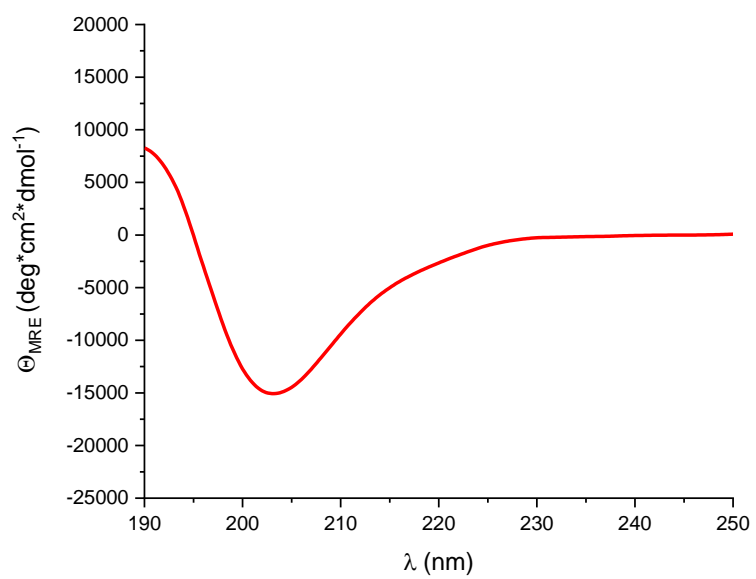

**Figure S112.** CD spectrum of peptide **26**.

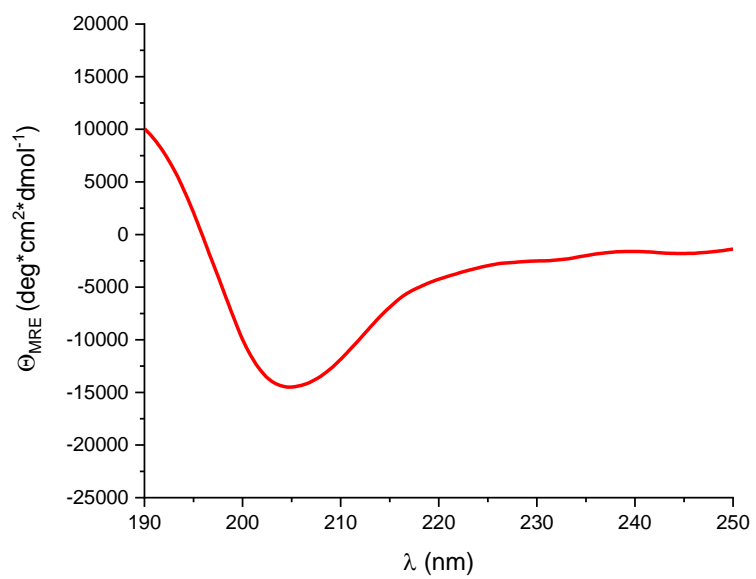

**Figure S113.** CD spectrum of peptide **27**.

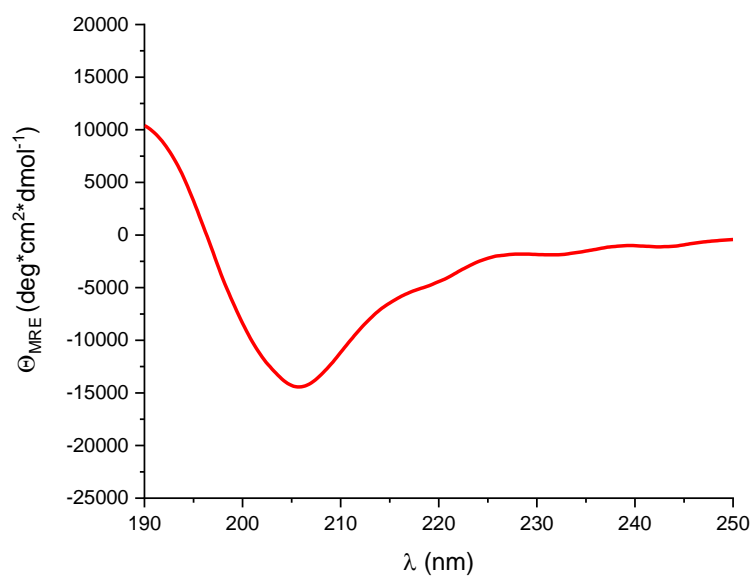

**Figure S114.** CD spectrum of peptide **28**.

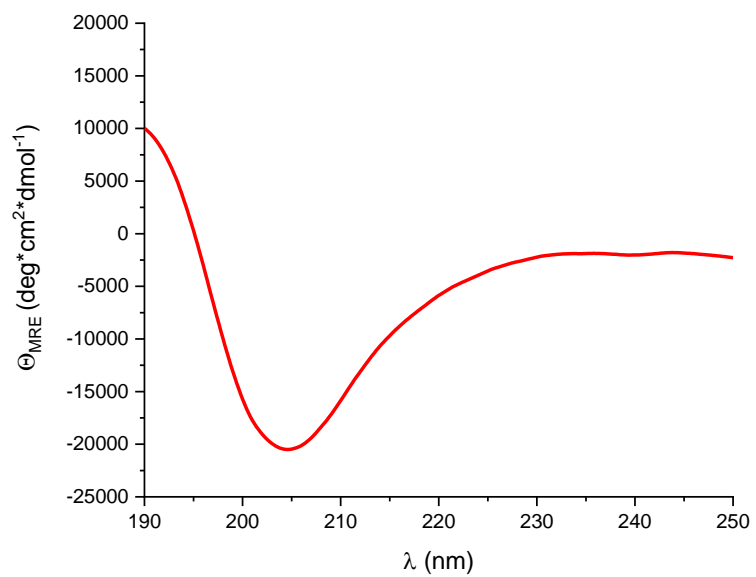

**Figure S115.** CD spectrum of peptide **29**.

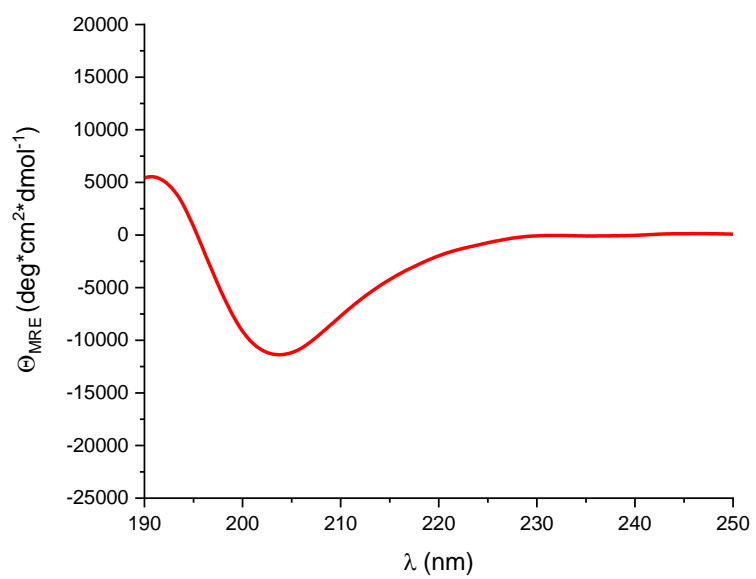

**Figure S116.** CD spectrum of peptide **30**.

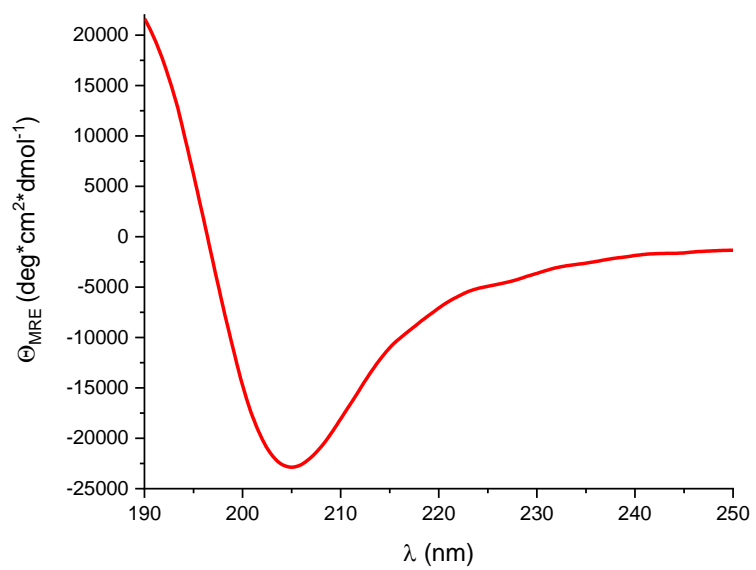

**Figure S117.** CD spectrum of peptide **31**.

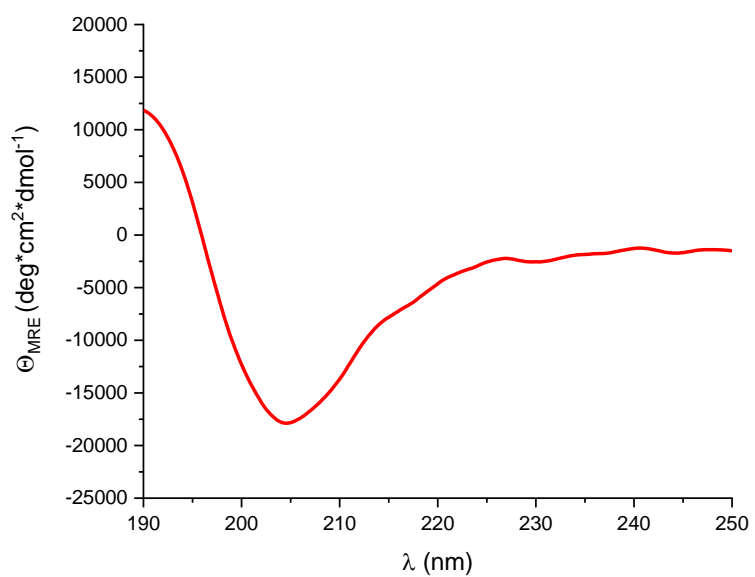

**Figure S118.** CD spectrum of peptide **32**.

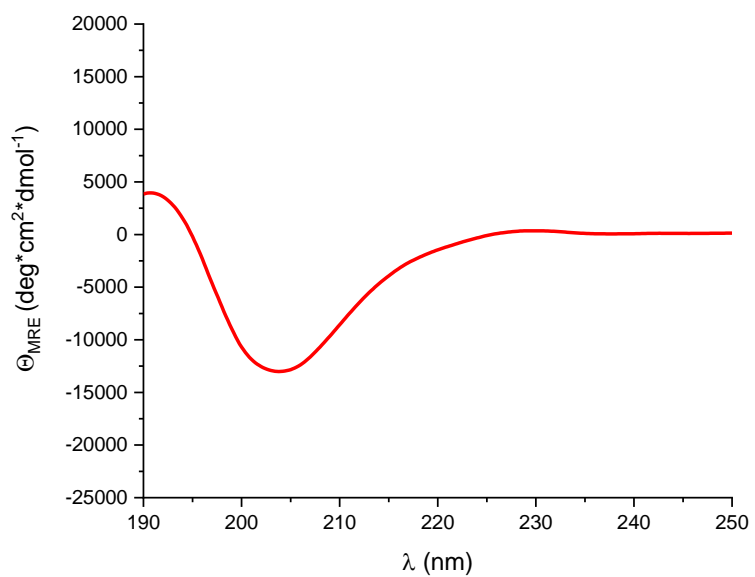

**Figure S119.** CD spectrum of peptide **33**.



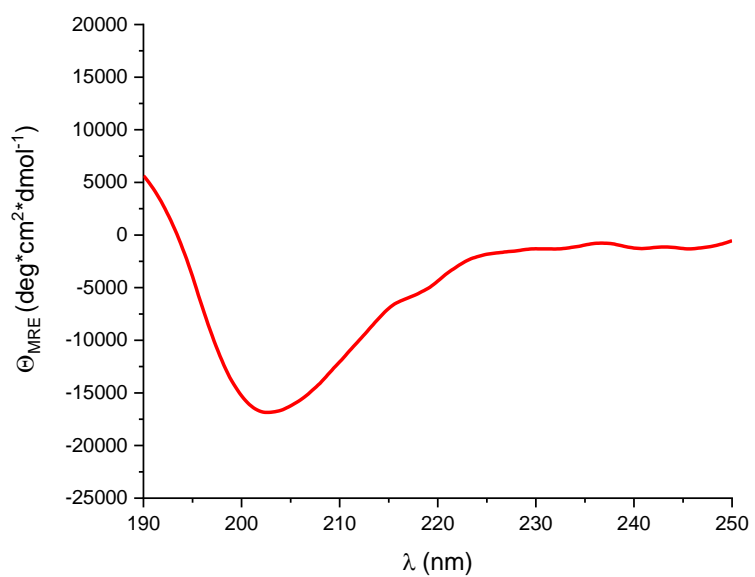

**Figure S120.** CD spectrum of peptide **34**.

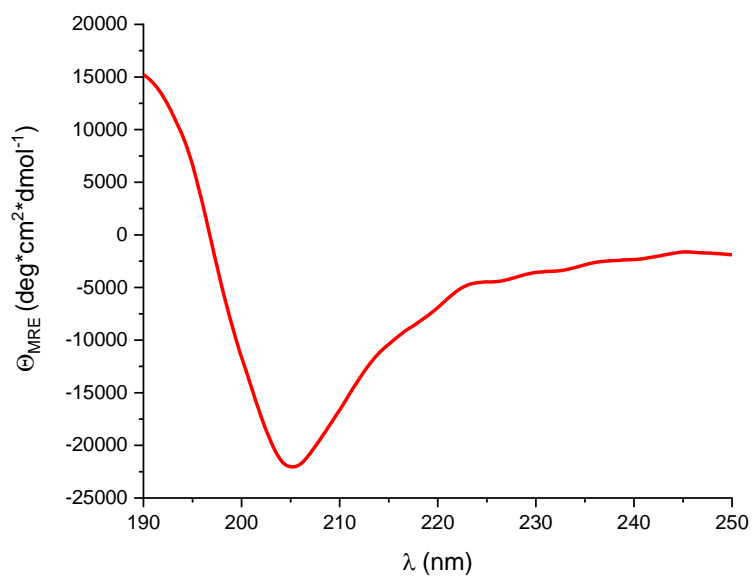

**Figure S121.** CD spectrum of peptide **35**.

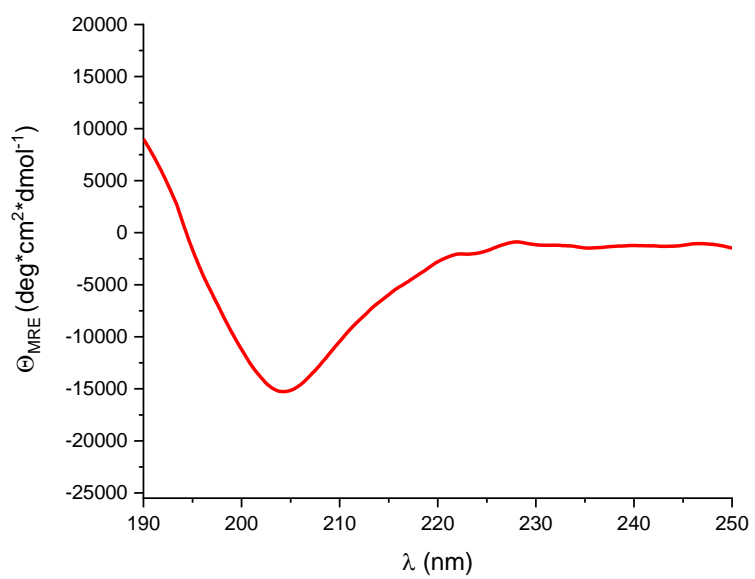

**Figure S122.** CD spectrum of peptide **36**.

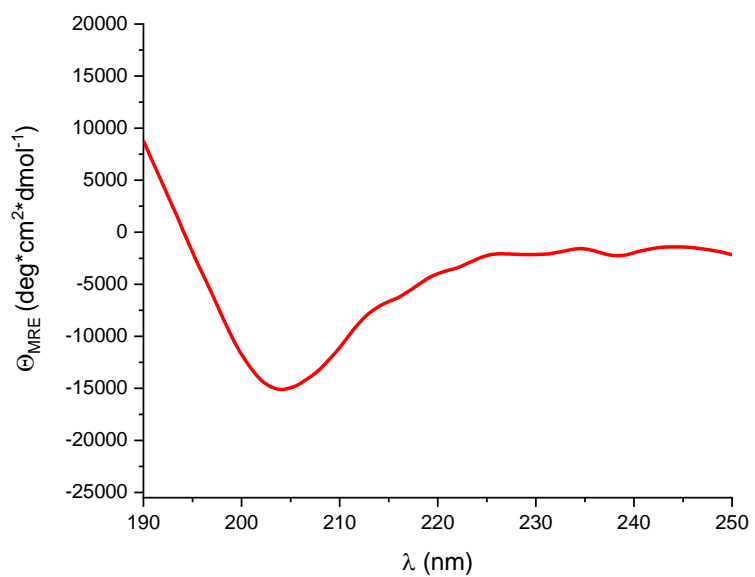

**Figure S123.** CD spectrum of peptide **37**.

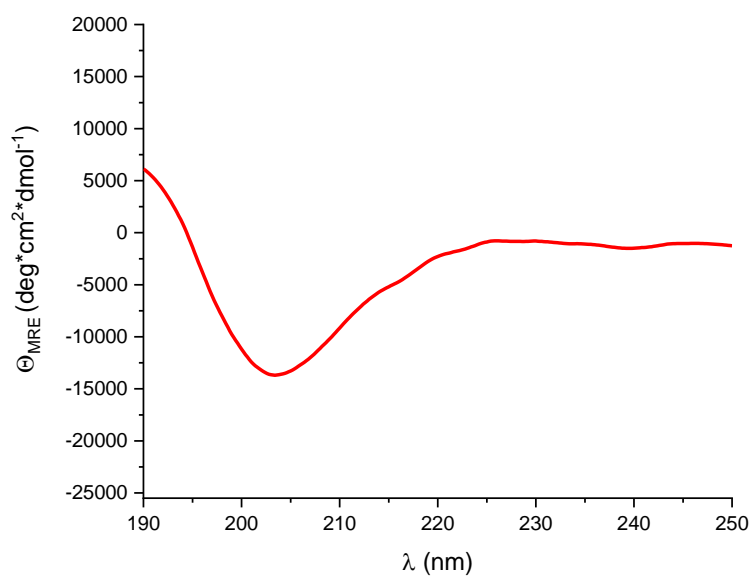

**Figure S124.** CD spectrum of peptide **38**.

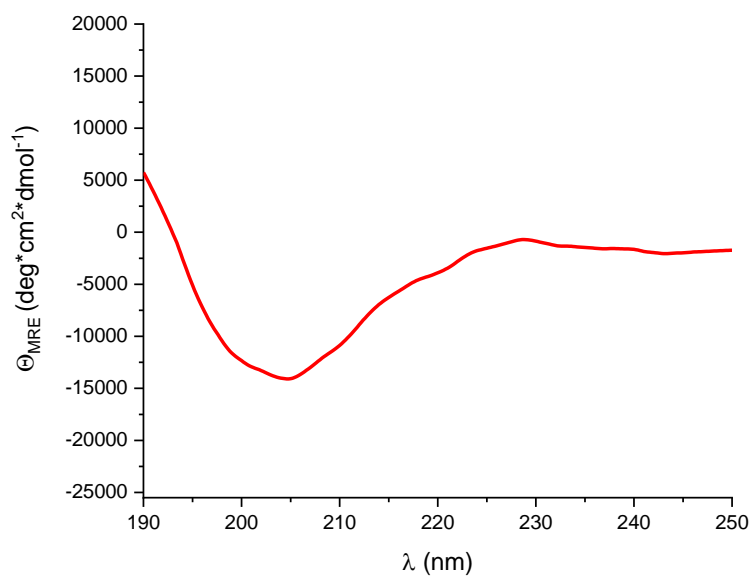

**Figure S125.** CD spectrum of peptide **39**.

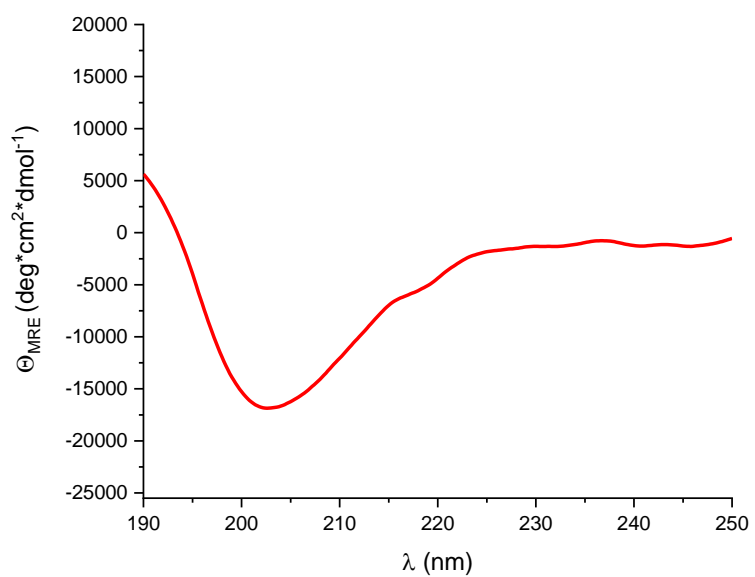

**Figure S126.** CD spectrum of peptide **40**.

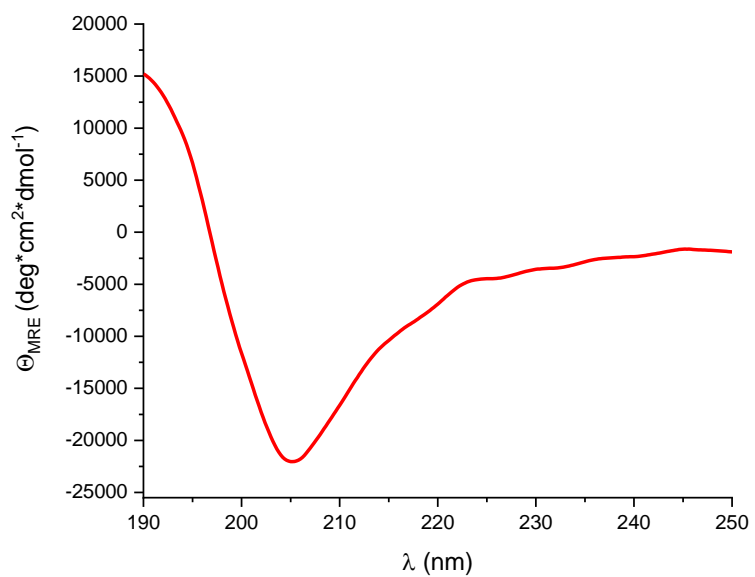

**Figure S127.** CD spectrum of peptide **41**.

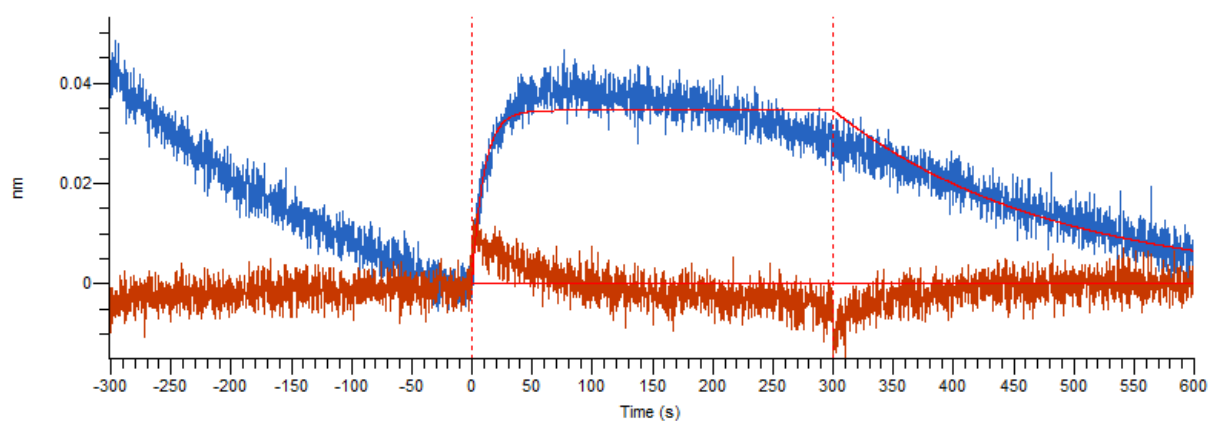

**Figure S128.** Binding of 50  $\mu\text{M}$  ACE $\alpha$ 1 to the RBD monitored with BLI.

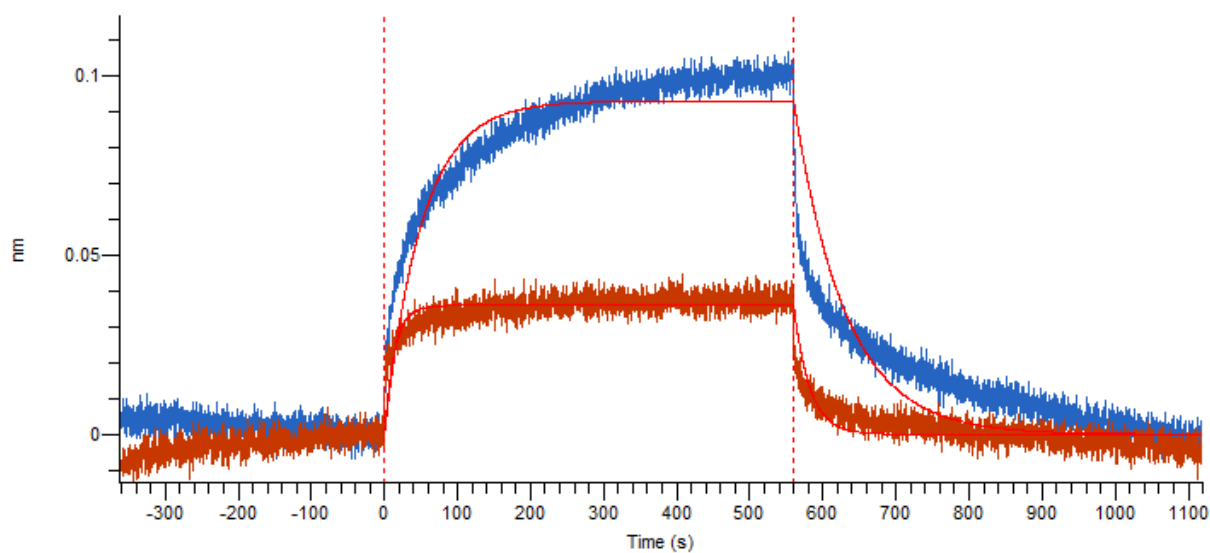

**Figure S129.** Binding of 50  $\mu\text{M}$  A1 to the RBD monitored with BLI.

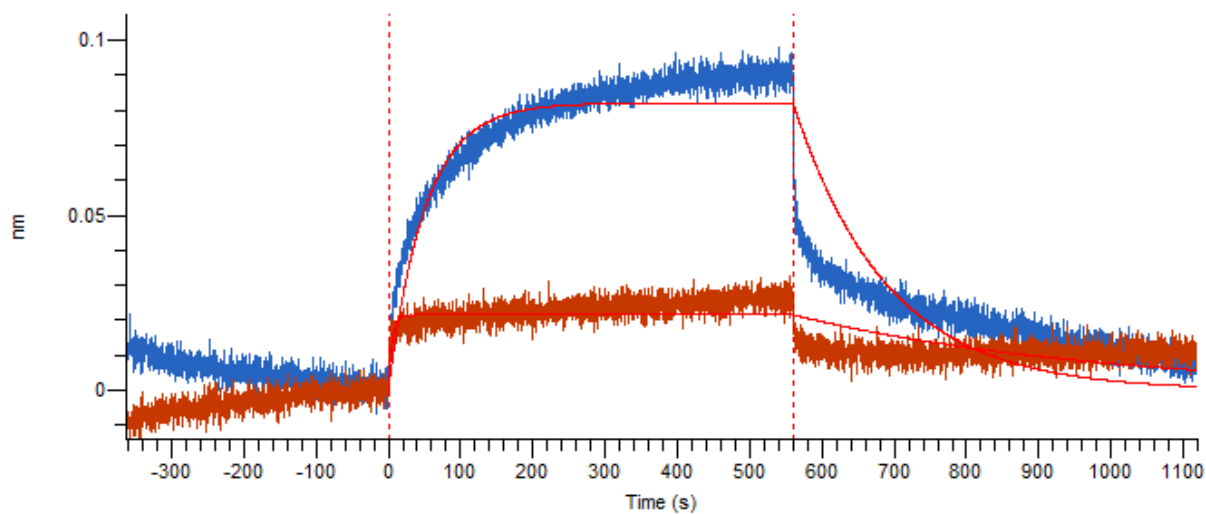

**Figure S130.** Binding of 50  $\mu\text{M}$  A1a to the RBD monitored with BLI.

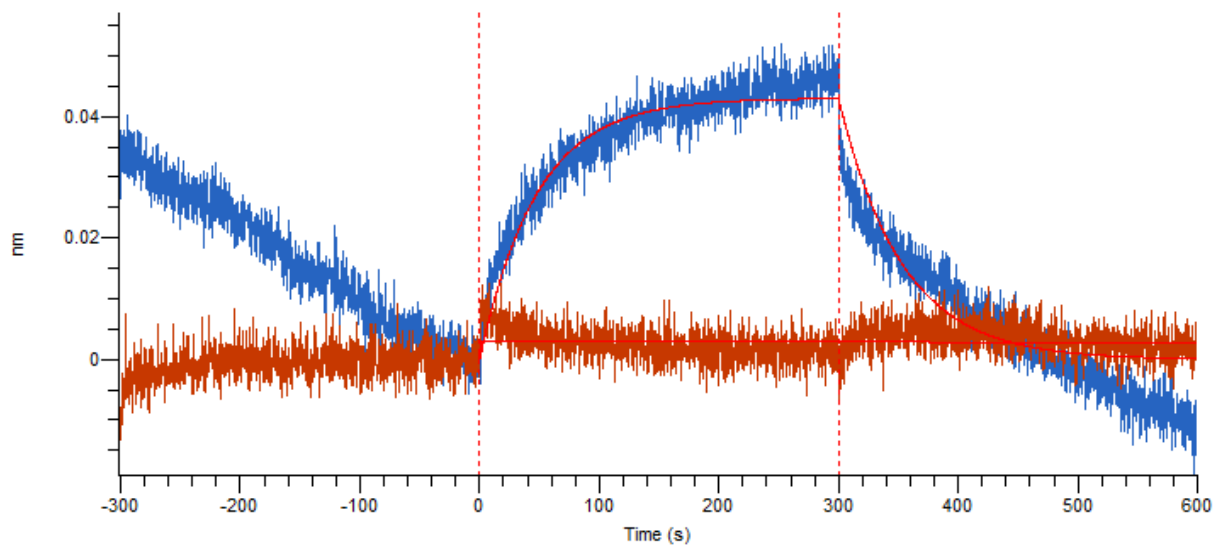

**Figure S131.** Binding of 50 μM A1b to the RBD monitored with BLI.

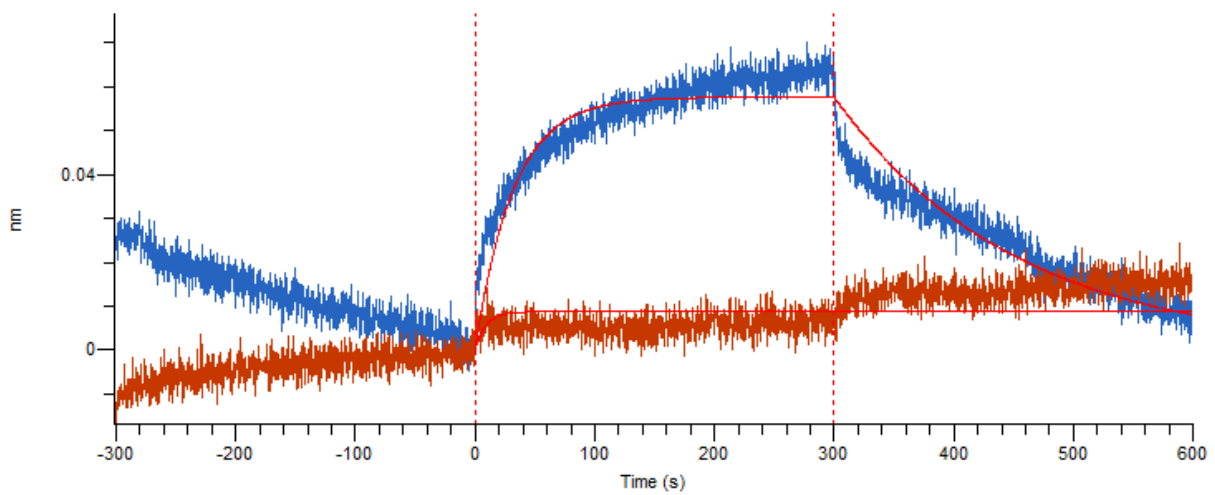

**Figure S132.** Binding of 50 μM A1c to the RBD monitored with BLI.

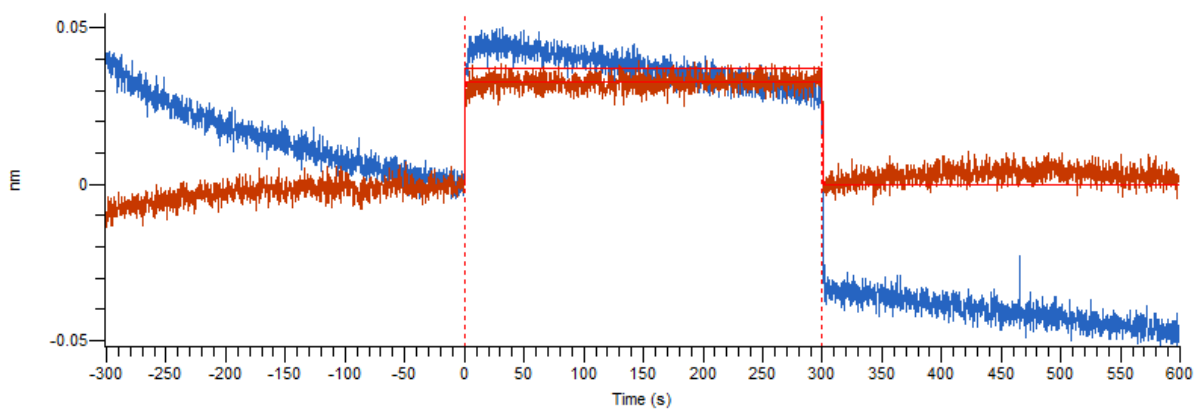

**Figure S133.** Binding of 50 μM A1v1 to the RBD monitored with BLI.

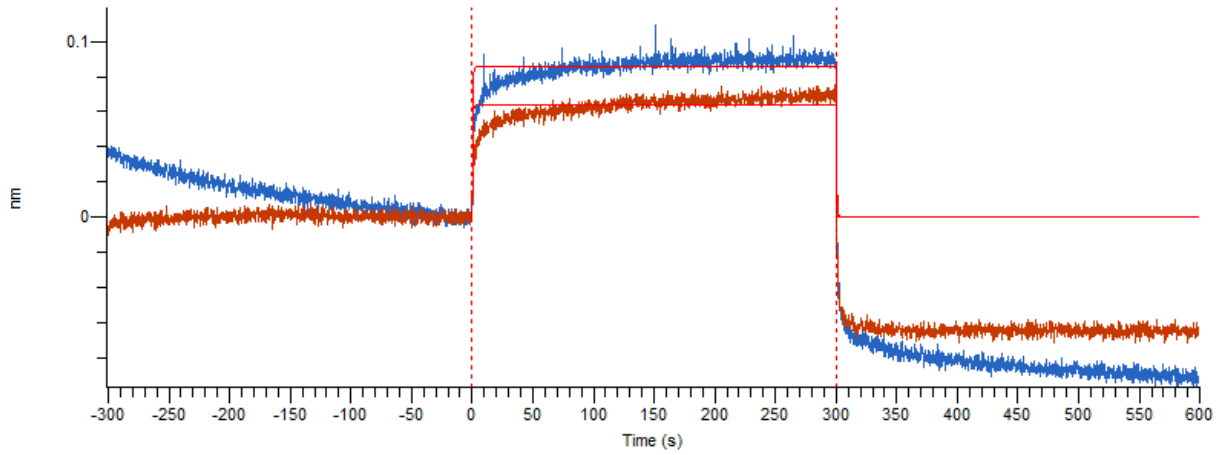

**Figure S134.** Binding of 50  $\mu\text{M}$  A1v2 to the RBD monitored with BLI.

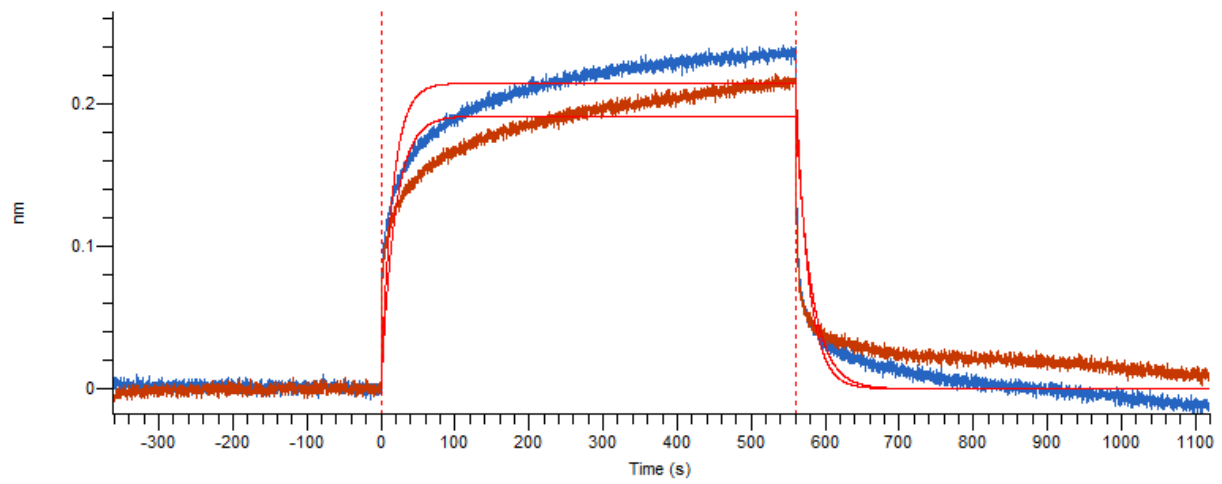

**Figure S135.** Binding of 50  $\mu\text{M}$  A1v3 to the RBD monitored with BLI.

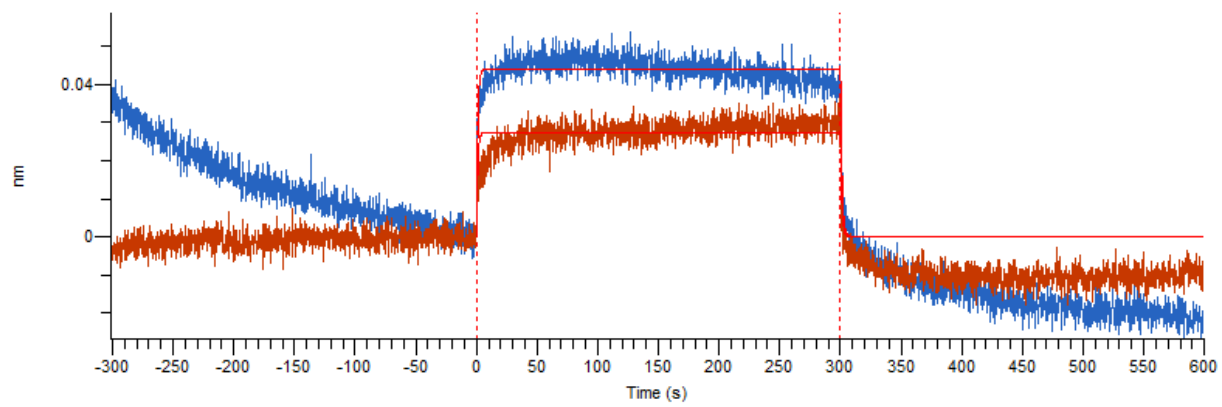

**Figure S136.** Binding of 50  $\mu\text{M}$  A1v4 to the RBD monitored with BLI.

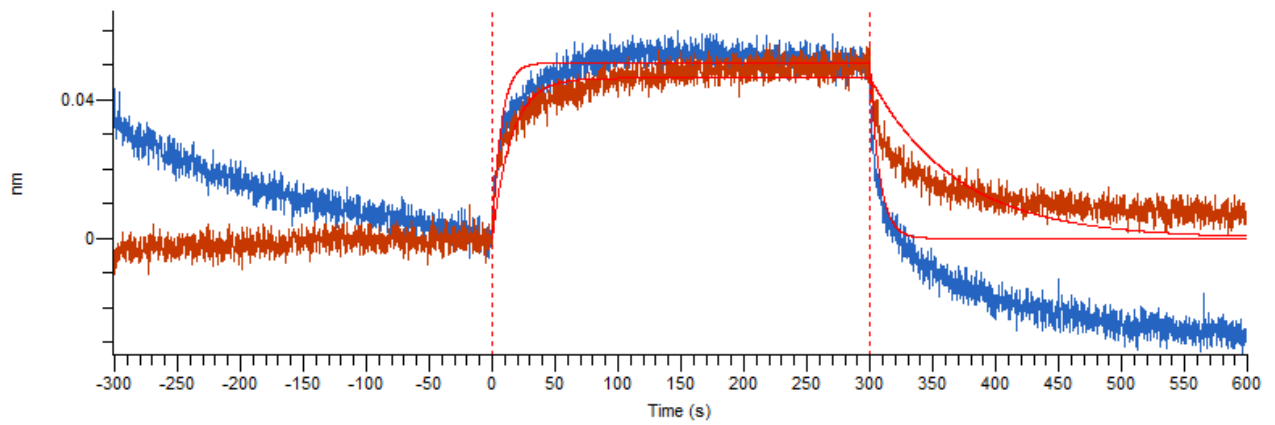

**Figure S137.** Binding of 50  $\mu\text{M}$  A2 to the RBD monitored with BLI.

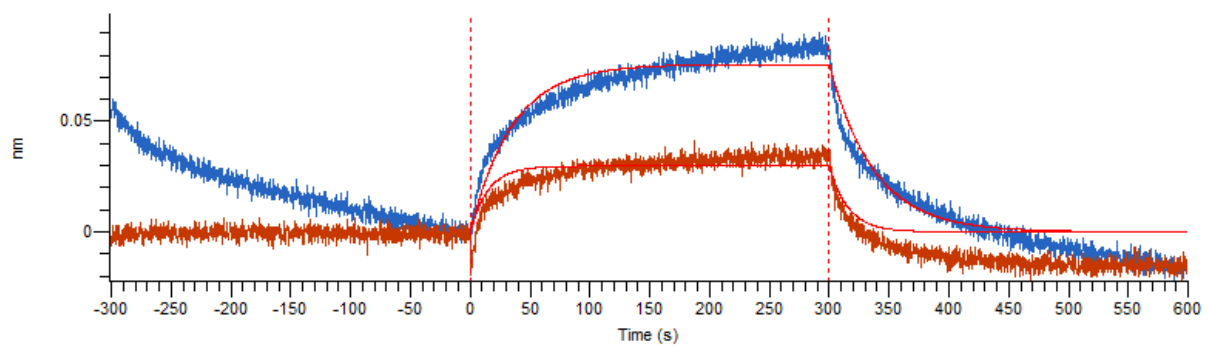

**Figure S138.** Binding of 50  $\mu\text{M}$  A2a to the RBD monitored with BLI.

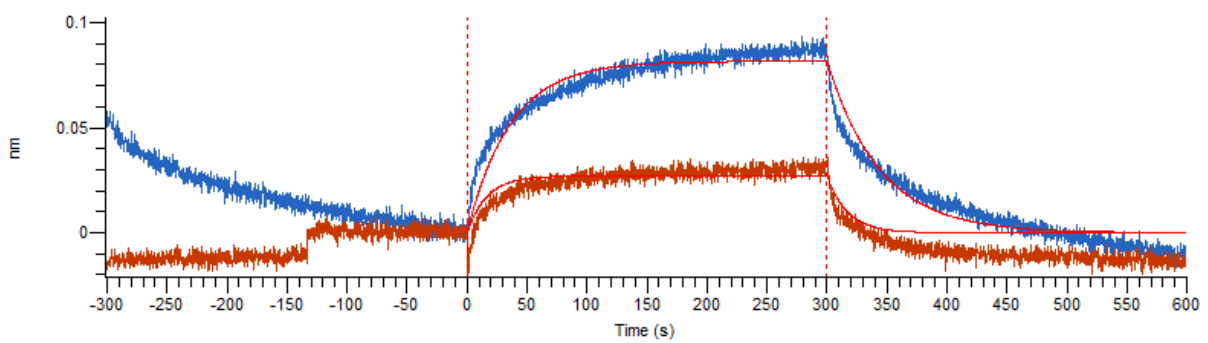

**Figure S139.** Binding of 50  $\mu\text{M}$  A2b to the RBD monitored with BLI.

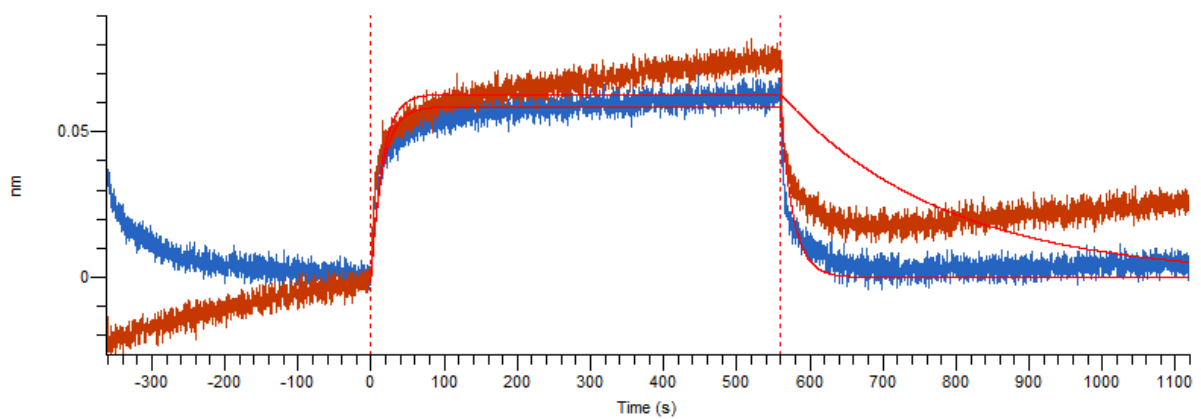

**Figure S140.** Binding of 50  $\mu\text{M}$  A2c to the RBD monitored with BLI.



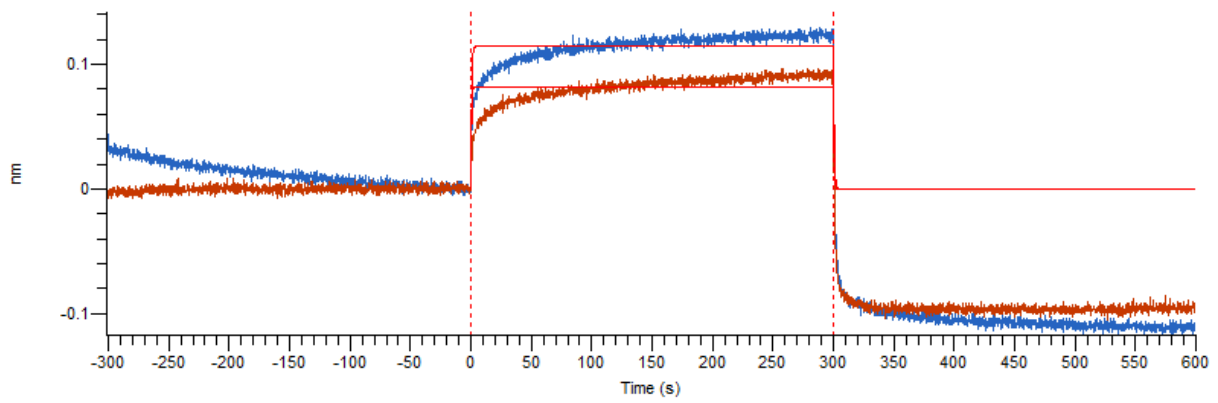

**Figure S141.** Binding of 50  $\mu\text{M}$  A2v1 to the RBD monitored with BLI.

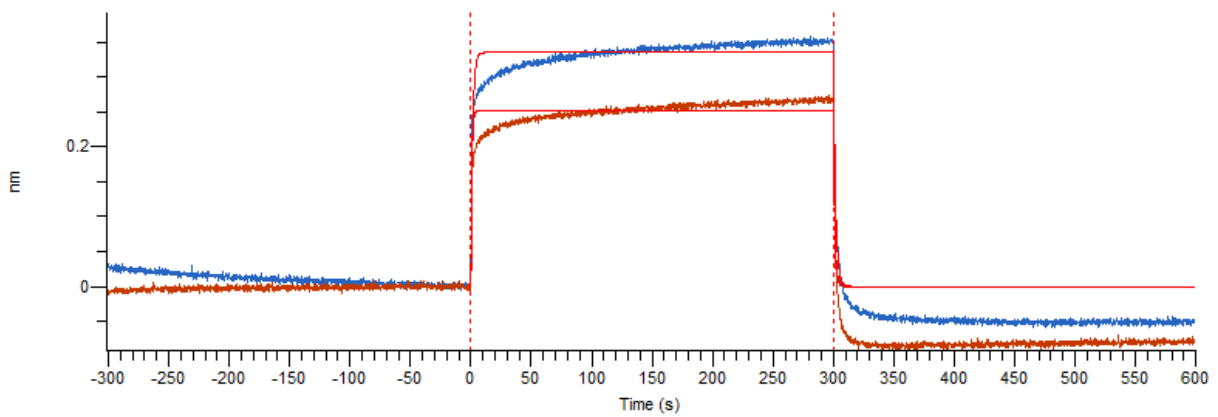

**Figure S142.** Binding of 50  $\mu\text{M}$  A2v2 to the RBD monitored with BLI.

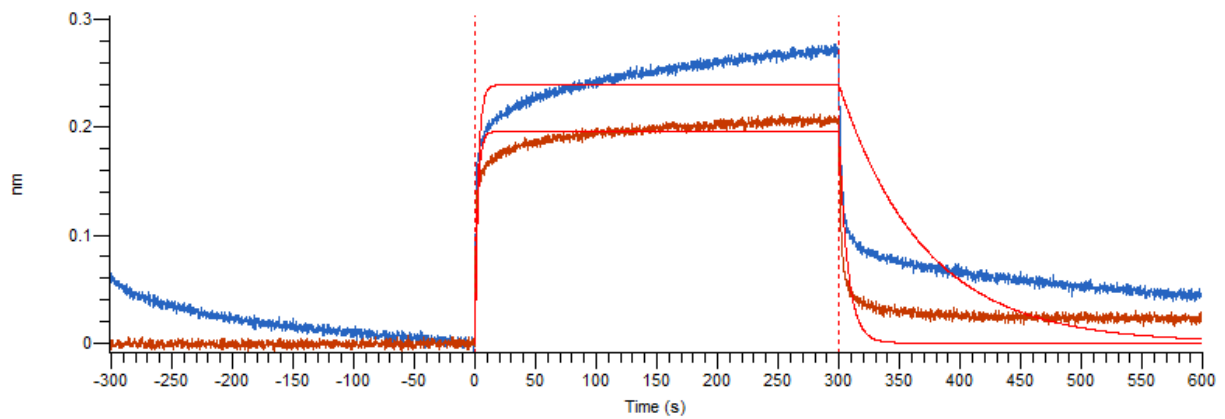

**Figure S143.** Binding of 50  $\mu\text{M}$  A2v3 to the RBD monitored with BLI.

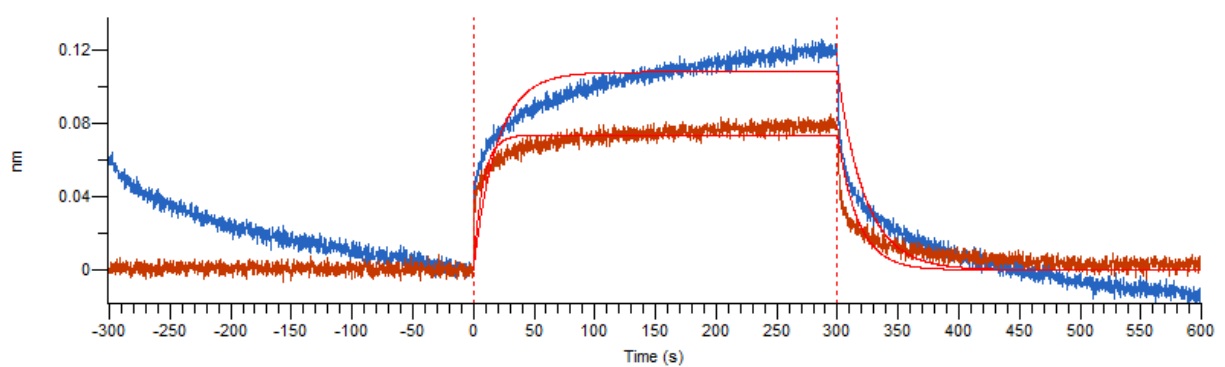

**Figure S144.** Binding of 50  $\mu\text{M}$  A2v4 to the RBD monitored with BLI.

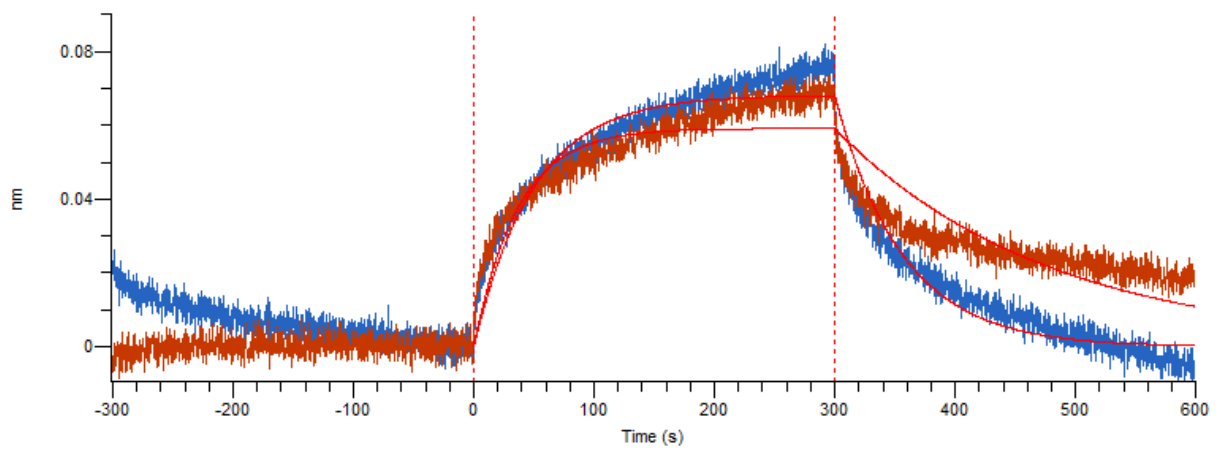

**Figure S145.** Binding of 50  $\mu\text{M}$  A3 to the RBD monitored with BLI.

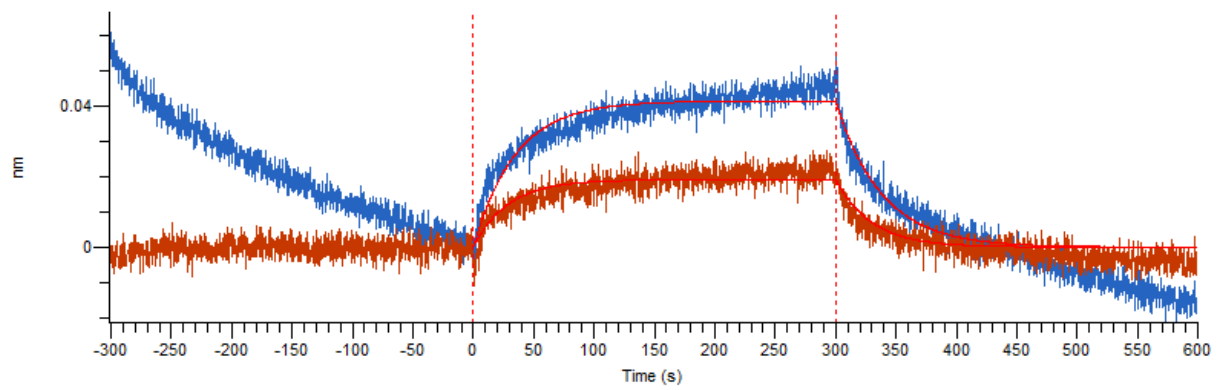

**Figure S146.** Binding of 50  $\mu\text{M}$  A3a to the RBD monitored with BLI.

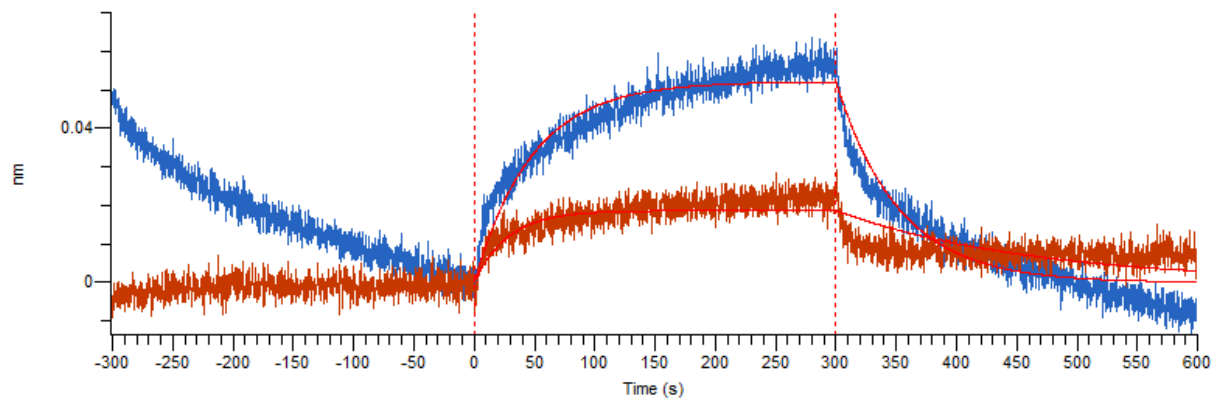

**Figure S147.** Binding of 50  $\mu\text{M}$  A3b to the RBD monitored with BLI.

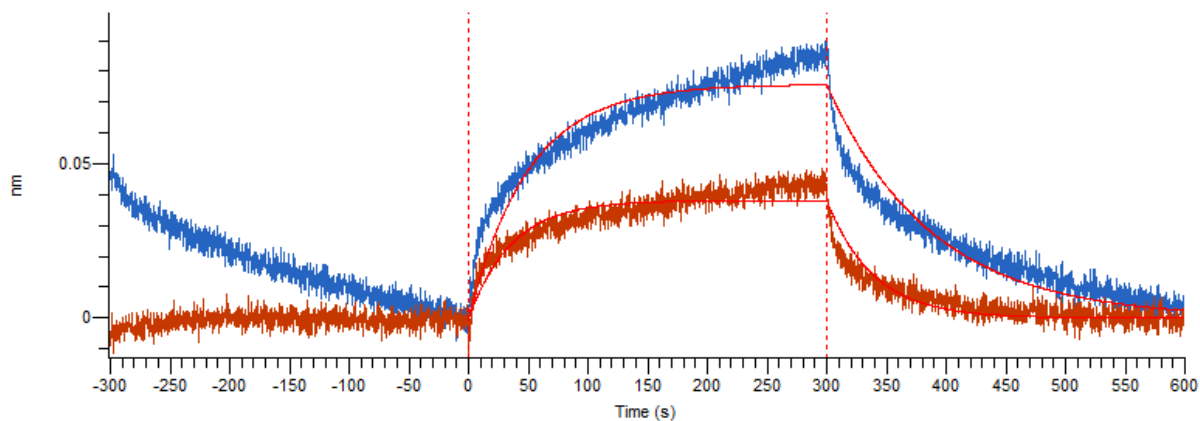

**Figure S148.** Binding of 50  $\mu\text{M}$  A3c to the RBD monitored with BLI.

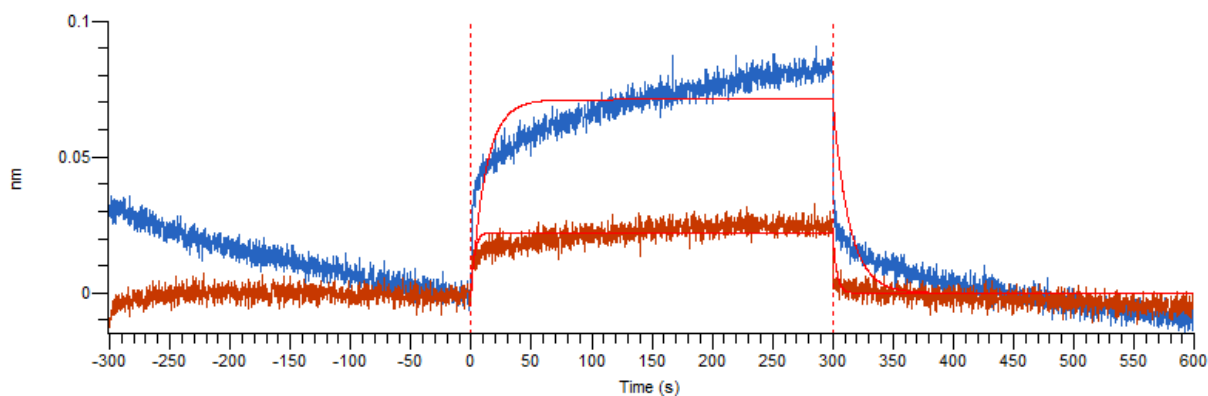

**Figure S149.** Binding of 50  $\mu\text{M}$  peptide 1 to the RBD monitored with BLI.

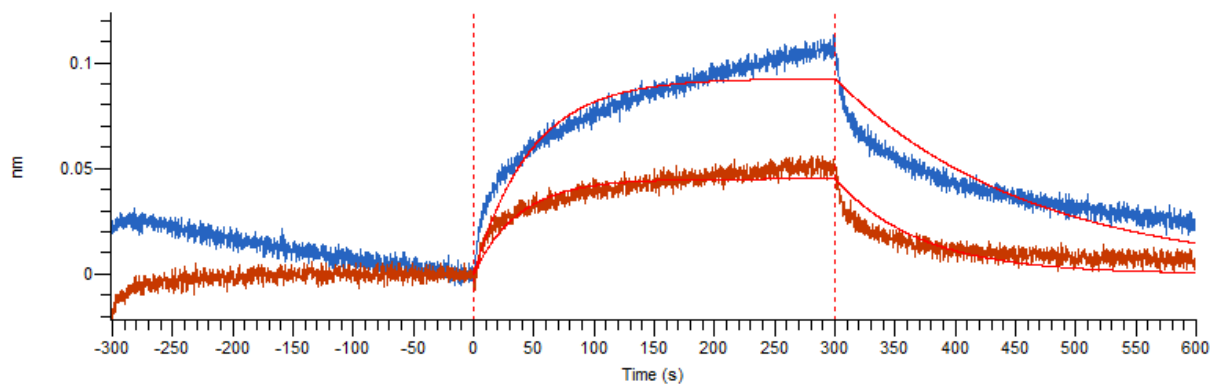

**Figure S150.** Binding of 50  $\mu\text{M}$  peptide 2 to the RBD monitored with BLI.

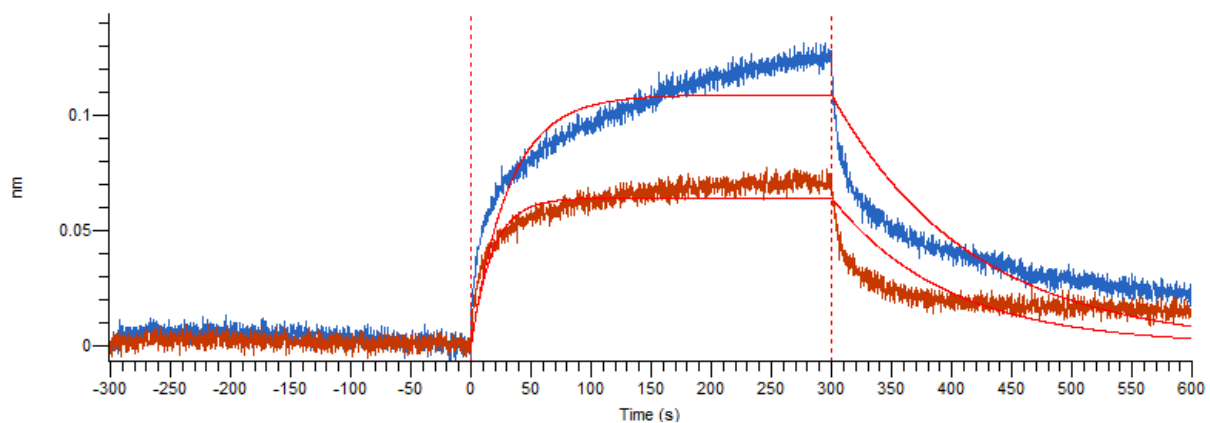

**Figure S151.** Binding of 50  $\mu\text{M}$  peptide 3 to the RBD monitored with BLI.

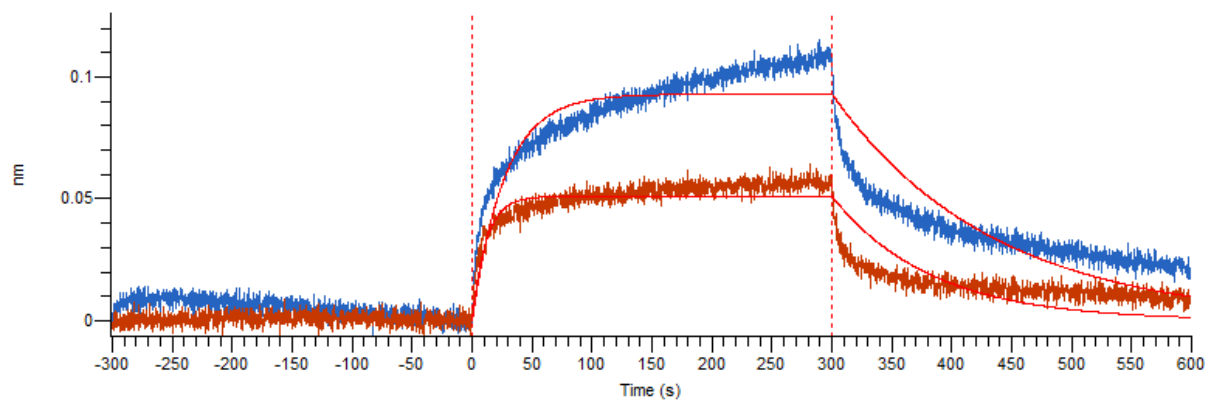

**Figure S152.** Binding of 50  $\mu\text{M}$  peptide 4 to the RBD monitored with BLI.

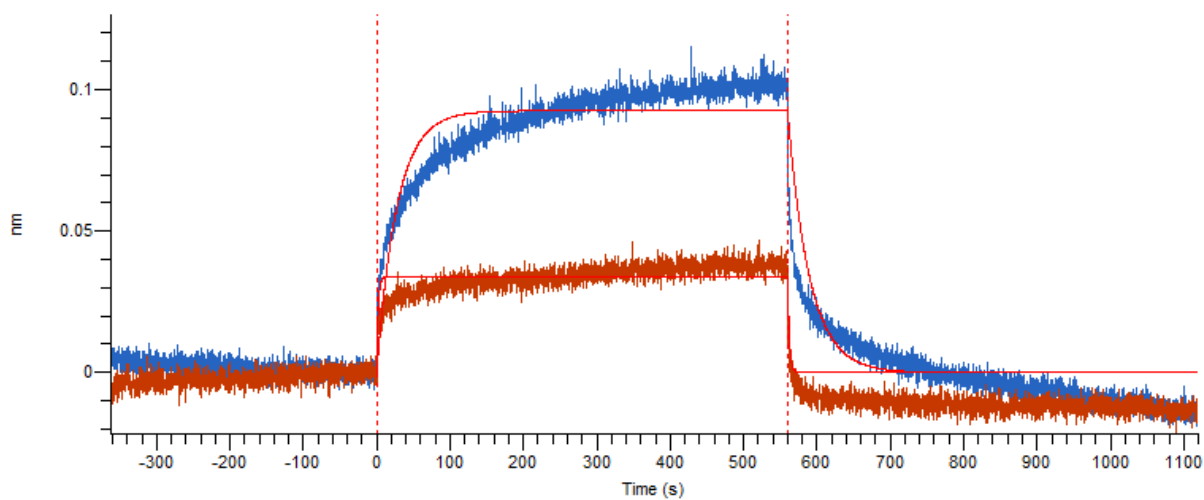

**Figure S153.** Binding of 50  $\mu\text{M}$  peptide 5 to the RBD monitored with BLI.

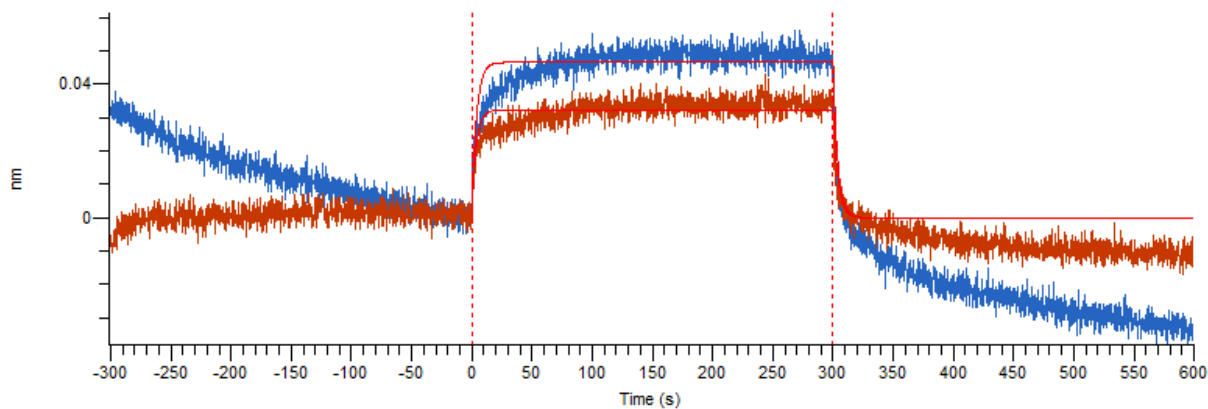

**Figure S154.** Binding of 50  $\mu\text{M}$  peptide 6 to the RBD monitored with BLI.

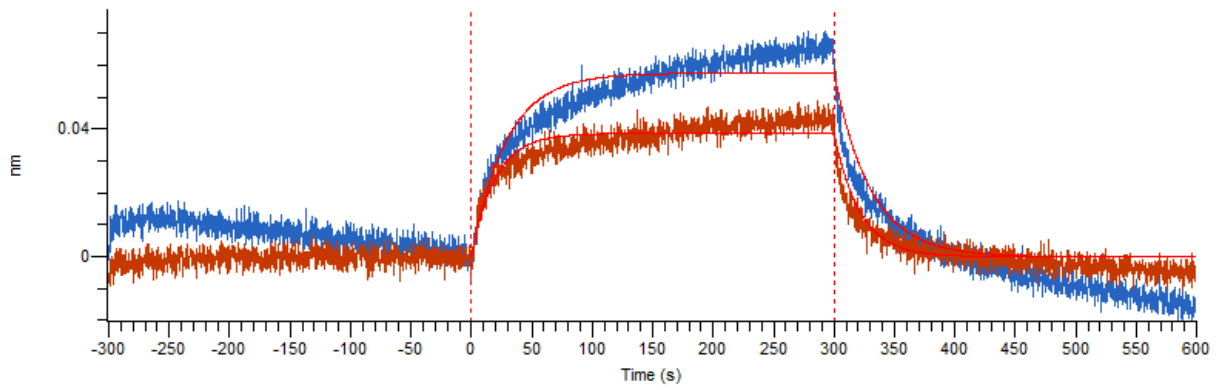

**Figure S155.** Binding of 50  $\mu\text{M}$  peptide **7** to the RBD monitored with BLI.

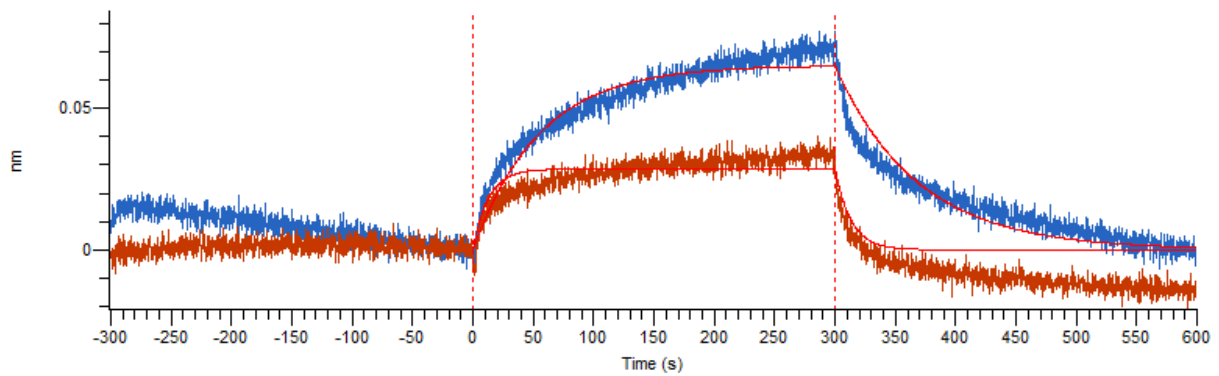

**Figure S156.** Binding of 50  $\mu\text{M}$  peptide **8** to the RBD monitored with BLI.

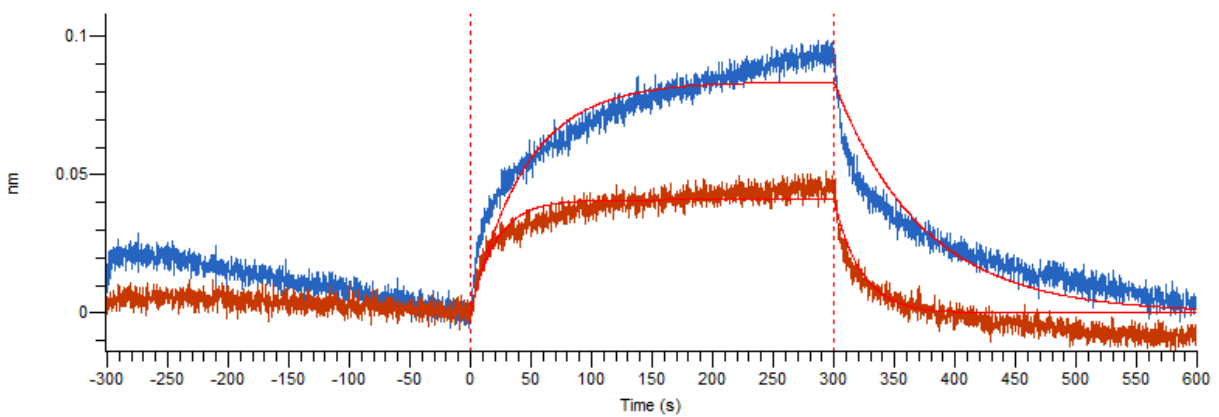

**Figure S157.** Binding of 50  $\mu\text{M}$  peptide **9** to the RBD monitored with BLI.

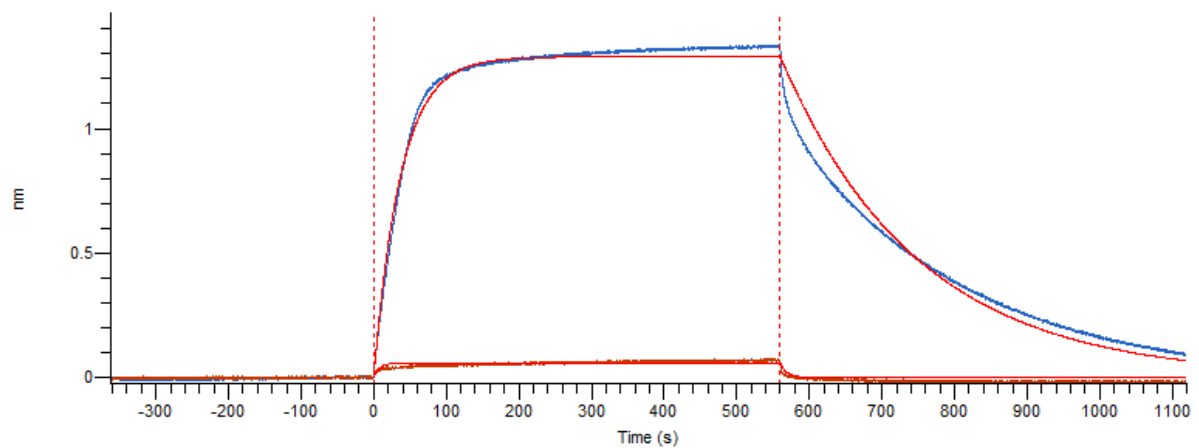

**Figure S158.** Binding of 50  $\mu\text{M}$  peptide **10** to the RBD monitored with BLI.

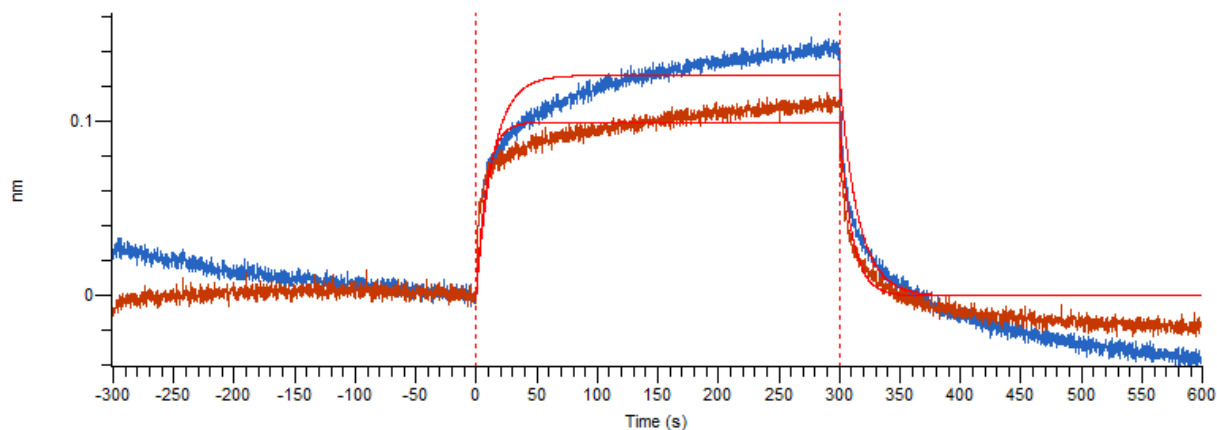

**Figure S159.** Binding of 50  $\mu\text{M}$  peptide **11** to the RBD monitored with BLI.

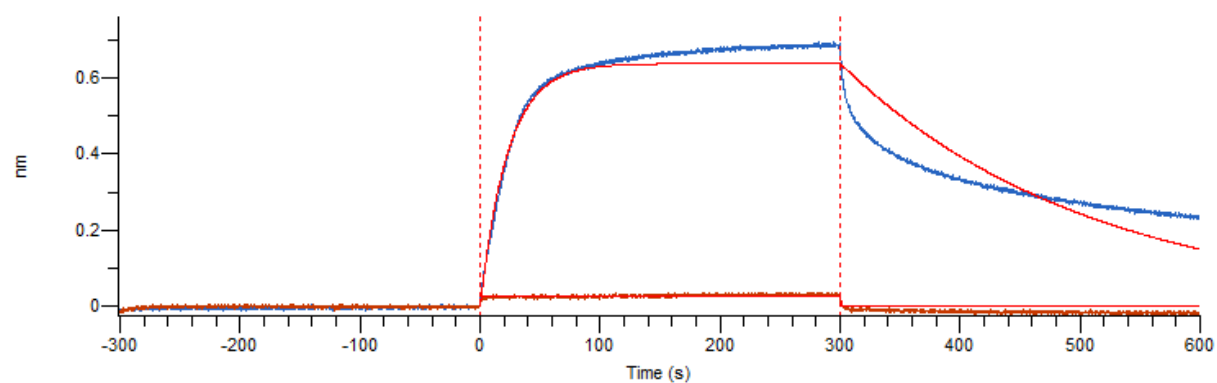

**Figure S160.** Binding of 50  $\mu\text{M}$  peptide **12** to the RBD monitored with BLI.

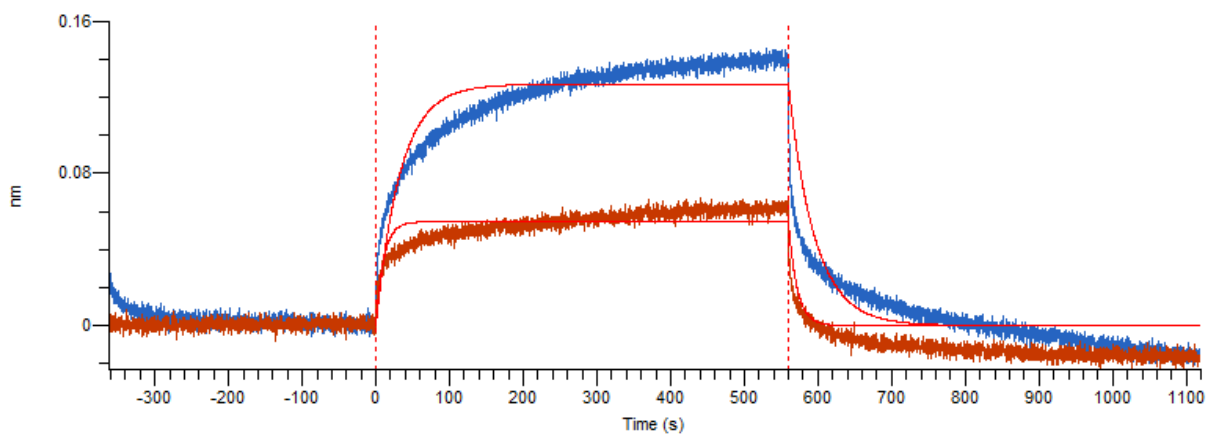

**Figure S161.** Binding of 50  $\mu\text{M}$  peptide **13** to the RBD monitored with BLI.

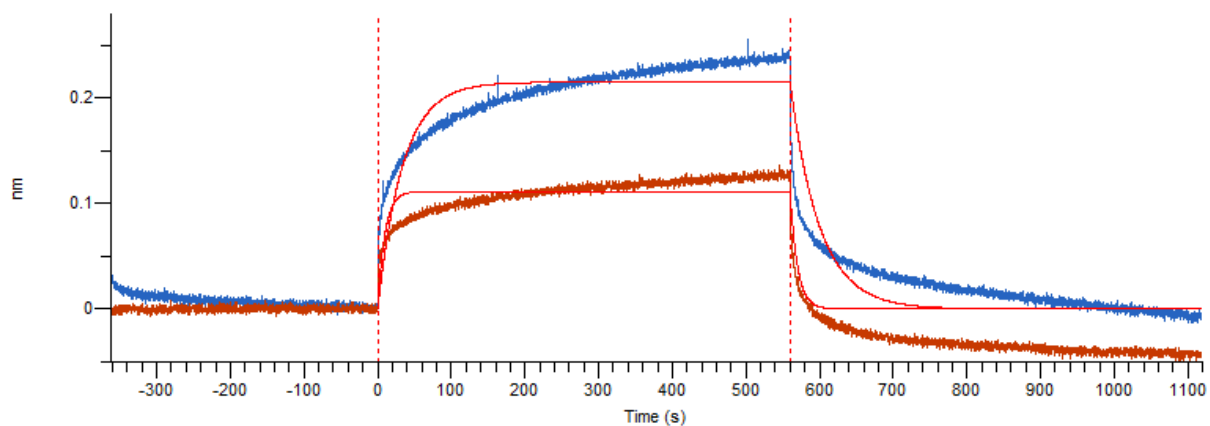

**Figure S162.** Binding of 50 μM peptide **14** to the RBD monitored with BLI.

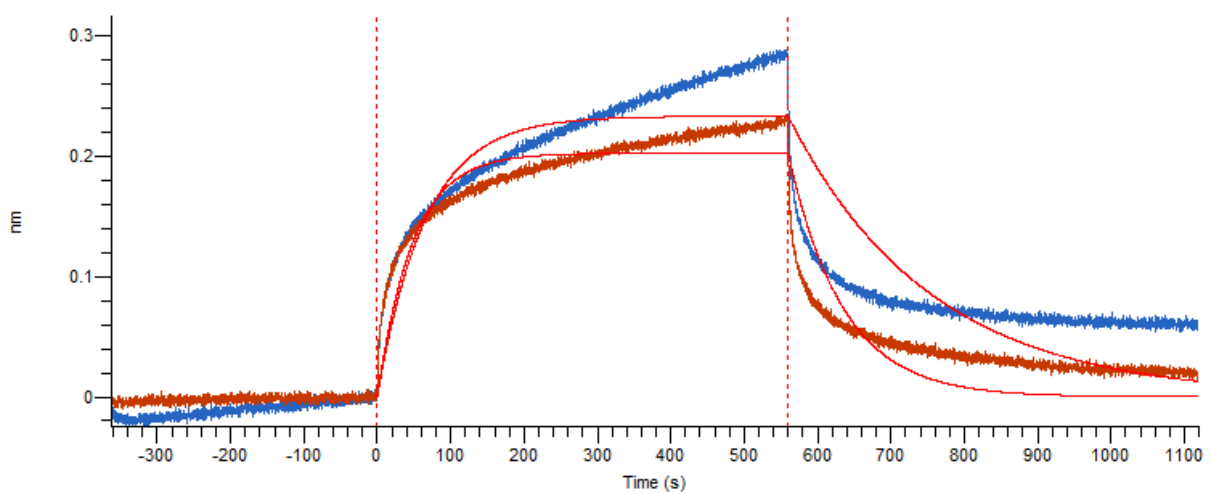

**Figure S163.** Binding of 50 μM peptide **15** to the RBD monitored with BLI.

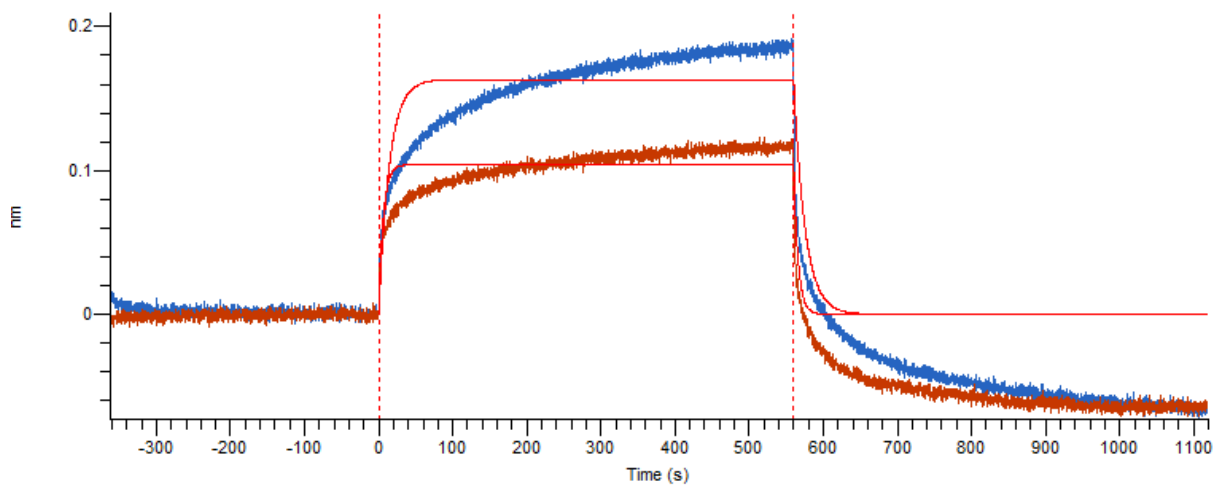

**Figure S164.** Binding of 50 μM peptide **16** to the RBD monitored with BLI.

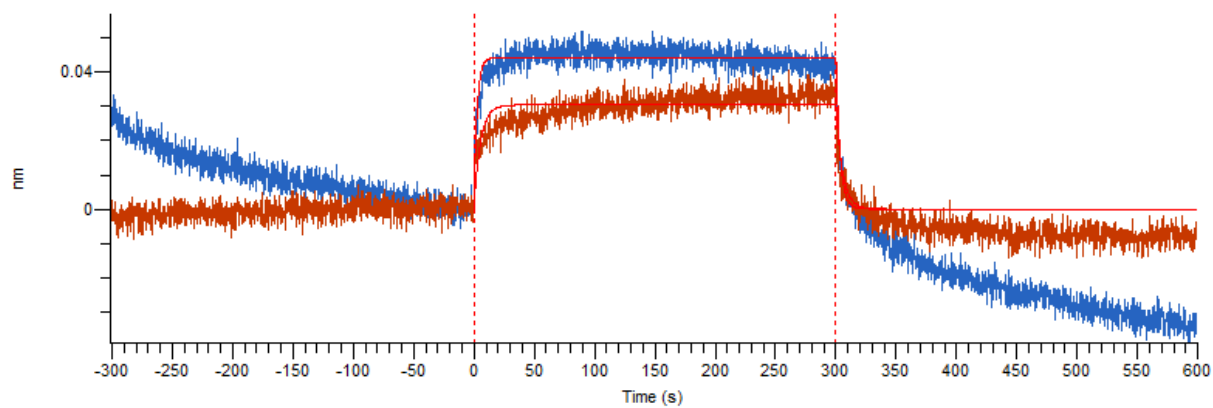

**Figure S165.** Binding of 50  $\mu\text{M}$  peptide **17** to the RBD monitored with BLI.

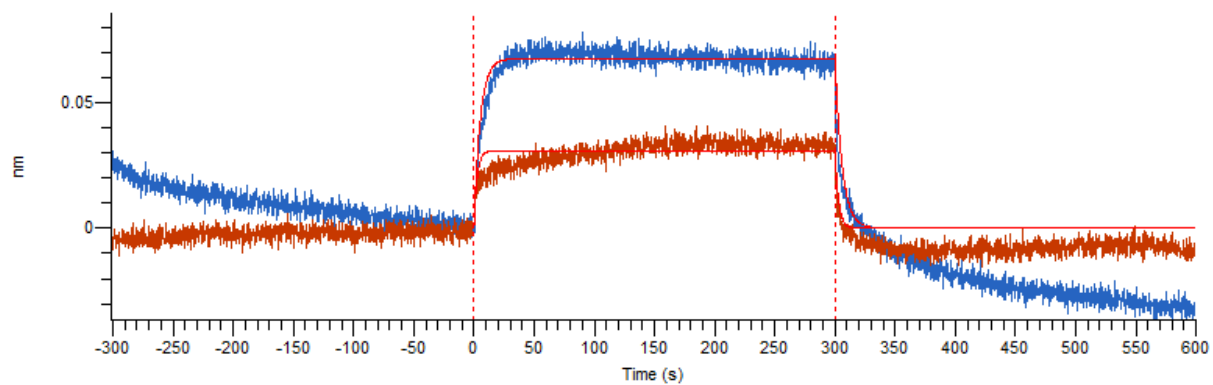

**Figure S166.** Binding of 50  $\mu\text{M}$  peptide **18** to the RBD monitored with BLI.

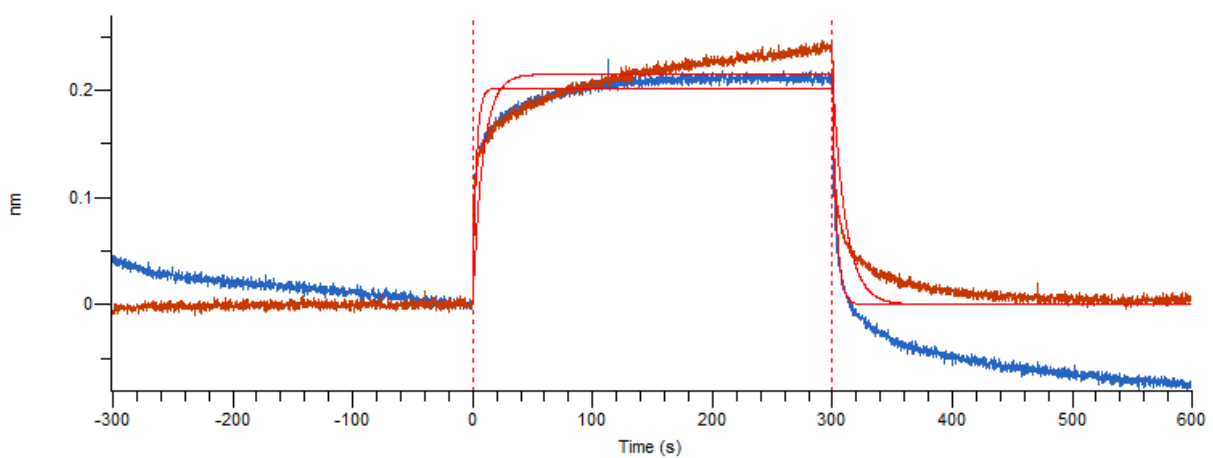

**Figure S167.** Binding of 50  $\mu\text{M}$  peptide **19** to the RBD monitored with BLI.



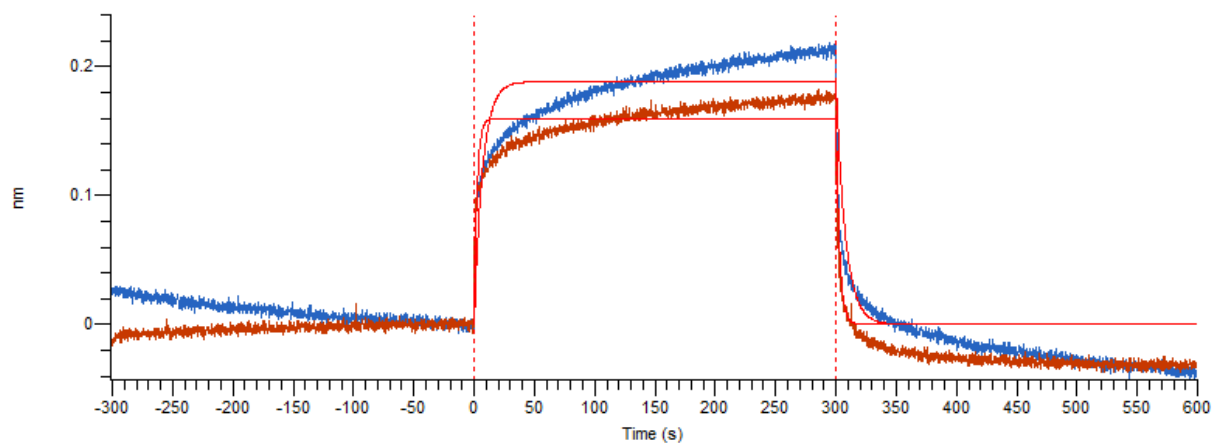

**Figure S168.** Binding of 50  $\mu\text{M}$  peptide **20** to the RBD monitored with BLI.

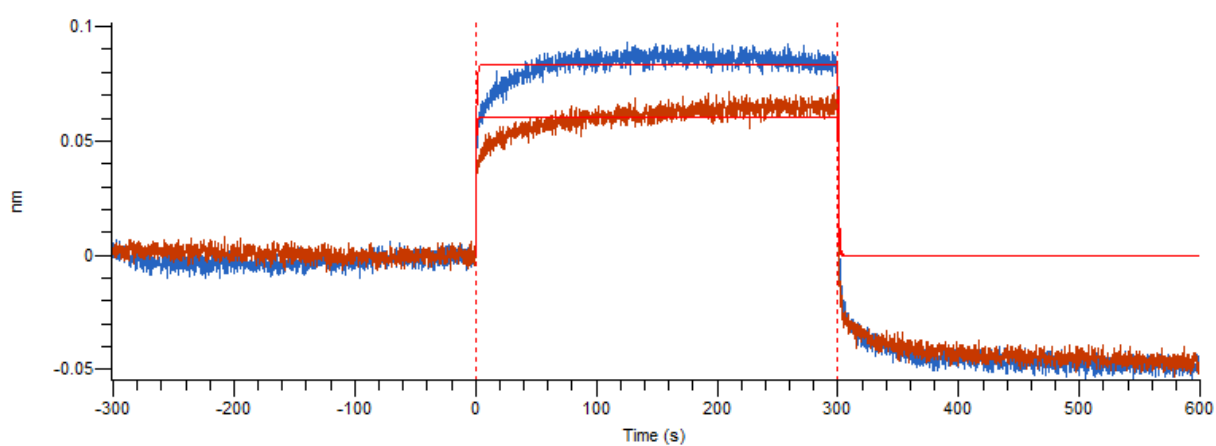

**Figure S169.** Binding of 50  $\mu\text{M}$  peptide **21** to the RBD monitored with BLI.

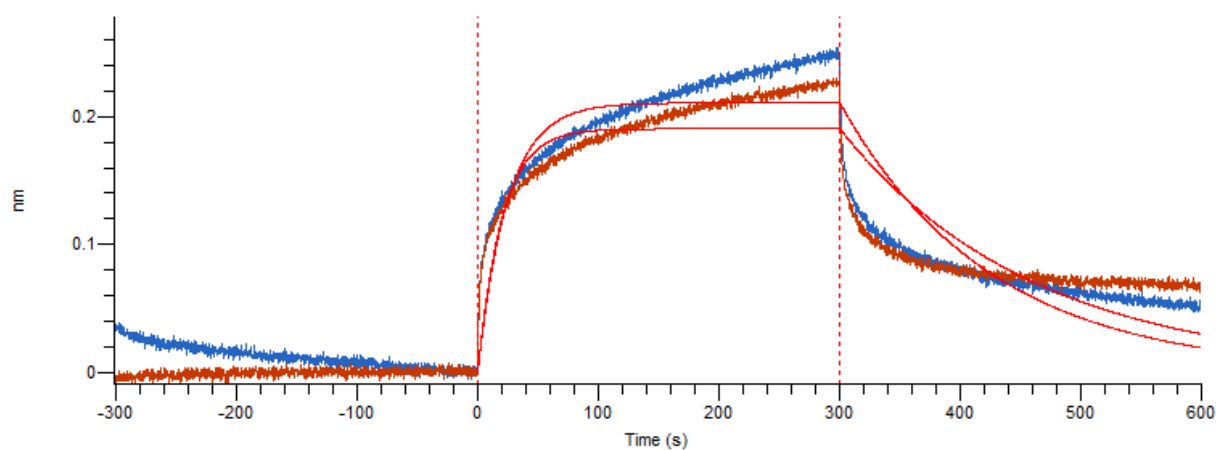

**Figure S170.** Binding of 50  $\mu\text{M}$  peptide **22** to the RBD monitored with BLI.

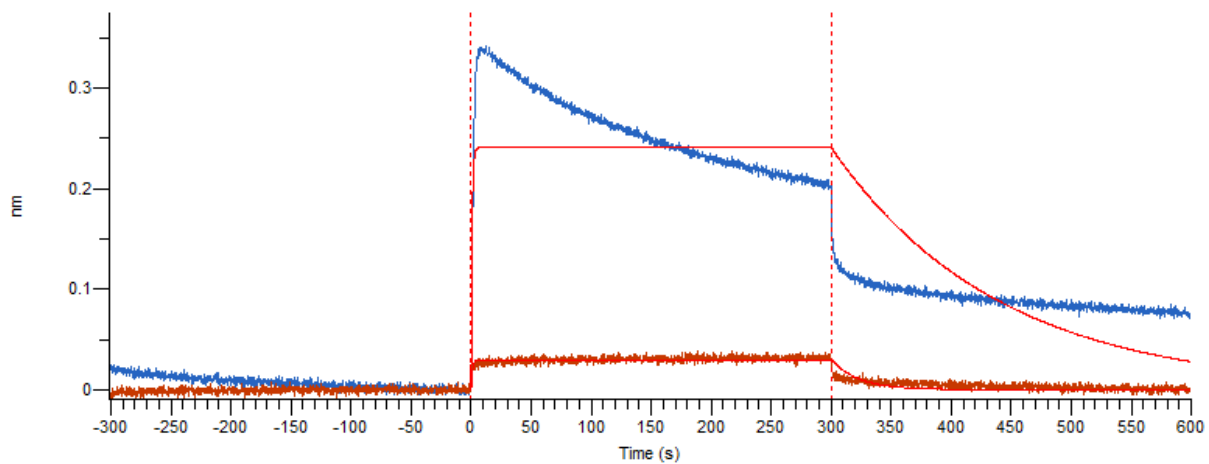

**Figure S171.** Binding of 50  $\mu\text{M}$  peptide **23** to the RBD monitored with BLI.

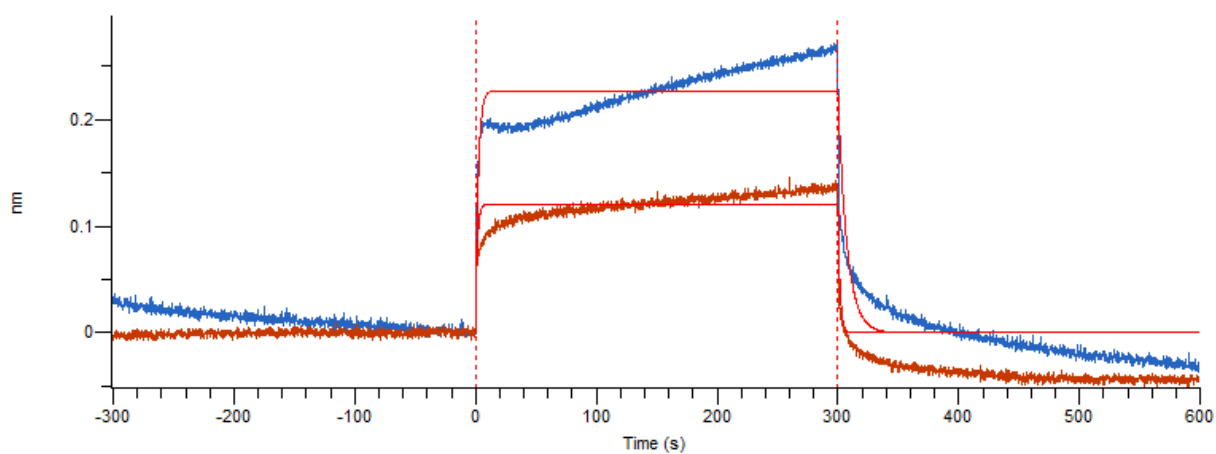

**Figure S172.** Binding of 50  $\mu\text{M}$  peptide **24** to the RBD monitored with BLI.

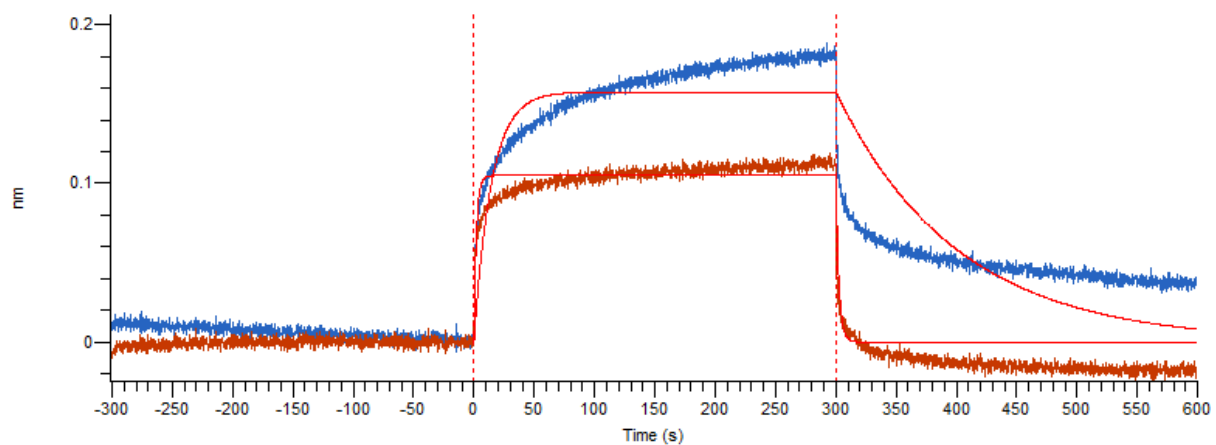

**Figure S173.** Binding of 50  $\mu\text{M}$  peptide **25** to the RBD monitored with BLI.

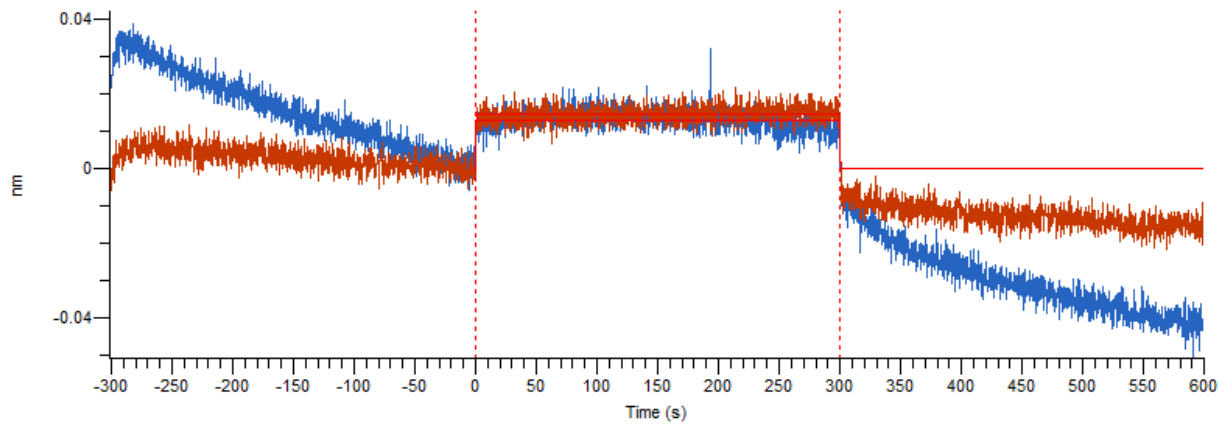

**Figure S174.** Binding of 50  $\mu\text{M}$  peptide **26** to the RBD monitored with BLI.

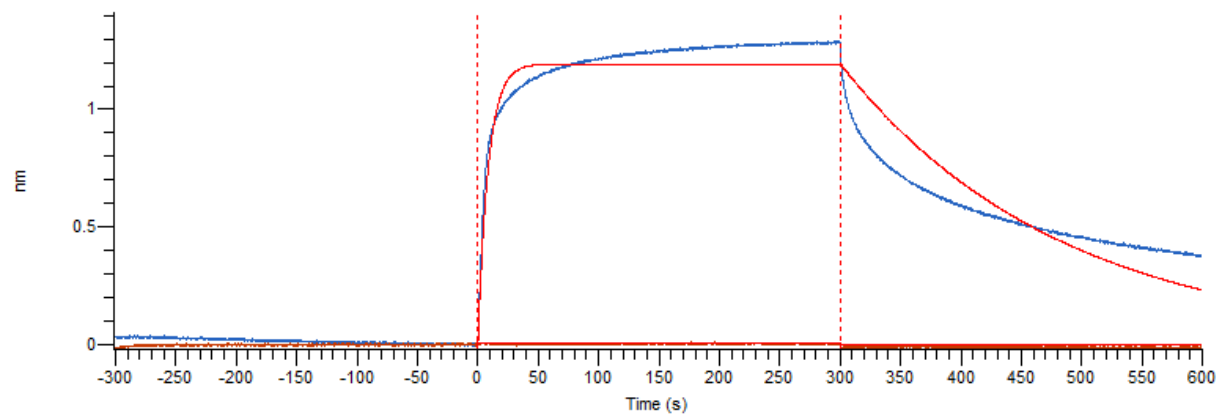

**Figure S175.** Binding of 50  $\mu\text{M}$  peptide **27** to the RBD monitored with BLI.

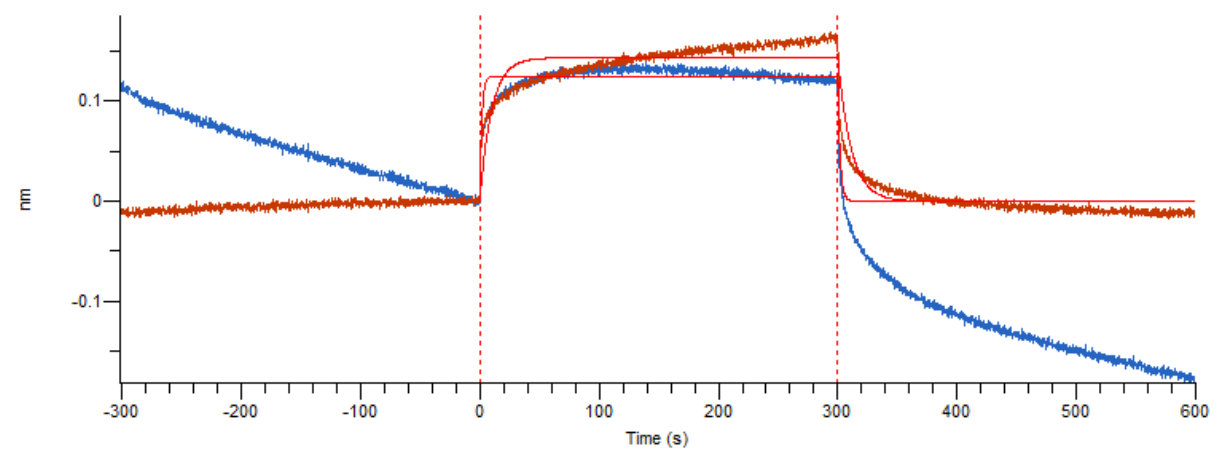

**Figure S176.** Binding of 50  $\mu\text{M}$  peptide **28** to the RBD monitored with BLI.

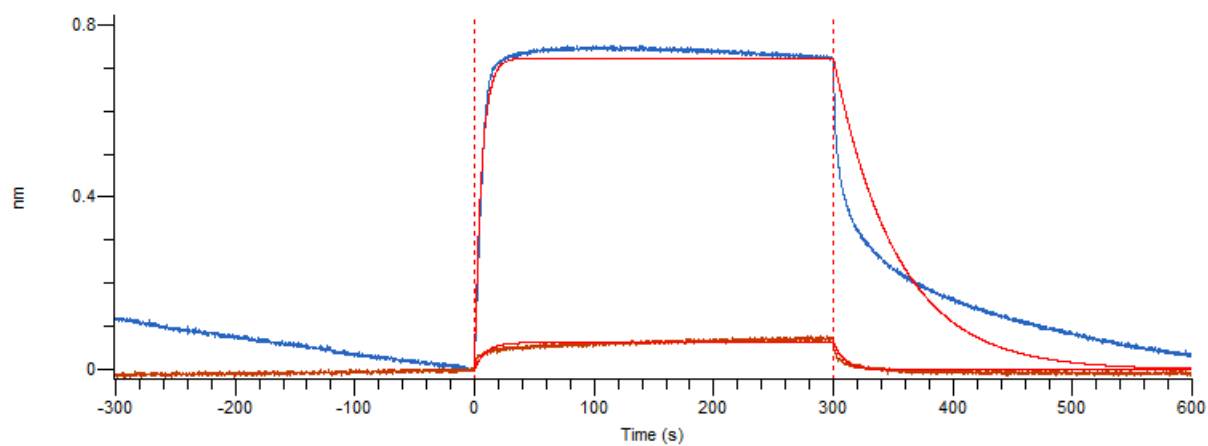

**Figure S177.** Binding of 50  $\mu\text{M}$  peptide **29** to the RBD monitored with BLI.

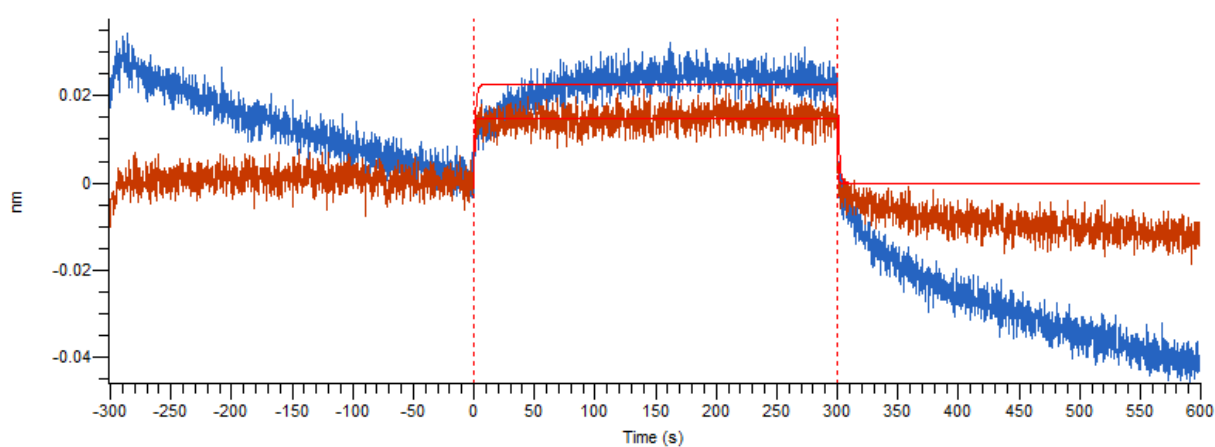

**Figure S178.** Binding of 50  $\mu\text{M}$  peptide **30** to the RBD monitored with BLI.

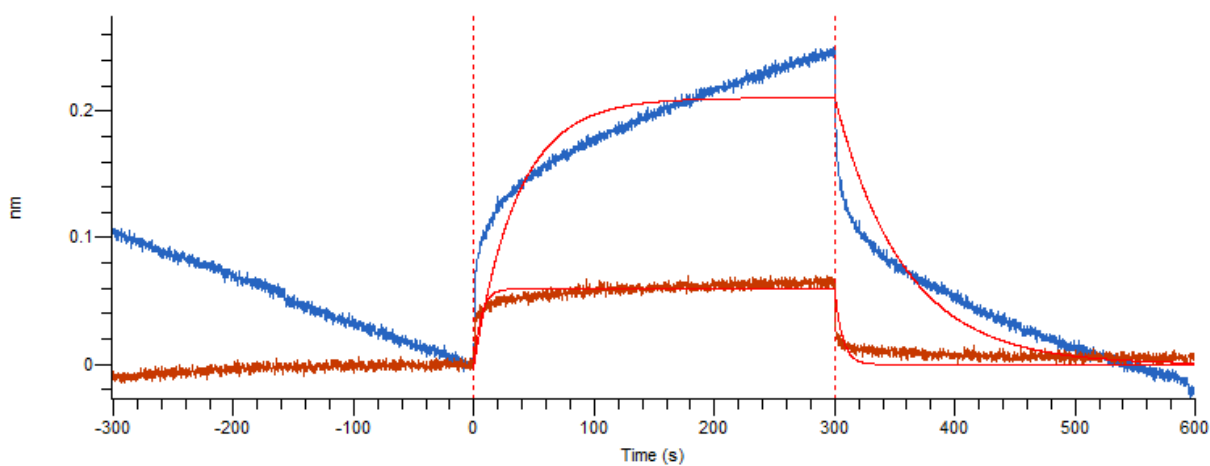

**Figure S179.** Binding of 50  $\mu\text{M}$  peptide **31** to the RBD monitored with BLI.

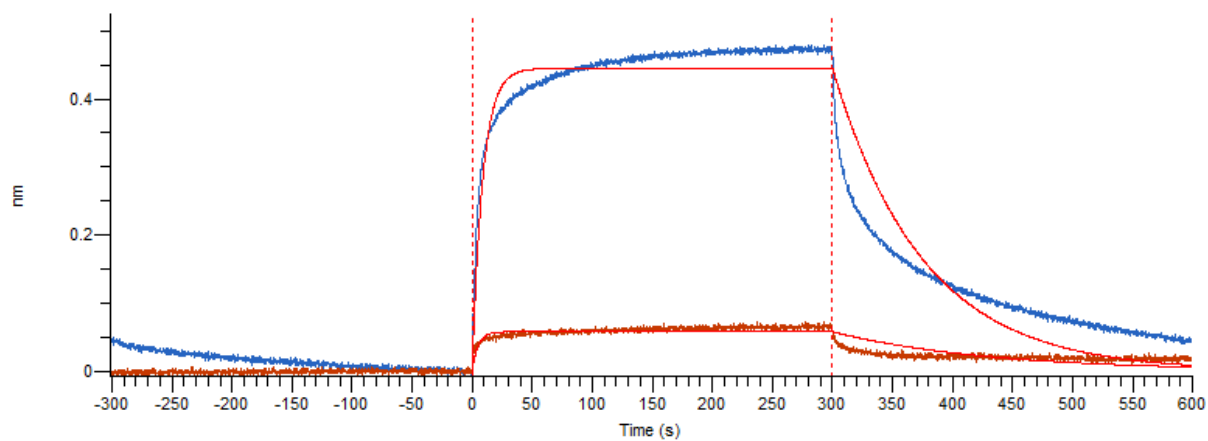

**Figure S180.** Binding of 50  $\mu\text{M}$  peptide **32** to the RBD monitored with BLI.

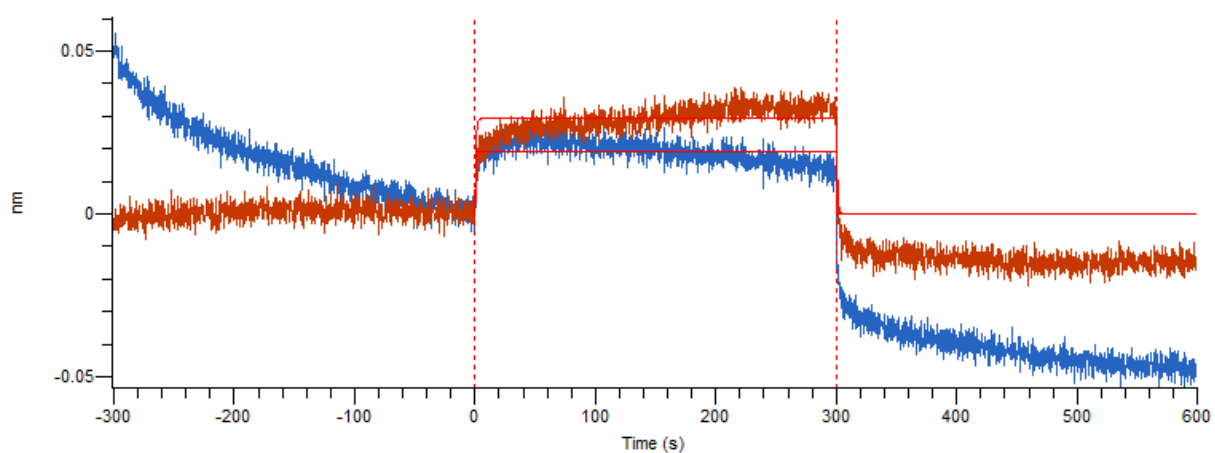

**Figure S181.** Binding of 50  $\mu\text{M}$  peptide **33** to the RBD monitored with BLI.

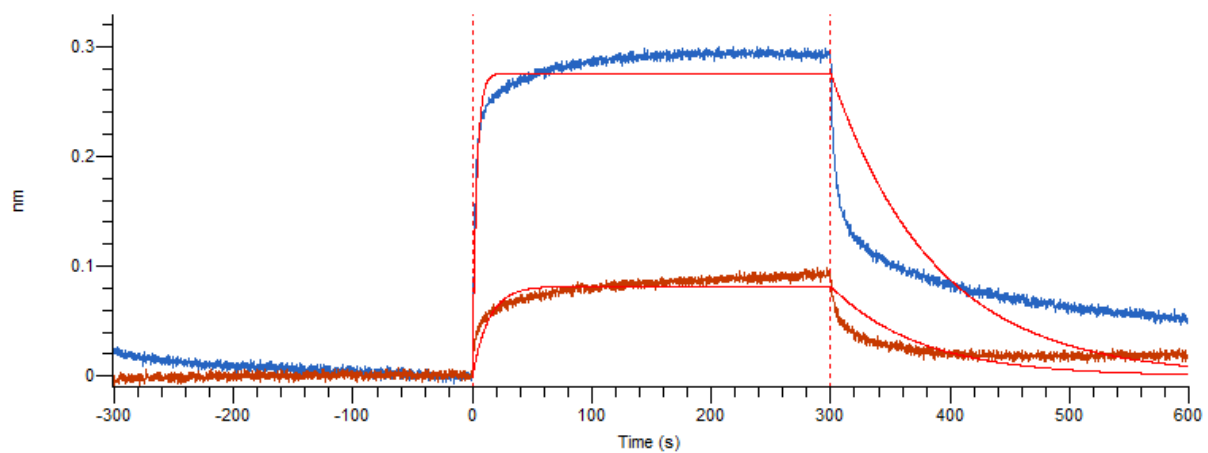

**Figure S182.** Binding of 50  $\mu\text{M}$  peptide **34** to the RBD monitored with BLI.

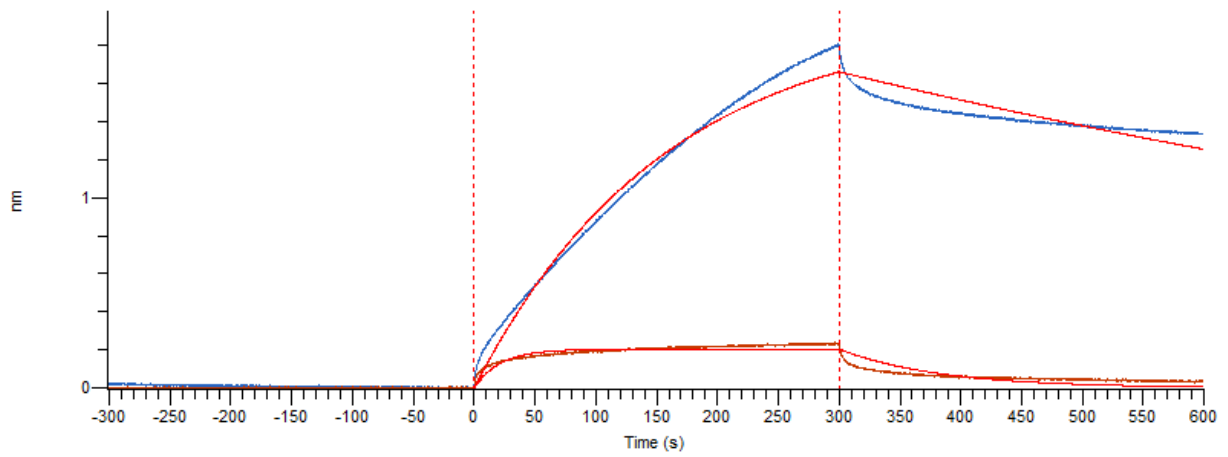

**Figure S183.** Binding of 50  $\mu\text{M}$  peptide **35** to the RBD monitored with BLI.

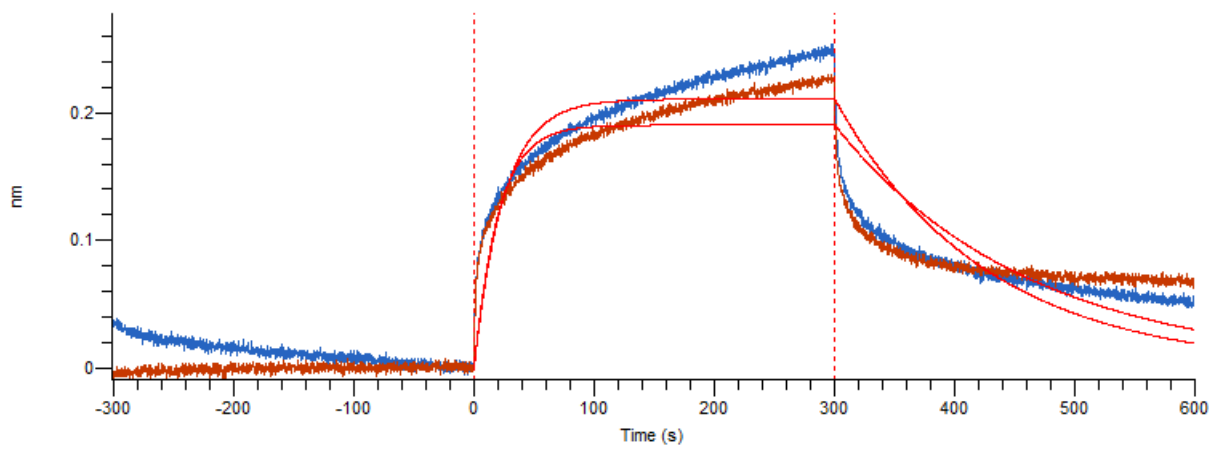

**Figure S184.** Binding of 50  $\mu\text{M}$  peptide **36** to the RBD monitored with BLI.

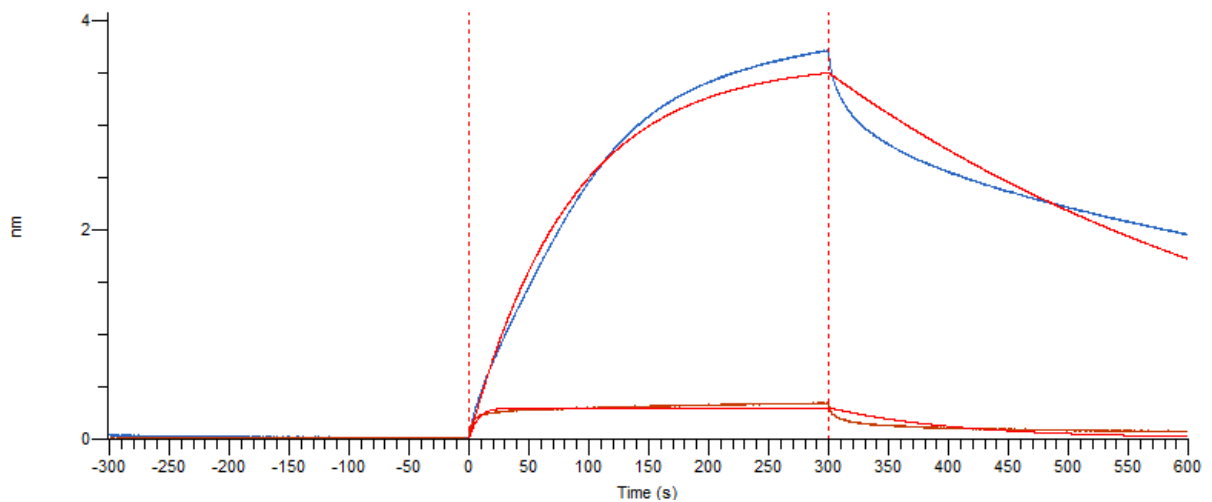

**Figure S185.** Binding of 50  $\mu\text{M}$  peptide **37** to the RBD monitored with BLI.

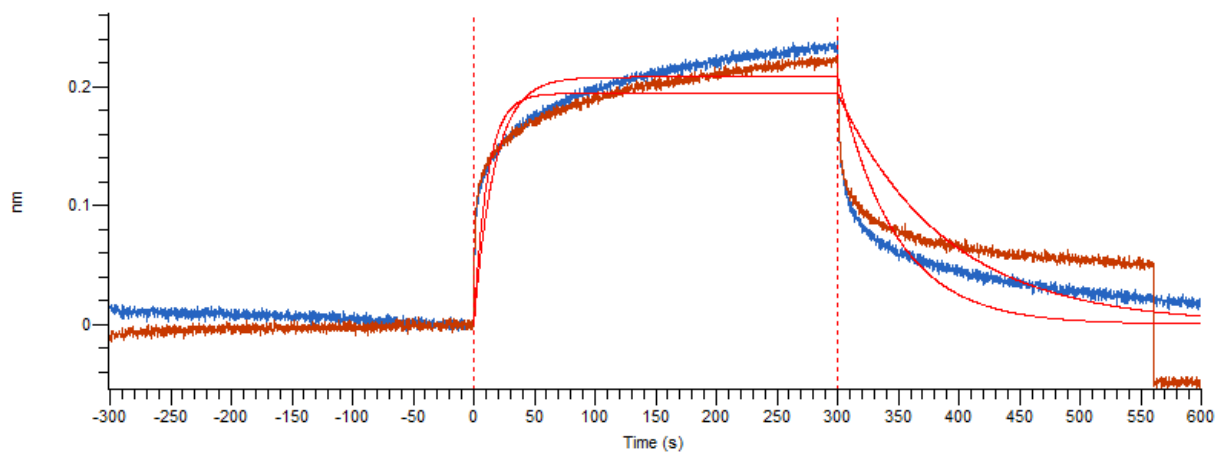

**Figure S186.** Binding of 50  $\mu\text{M}$  peptide **38** to the RBD monitored with BLI.

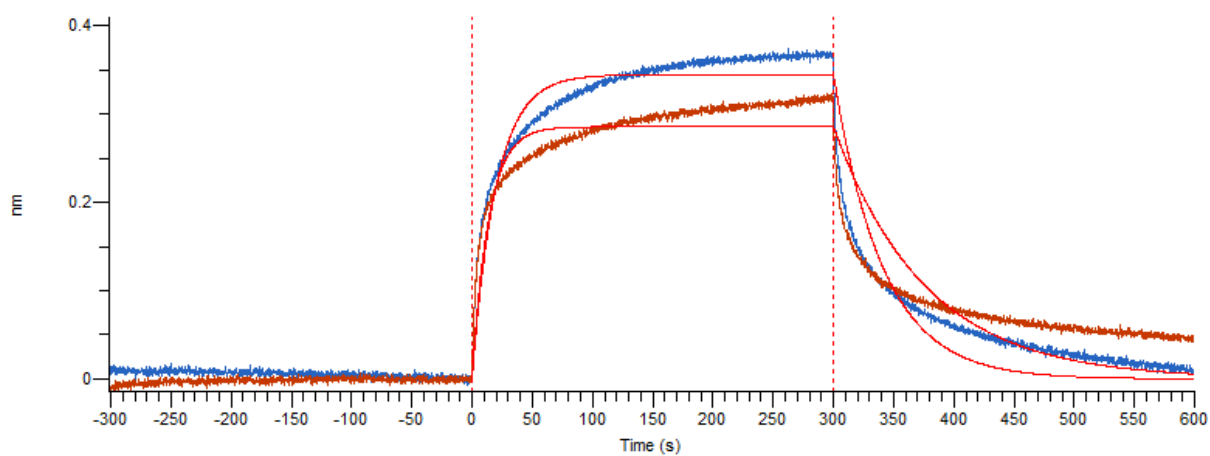

**Figure S187.** Binding of 50  $\mu\text{M}$  peptide **39** to the RBD monitored with BLI.

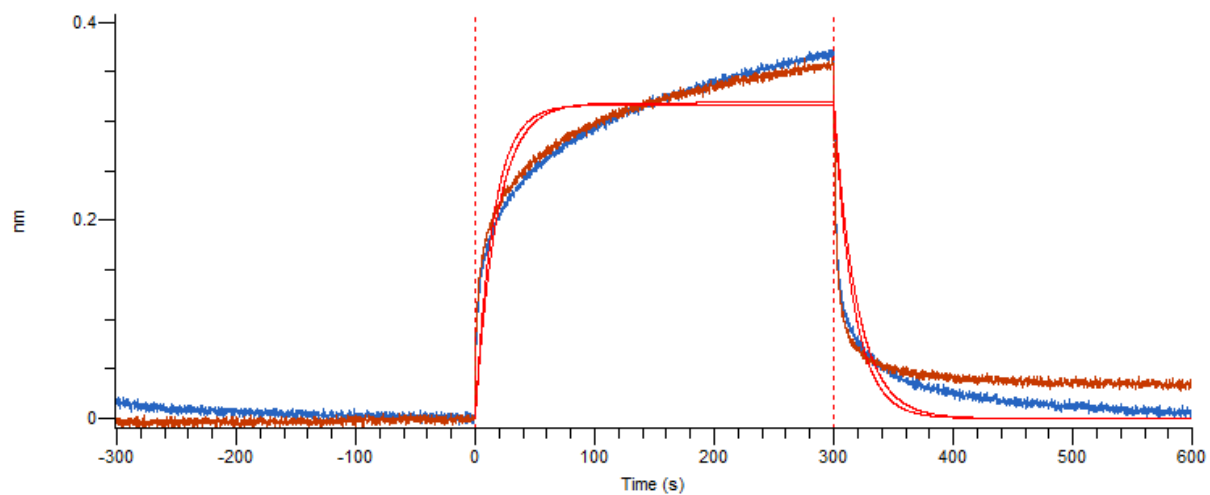

**Figure S188.** Binding of 50  $\mu\text{M}$  peptide **40** to the RBD monitored with BLI.

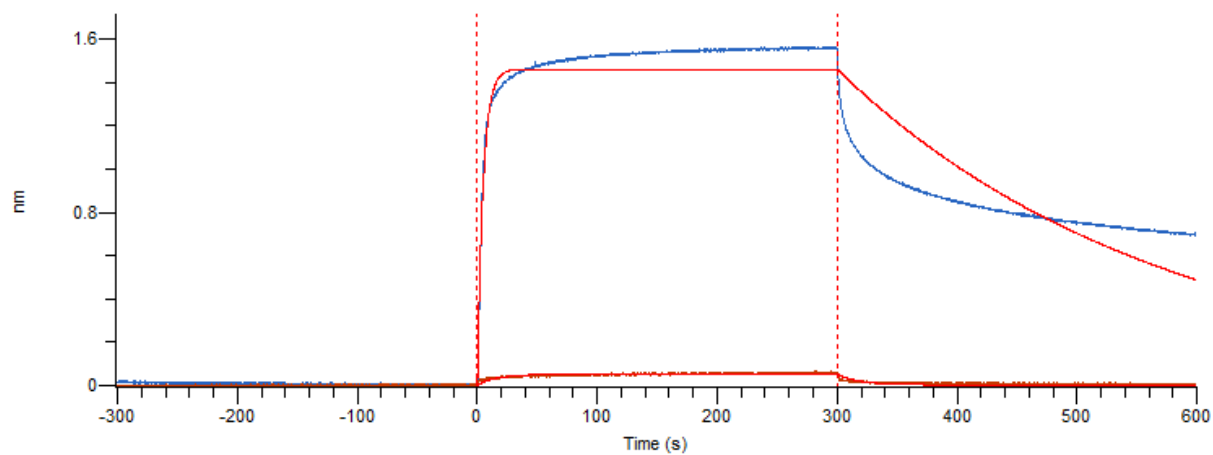

**Figure S189.** Binding of 50  $\mu$ M peptide **41** to the RBD monitored with BLI.



**Table S4.** Chemical shifts of peptide **27**. Cp stands for *trans*-(1*S*,2*S*)-2-amino-1-cyclopentanecarboxylic acid.

| Residue | Proton          | Chemical shift [ppm]                         |
|---------|-----------------|----------------------------------------------|
| Arg1    | HN              | 7.86                                         |
|         | HA              | 3.93                                         |
|         | HB              | 1.94 (2)<br>1.98 (1)                         |
|         | HG              | 1.71                                         |
|         | HD              | 3.24                                         |
|         | Asp2            | HN                                           |
|         | HA              | 4.80                                         |
|         | HB              | 2.81 (2)<br>2.97 (1)                         |
| Asp3    | HN              | 8.87                                         |
|         | HA              | 4.65                                         |
|         | HB              | 2.83 (2)<br>2.93 (1)                         |
| Glu4    | HN              | 8.26                                         |
|         | HA              | 4.36                                         |
|         | HB              | 2.09 (2)<br>2.25 (1)                         |
|         | HG              | 2.41 (2)<br>2.48 (1)                         |
| Cp5     | HN              | 7.85                                         |
|         | HA              | 2.58                                         |
|         | HB              | 4.37                                         |
|         | HG, D, E        | 1.76 (4)<br>1.87 (3)<br>1.95 (2)<br>2.05 (1) |
| Arg6    | HN              | 8.30                                         |
|         | HA              | 3.89                                         |
|         | HB              | 1.59 (2)<br>1.71 (1)                         |
|         | HG              | 1.35 (2)<br>1.43 (1)                         |
|         | HD              | 2.90 (2)<br>2.97 (1)                         |
|         | HE              | 7.25                                         |
| Trp7    | HN              | 7.95                                         |
|         | HA              | 4.67                                         |
|         | HB              | 3.41 (2)<br>3.55 (1)                         |
|         | HD1             | 7.26                                         |
|         | HE1             | 10.27                                        |
|         | HZ2             | 7.36                                         |
|         | HE3             | 7.68                                         |
|         | HH2             | 7.12                                         |
| Leu8    | HZ3             | 7.07                                         |
|         | HN              | 8.07                                         |
|         | HA              | 4.30                                         |
|         | HB              | 1.65 (2)<br>1.73 (1)                         |
|         | HG              | 1.64                                         |
| Cp9     | HD              | 0.96                                         |
|         | HN              | 7.99                                         |
|         | HA              | 2.80                                         |
|         | HB              | 4.38                                         |
| Thr10   | HG,D, E         | 1.73 (4)<br>1.79 (3)<br>1.91 (2)<br>2.00 (1) |
|         | HN              | 8.16                                         |
|         | HA              | 4.40                                         |
|         | HB              | 3.75                                         |
|         | HG              | 1.28                                         |
| Asp11   | HN              | 8.36                                         |
|         | HA              | 4.55                                         |
|         | HB              | 2.86 (2)<br>3.26 (1)                         |
| Cp12    | HN              | 7.98                                         |
|         | HA              | 2.88                                         |
|         | HB              | 4.40                                         |
|         | HG,D,E          | 1.79 (4)<br>1.85 (3)<br>1.95 (2)<br>2.10 (1) |
| Val13   | HN              | 8.42                                         |
|         | HA              | 3.47                                         |
|         | HB              | 2.31                                         |
| Tyr14   | HG              | 0.82 (2)<br>1.03 (1)                         |
|         | HN              | 8.42                                         |
|         | HA              | 4.36                                         |
|         | HB              | 3.27 (2)<br>3.46 (1)                         |
|         | HD              | 6.66                                         |
|         | HE              | 7.14                                         |
| Glu15   | HN              | 8.49                                         |
|         | HA              | 4.08                                         |
|         | HB              | 2.17                                         |
|         | HG              | 2.50 (2)<br>2.72 (1)                         |
| Cp16    | HN              | 8.23                                         |
|         | HA              | 2.95                                         |
|         | HB              | 4.32                                         |
|         | HG,D,E          | 1.70 (4)<br>1.73 (3)<br>1.84 (2)<br>1.99 (1) |
|         | HN              | 8.35                                         |
| Trp17   | HA              | 4.41                                         |
|         | HB              | 3.18 (2)<br>3.22 (1)                         |
|         | HD1             | 7.15                                         |
|         | HE1             | 10.27                                        |
|         | HZ2             | 7.34                                         |
|         | HE3             | 7.53                                         |
|         | HH2             | 7.10                                         |
|         | HZ3             | 7.01                                         |
|         | HN              | 7.81                                         |
| His18   | HA              | 4.59                                         |
|         | HB              | 3.25 (2)<br>3.47 (1)                         |
|         | HD2             | 7.32                                         |
|         | HE              | 7.31 (2)<br>8.38 (1)                         |
|         | NH <sub>2</sub> | HN1                                          |
| HN2     |                 | 7.08                                         |

**Table S5.** Interproton contacts of peptide **27**, Cp stands for *trans*-(1*S*,2*S*)-2-amino-1-cyclopentanecarboxylic acid.

| Sequential ( <i>i, i+1</i> ) | Intensity |
|------------------------------|-----------|
| Arg1HA-Asp2HN                | s         |
| Arg1HG-Asp2HN                | w         |
| Asp2HA-Asp3HN                | s         |
| Asp3HA-Glu4HN                | s         |
| Asp3HB1-Glu4HN               | m         |
| Asp3HB2-Glu4HN               | m         |
| Cp5HA-Arg6HN                 | s         |
| Cp5HB-Arg6HN                 | m         |
| Arg6HA-Trp7HN                | m         |
| Arg6HB2-Trp7HN               | m         |
| Arg6HG1-Trp7HN               | w         |
| Arg6HG2-Trp7HN               | w         |
| Trp7HA-Leu8HN                | m         |
| Trp7HB1-Leu8HN               | s         |
| Trp7HB2-Leu8HN               | m         |
| Leu8HA-Cp9HN                 | m         |
| Leu8HD-Cp9HB                 | w         |
| Leu8HD-Cp9HN                 | w         |
| Leu8HG-Cp9HN                 | m         |
| Cp9HA-Thr10HN                | s         |
| Cp9HB-Thr10HN                | s         |
| Thr10HA-Asp11HN              | s         |
| Thr10HB-Asp11HN              | m         |
| Thr10HG-Asp11HN              | m         |
| Asp11HA-Cp12HN               | m         |
| Asp11HB1-Cp12HN              | s         |
| Cp12HA-Val13HN               | s         |
| Cp12HB-Val13HN               | m         |

| Cp12HA-Val13HB1    | w         |
|--------------------|-----------|
| Val13HG2-Tyr14HE   | m         |
| Val13HN-Tyr14HE    | w         |
| Tyr14HA-Glu15HN    | m         |
| Tyr14HB1-Glu15HN   | s         |
| Tyr14HB2-Glu15HN   | m         |
| Tyr14HE-Glu15HN    | m         |
| Tyr14HE-Glu15HA    | m         |
| Tyr14HE-Glu15HG1   | m         |
| Tyr14HE-Glu15HG2   | w         |
| Tyr14HN-Glu15HB    | w         |
| Glu15HA-Cp16HN     | m         |
| Glu15HB-Cp16HN     | s         |
| Glu15HN-Cp16HA     | w         |
| Cp16HA-Trp17HN     | s         |
| Cp16HN-Trp17HA     | w         |
| Trp17HA-His18HN    | m         |
| Trp17HN-His18HB1   | m         |
| His18HE-HN2HN1     | m         |
| His18HA-NH2HN2     | w         |
| Sequential (HN-HN) | Intensity |
| Asp3HN-Glu4HN      | s         |
| Glu4HN-Cp5HN       | s         |
| Cp5HN-Arg6HN       | m         |
| Arg6HN-Trp7HN      | m         |
| Trp7HN-Leu8HN      | m         |
| Cp9HN-Thr10HN      | m         |
| Thr10HN-Asp11HN    | m         |
| Asp11HN-Cp12HN     | s         |

| Cp12HN-Val13HN                 | m         |
|--------------------------------|-----------|
| Tyr14HN-Glu15HN                | m         |
| Glu15HN-Cp16HN                 | s         |
| Trp17HN-His18HN                | s         |
| His18HN-HN2HN1                 | s         |
| His18HN-HN2HN2                 | m         |
| Medium range ( <i>i, i+2</i> ) | Intensity |
| Asp2HA-Glu4HN                  | m         |
| Asp3HA-Cp5HN                   | m         |
| Cp5HA-Trp7HN                   | w         |
| Cp5HB-Trp7HE3                  | m         |
| Arg6HA-Leu8HN                  | w         |
| Leu8HA-Thr10HN                 | w         |
| Asp11HN-Val13HG1               | w         |
| Cp12HA-Tyr14HN                 | w         |
| Tyr14HB1-Cp16HN                | m         |
| Cp16HA-His18HN                 | w         |
| Cp16HB-His18HN                 | m         |
| Cp16HB-His18HD2                | m         |
| Trp17HA-HN2HN1                 | w         |
| Medium range ( <i>i, i+3</i> ) | Intensity |
| Glu4HA-Trp7HD1                 | m         |
| Glu4HA-Trp7HN                  | s         |
| Cp5HG-Leu8HD                   | w         |
| Cp5HB-Leu8HN                   | s         |
| Cp5HN-Leu8HD                   | w         |
| Arg6HA-Cp9HA                   | s         |
| Arg6HA-Cp9HN                   | m         |
| Arg6HA-Cp9HG                   | m         |

|                                  |                  |
|----------------------------------|------------------|
| Trp7HA-Thr10HN                   | s                |
| Trp7HE3-Thr10HG                  | m                |
| Leu8HA-Asp11HB2                  | s                |
| Leu8HA-Asp11HN                   | s                |
| Leu8HA-Asp11HB1                  | s                |
| Asp11HA-Tyr14HN                  | w                |
| Asp11HA-Tyr14HD                  | s                |
| Cp12HB-Glu15HN                   | s                |
| Cp12HB-Glu15HB                   | s                |
| Val13HA-Cp16HA                   | s                |
| Val13HA-Cp16HN                   | m                |
| Tyr14HA-Trp17HD1                 | s                |
| Tyr14HA-Trp17HN                  | s                |
| Glu15HA-His18HN                  | m                |
| Glu15HA-His18HB2                 | s                |
| Glu15HA-His18HD2                 | w                |
| <b>Medium range<br/>(i, i+4)</b> | <b>Intensity</b> |
| Asp3HA-Trp7HN                    | s                |
| Glu4HA-Leu8HN                    | w                |
| Glu4HB1-Leu8HN                   | w                |
| Glu4HB2-Leu8HN                   | w                |
| Arg6HA-Thr10HN                   | w                |
| Trp7HA-Asp11HN                   | s                |
| Asp11HA-Glu15HN                  | m                |
| Val13HG2-Trp17HE1                | m                |
| Tyr14HA-His18HD2                 | w                |
| Tyr 14HD-His18HE                 | w                |
| Tyr14HE-His18HE                  | w                |
| Glu15HA-HN2HN1                   | w                |

**Table S6.** Vicinal coupling constants ( ${}^3J_{\text{HNHA}}$ ) determined from  ${}^1\text{H}$  NMR spectrum for peptide **27**.

| NH   | ${}^3J$ [Hz] |
|------|--------------|
| HN1  | **           |
| HN2  | 7.09         |
| HN3  | 6.50         |
| HN4  | 6.15         |
| HN5  | 7.66         |
| HN6  | 2.3          |
| HN7  | 7.35         |
| HN8  | 5.83         |
| HN9  | 9.33         |
| HN10 | 2.88         |
| HN11 | 4.17         |
| HN12 | 9.10         |
| HN13 | ~3.3*        |
| HN14 | ~4*          |
| HN15 | 5.25         |
| HN16 | 9.02         |
| HN17 | 4.63         |
| HN18 | 8.84         |

**Table S7.** NMR calculation statistics for peptide **27**

|                                                   |       |
|---------------------------------------------------|-------|
| average number of NOE violations                  | 2.9   |
| average amount of NOE violations [ $\text{\AA}$ ] | 2.019 |
| number of different VdW violations                | 15    |
| average number of VdW violations                  | 8.7   |
| average amount of VdW violations [ $\text{\AA}$ ] | 2.371 |
| average RMSD [ $\text{\AA}$ ]                     | 1.428 |

**Interaction Energy Calculations.** Interaction Energies were calculated using MMGBSA [S5] method implemented in Amber 22 software [S6]. The forcefield ff5ipq-m extended with parameters for  $\beta$ -residues was applied [S7]. Peptide-protein complex were neutralized with Cl<sup>-</sup> ions and solvated with TIP3P waters in a rectangular box with a 12 Å buffer distance. The system was subjected to molecular dynamic calculations including: (a) minimization; (b) heating (50 ps); (c) density equilibration (50 ps) and (d) constant pressure equilibration (500 ps) at 300K. Subsequently, the production MD simulation were performed (500 ps) at 300K. The interaction energies (MMGBSA algorithm) were calculated using MMPBSA.py script included in Amber22 software.

**Table S8.** Peptide-RBD of S protein interaction energies calculated using MMGBSA method

| Peptide no | calculated $\Delta G$ [kcal/mol] |
|------------|----------------------------------|
| 7          | $-31.6 \pm 4.0$                  |
| 10         | $-31.4 \pm 4.3$                  |
| 12         | $-35.6 \pm 5.6$                  |
| 27         | $-44.4 \pm 6.6$                  |

**Molecular Dynamics simulations.** Calculations were performed using GROMACS [S8] software. The PDB file, of the RBD protein in complex with the inhibitor, was processed with pdb2gmx to generate the topology file using Amber03ff [S9] force field which includes parametrization of trans-(1*S*-2*S*)-2-aminocyclopentanecarboxylic acid (*trans*-ACPC) under the three letter code SS5. The protein complex was then placed in a cubic box with 10 Å distance from any box edge, and the box was filled with water molecules using spc216.gro, a 3-point solvent model. The solvated complex was neutralized substituting water molecules by the corresponding ions to achieve neutral charge of the box. Subsequently, the system was energy minimized using steepest descent minimization with maximum 50000 steps and maximum force of < 1000 kJ/mol/nm. Long range electrostatic interactions were treated with Particle Mesh Ewald (PME). Next the system was allowed to equilibrate in two stages: (a) Heating equilibration phase (NVT equilibration): The temperature was set at 300 K, over 100 ps simulation in 50000 steps at 2 fs per step, applying Periodic Boundary Conditions and modified Berendsen thermostat, with position restrains on the protein complex; (b) pressure equilibration phase (NPT equilibration): The pressure equilibration used the same molecular dynamic parameters as the NVT phase using pressure coupling, controlled by Parrinello-Rahman with a reference pressure of 1.0 bar and tau\_p 2ps. The equilibration was run over 100 ps. Finally, MD production was done. A 100 ns simulation was run. From the trajectory we extracted the radius of gyration of the complex for the most potent and less potent inhibitors towards RBD-protein.

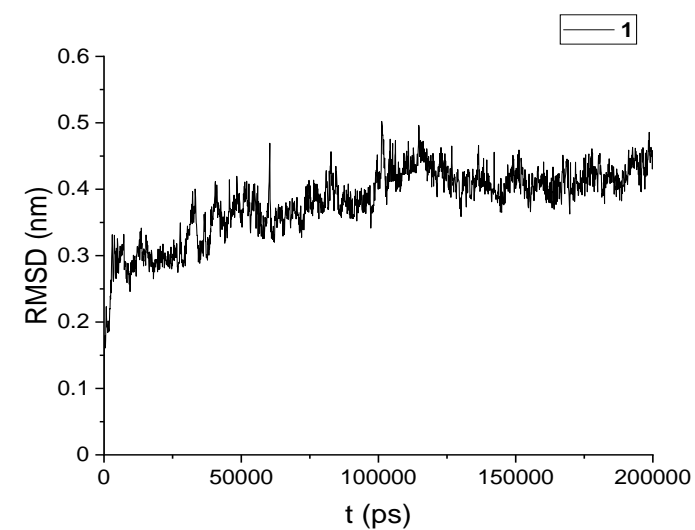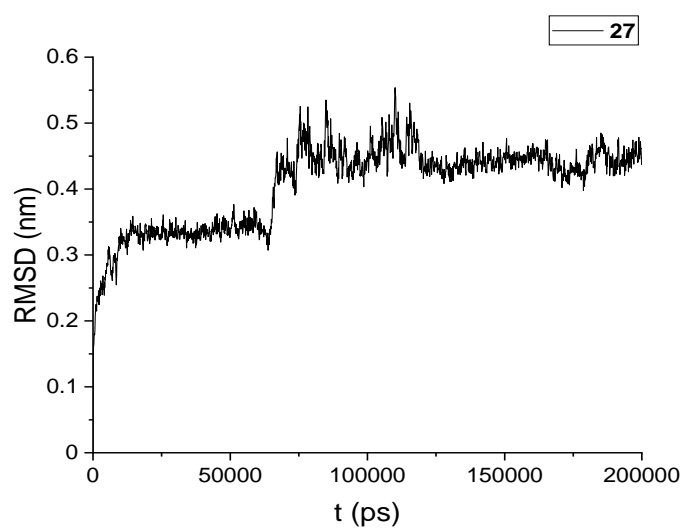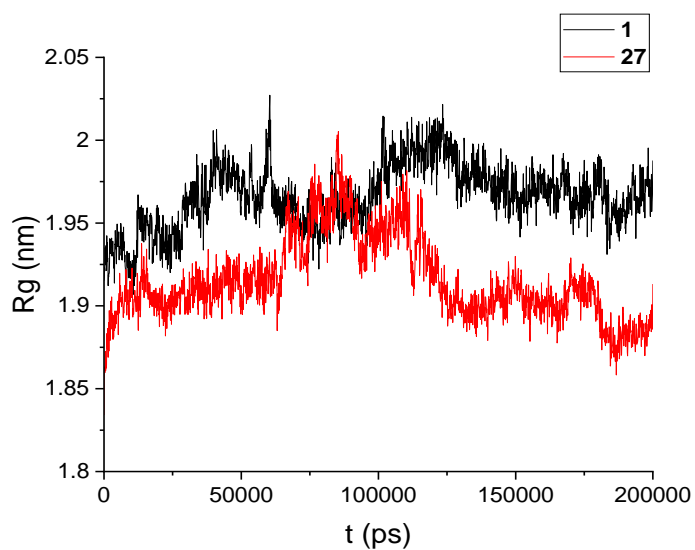

**Figure S190.** RMSD and radius of gyration ( $R_g$ ) for complexes of peptides **1** and **27** with RBD of the S protein during MD simulations.

## References

- [S1] C.D. Schwieters, J.J. Kuszewski, and G.M. Clore, *Progr. NMR Spectroscopy*, 2006, 48, 47-62.
- [S2] R. Yan, Y. Zhang, Y. Li, L. Xia, Y. Guo, Q. Zhou, *Science*, 2020, 367, 1444–1448.
- [S3] L. Cao, I. Goreshnik, B. Coventry, J. B. Case, L. Miller, L. Kozodoy, R. E. Chen, L. Carter, A. C. Walls, Y.-J. Park, E.-M. Strauch, L. Stewart, M. S. Diamond, D. Veessler, D. Baker, *Science*, 2020, 370, 426–431.
- [S4] W. S. Horne, L. M. Johnson, T. J. Ketas, P. J. Klasse, M. Lu, J. P. Moore, S. H. Gellmana, *Proc. Natl. Acad. Sci. U. S. A.* 2009, 106, 14751–14756.
- [S5] B. R. Miller III, T. D. McGee Jr., J. M. Swails, N. Homeyer, H Gohlke, A. E. Roitberg, *J. Chem. Theory Comput.*, 2012, 8, 3314-3321.
- [S6] D.A. Case, H.M. Aktulga, K. Belfon, I.Y. Ben-Shalom, J.T. Berryman, S.R. Brozell, D.S. Cerutti, T.E. Cheatham, III, G.A. Cisneros, V.W.D. Cruzeiro, T.A. Darden, N. Forouzesh, G. Giambaşu, T. Giese, M.K. Gilson, H. Gohlke, A.W. Goetz, J. Harris, S. Izadi, S.A. Izmailov, K. Kasavajhala, M.C. Kaymak, E. King, A. Kovalenko, T. Kurtzman, T.S. Lee, P. Li, C. Lin, J. Liu, T. Luchko, R. Luo, M. Machado, V. Man, M. Manathunga, K.M. Merz, Y. Miao, O. Mikhailovskii, G. Monard, H. Nguyen, K.A. O’Hearn, A. Onufriev, F. Pan, S. Pantano, R. Qi, A. Rahnamoun, D.R. Roe, A. Roitberg, C. Sagui, S. Schott-Verdugo, A. Shajan, J. Shen, C.L. Simmerling, N.R. Skrynnikov, J. Smith, J. Swails, R.C. Walker, J. Wang, J. Wang, H. Wei, X. Wu, Y. Wu, Y. Xiong, Y. Xue, D.M. York, S. Zhao, Q. Zhu, and P.A. Kollman (2023), *Amber 2023*, University of California, San Francisco.



[S7] A. T. Bogetti, H. E. Piston, J. M. G. Leung, C. C. Cabalreja, D. T. Yang, A. J. DeGrave, K. T. Debiec, D. S. Cerutti, D. A. Case, W. S. Horne, L. T. Chong, *J. Chem. Phys.* 2020, 14, 153, 064101.

[S8] M.J. Abraham, T. Murtola, R. Schulz, S. Páll, J.C. Smith, B. Hess, and E. Lindahl, *SoftwareX*, 2015, 1–2, 19–25.

[S9] E. J. Sorin, V. S. Pande, *Biophys. J.* 2005, 88, 2472-2493.
